# Supplementary material
Source: PubMed Central journal article supplement (PMC5675000)
Supplement: NIHMS906719-supplement-1.pdf [file NIHMS906719-supplement-1.pdf]

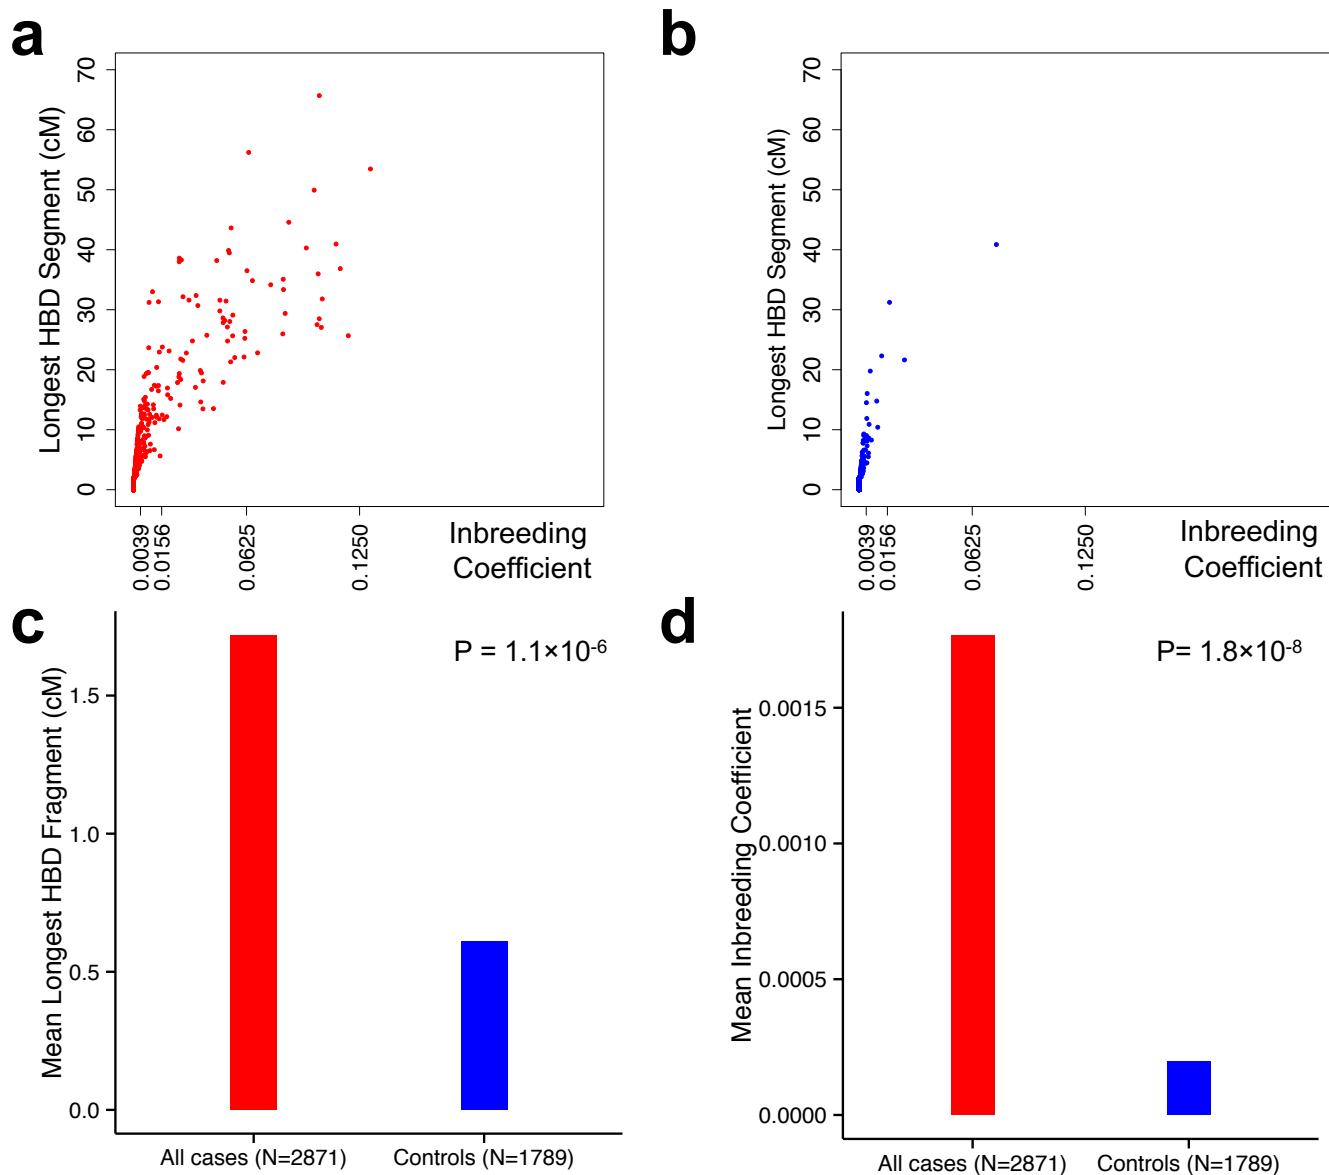

**Supplementary Figure 1. Significant difference in the degree of consanguinity between cases and controls.** Red and blue dots represent the longest homozygosity-by-descent (HBD) segments and inbreeding coefficients of case (**a**) or control (**b**) subjects, respectively. For reference, the ticks on the x-axis correspond to the inbreeding coefficient for third, second, first cousin, and half-siblings (from smallest to largest). The distribution of the mean longest HBD segment (**c**) and inbreeding coefficient (**d**) respectively between cases and controls was compared using a Kolomogorov-Smirnov non-parametric test.

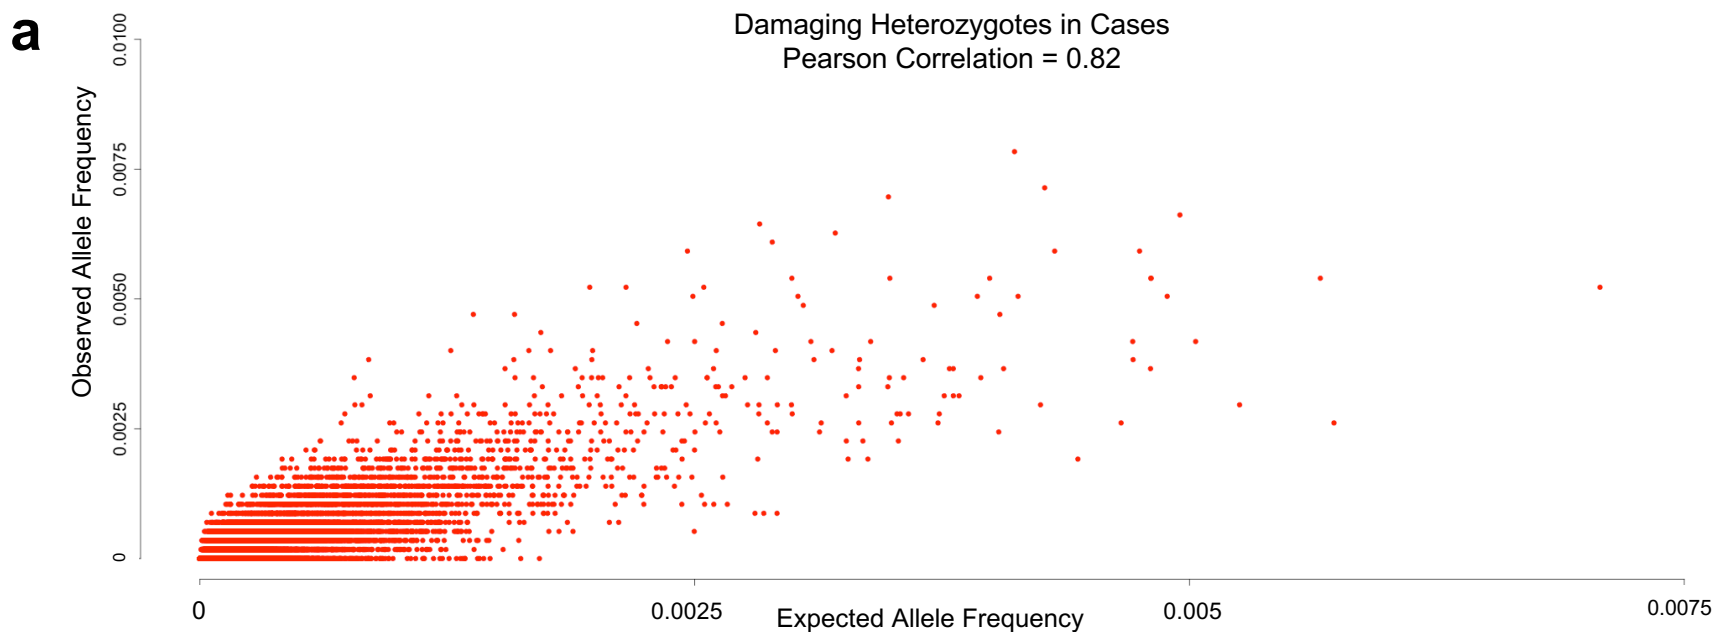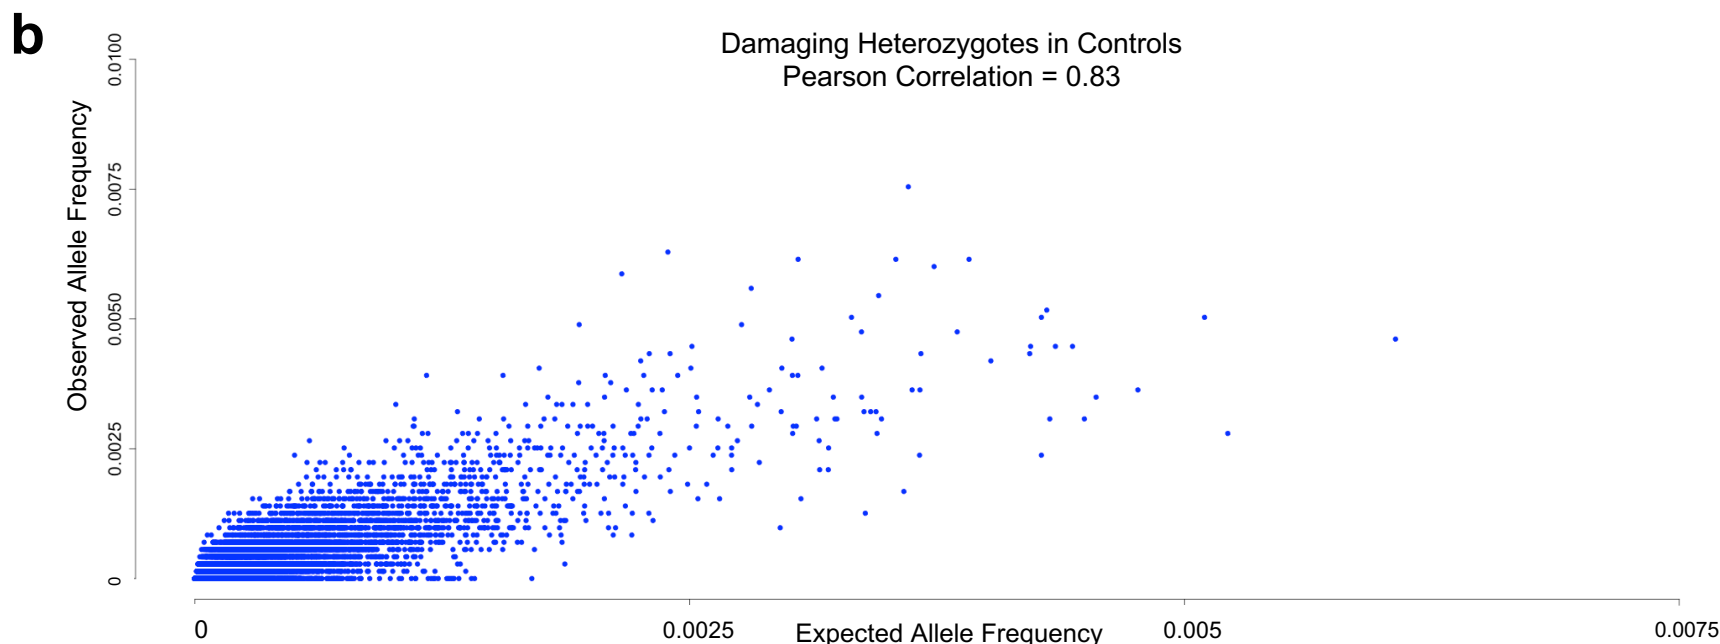

**Supplementary Figure 2. Correlation between the observed and expected allele frequencies for rare (allele frequency <math>< 10^{-5}</math>) damaging heterozygous variants in cases (a) and controls (b).** The expected and observed allele frequencies (expected values based on each gene's probability of *de novo* mutation) for each gene is shown. Two genes, *TTN* and *RYR1*, were extreme outliers for expected and observed allele frequency and were excluded from the plot for clarity, but included in the correlation calculation. The expected number of rare damaging heterozygotes in each gene was calculated using a linear model including the *de novo* probability stratified by the pLI score (see **Online Methods**). The Pearson correlation coefficients without taking into account *TTN* and *RYR1* are 0.80 in cases and 0.82 in controls, respectively.

**a****Cases**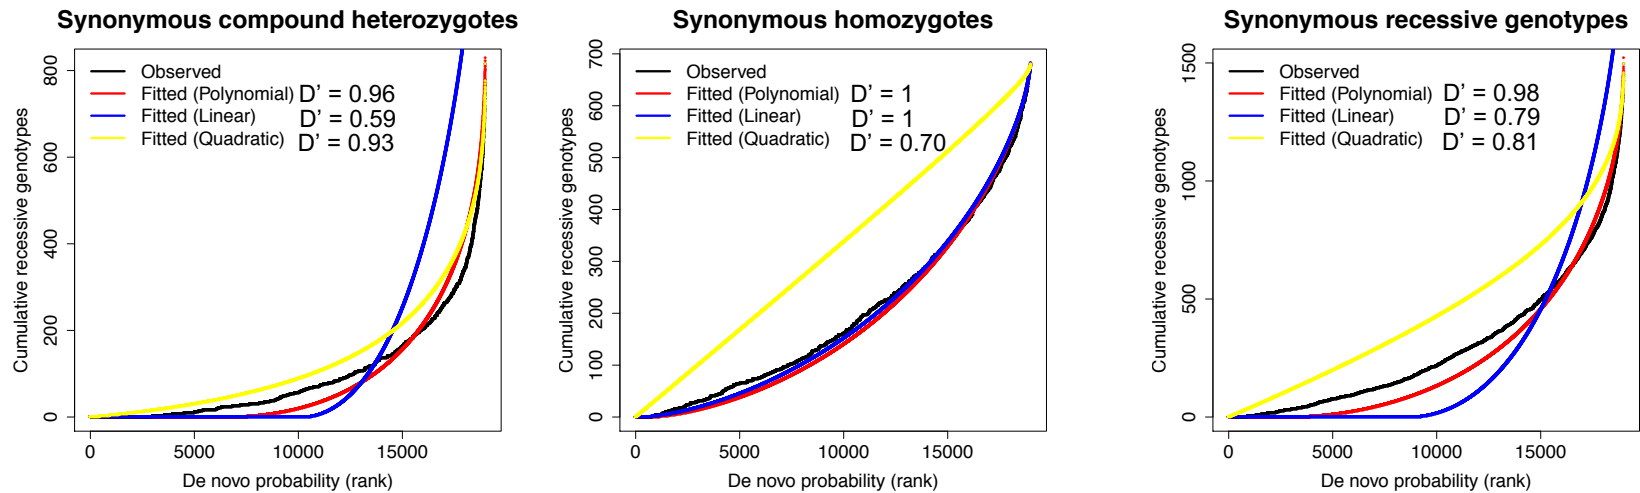**b****Controls**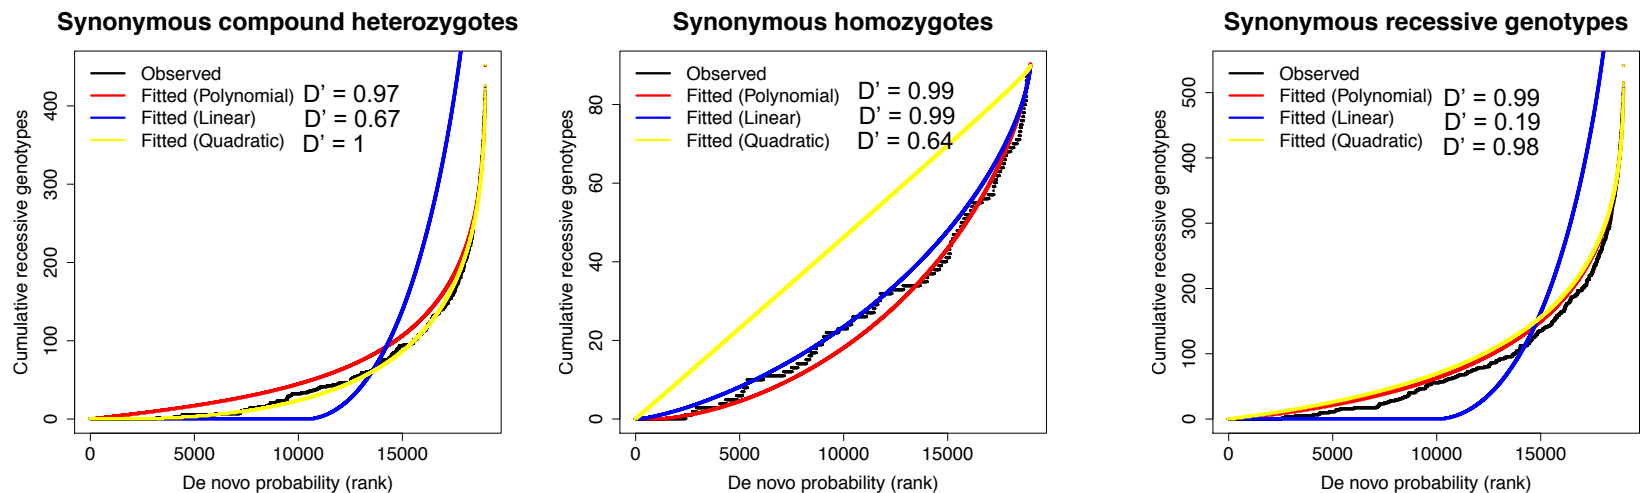

**Supplementary Figure 3. The polynomial model using *de novo* probabilities as predictors fits the observed number of synonymous recessive genotypes (RG) appropriately in cases and controls at the gene level.** A polynomial regression model ( $RG\ Count = \beta_0 + \beta_1 \times (\text{mutability}) + \beta_2 \times (\text{mutability}^2) + \varepsilon$ ) was fitted to determine the relationship between the *de novo* probability and the number of RGs for synonymous compound heterozygotes, homozygotes, and all RGs, respectively, in cases (a) and controls (b). The x-axis represents the rank of the synonymous *de novo* probability. The y-axis represents the cumulative count of synonymous RGs. The model fit was evaluated by the distance goodness-of-fit metric  $D' = |1 - (\sum_{\text{all}}(\text{observed}_i - \text{fitted}_i)^2 / \sum_{\text{all}}(\text{observed}_i)^2)|$ ; 1 is best fit and 0 is worst).

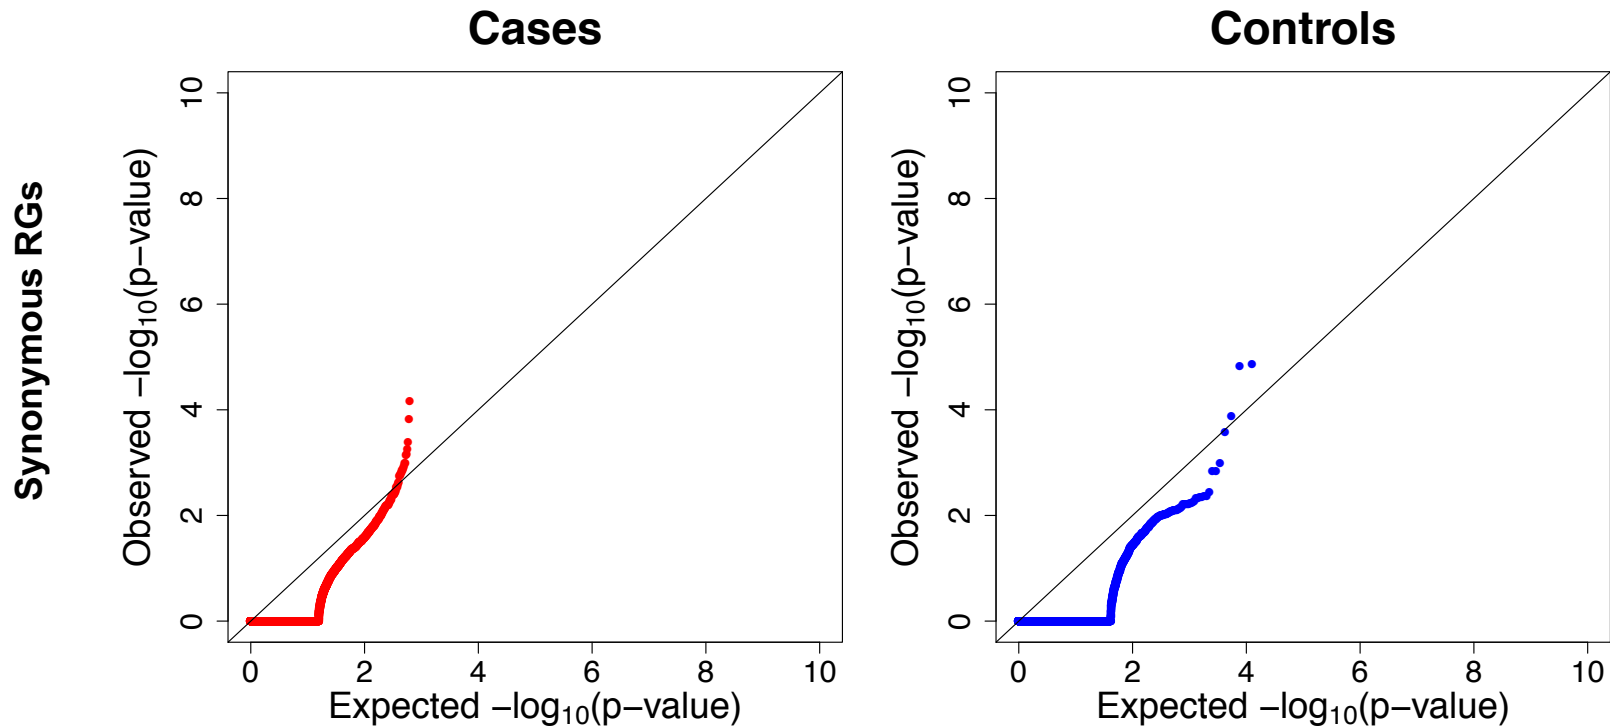

**Supplementary Figure 4. Quantile-quantile plots of the observed versus expected p-values comparing the burden of synonymous recessive genotypes (RGs) adjusted for fitted values from the polynomial model for each gene.** A polynomial regression model ( $\text{RG Count} = \beta_0 + \beta_1 \times (\text{mutability}) + \beta_2 \times (\text{mutability}^2) + \varepsilon$ ) was fitted to determine the relationship between the *de novo* probability and the number of synonymous RGs within each gene in cases and controls, respectively. A one-sided binomial test was conducted to compare the observed number of RGs within each gene versus expected adjusting for the fitted values from the polynomial model. The quantile-quantile plots show that there is no inflation of p-values in both cases and controls for synonymous RGs, suggesting that the observed numbers of synonymous RGs in each gene match the expected number estimated using the polynomial model.

**a****Synonymous RGs**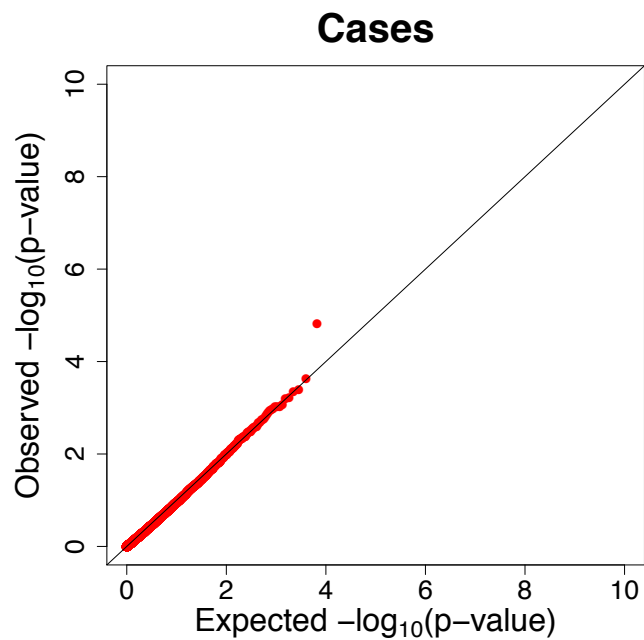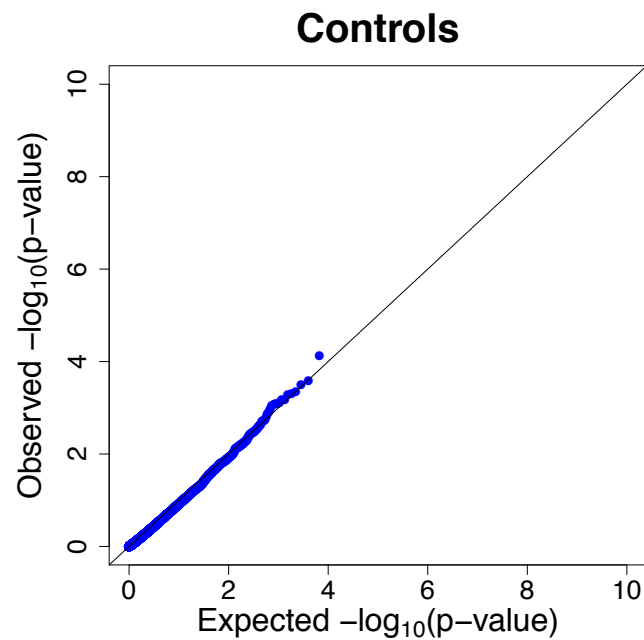**b****Damaging RGs**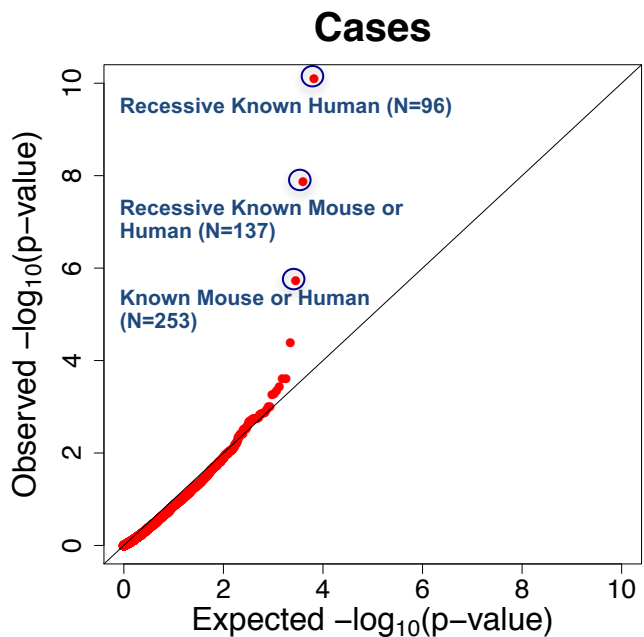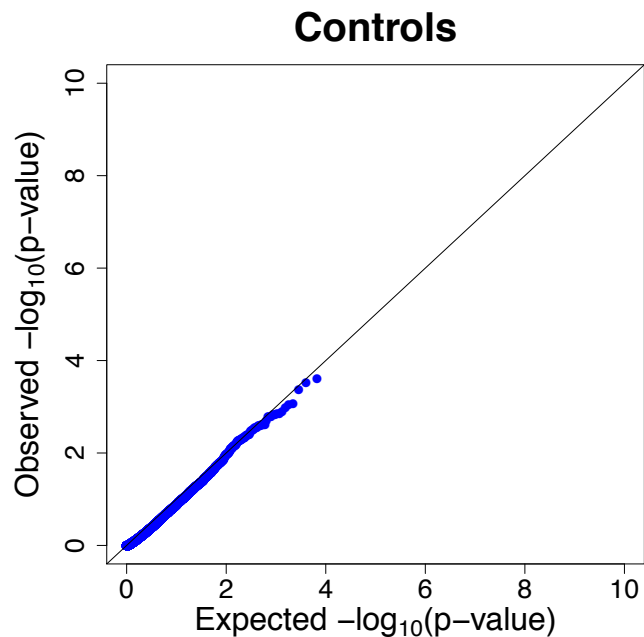

**Supplementary Figure 5.** Quantile-quantile plots of the observed versus expected p-values comparing the burden of synonymous (a) and damaging (b) recessive genotypes (RGs) adjusted for fitted values from the polynomial model for a gene-set. A polynomial regression model ( $\text{RG Count} = \beta_0 + \beta_1 \times (\text{mutability}) + \beta_2 \times (\text{mutability}^2) + \epsilon$ ) was fitted to determine the relationship between the *de novo* probability and the number of damaging RGs and synonymous RGs, respectively. We performed simulations by selecting gene sets of 100-1,000 genes at random from all genes. A one-sided binomial test was then conducted to compare the observed number of RGs in the randomly chosen gene set versus expected adjusting for the fitted values from the polynomial model. A total of 10,000 iterations were conducted. *GDF1*, *MYH6*, and *TTN* were removed in the simulation of damaging RGs in cases because they were known outliers. The numbers of damaging RGs in 'Known Mouse and Human' and 'Recessive Known Mouse and Human' gene sets far exceed the expected in cases; however, there was no enrichment in controls and for synonymous RGs.

**a****Cases**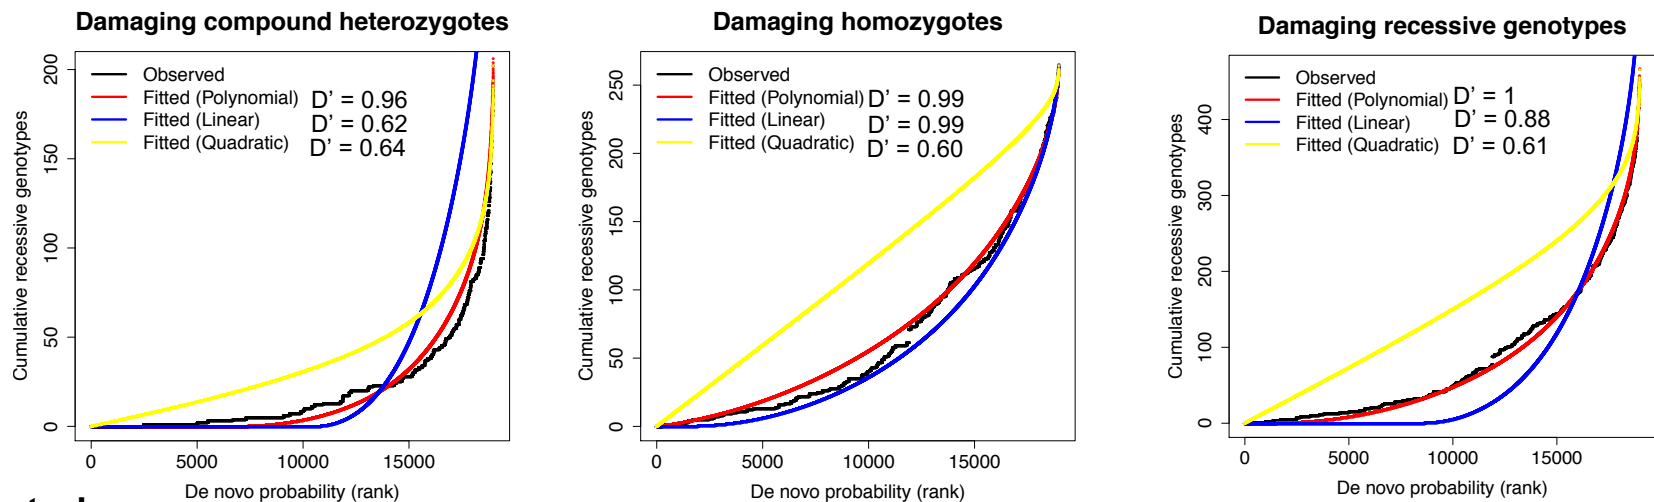**b****Controls**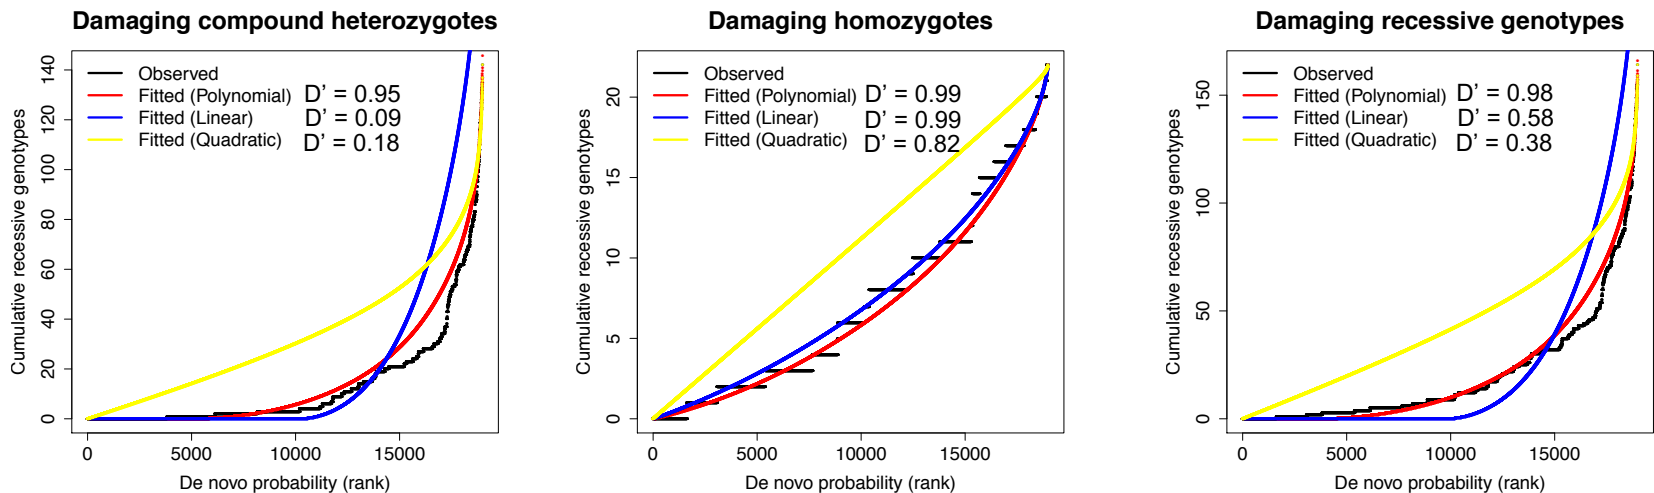

**Supplementary Figure 6. The polynomial model using *de novo* probabilities as predictors fits the observed number of damaging recessive genotypes appropriately in cases and controls at the gene level.** A polynomial regression (Recessive genotype (RG) Count =  $\beta_0 + \beta_1 \times (\text{mutability}) + \beta_2 \times (\text{mutability}^2) + \varepsilon$ ) model was fitted to determine the relationship between the *de novo* probability and the number of RGs for damaging compound heterozygotes, homozygotes, and all RGs, respectively, in cases (a) and controls (b). The x-axis represents the rank of the damaging *de novo* probability. The y-axis represents the cumulative count of damaging RGs. The model fit was evaluated by the distance goodness-of-fit metric  $D' = |1 - (\sum_{\text{all}}(\text{observed}_i - \text{fitted}_i)^2 / \sum_{\text{all}}(\text{observed}_i)^2)|$ ; 1 is best fit and 0 is worst).

**a Cases**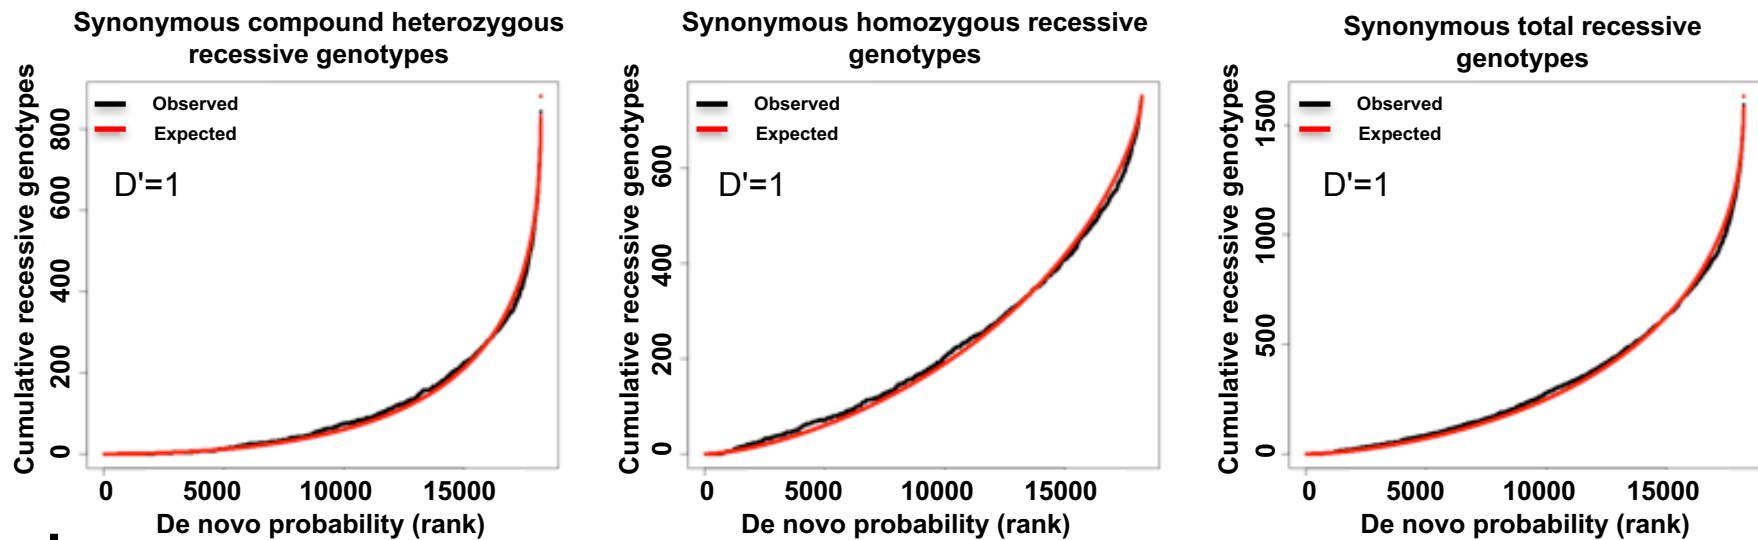**b Controls**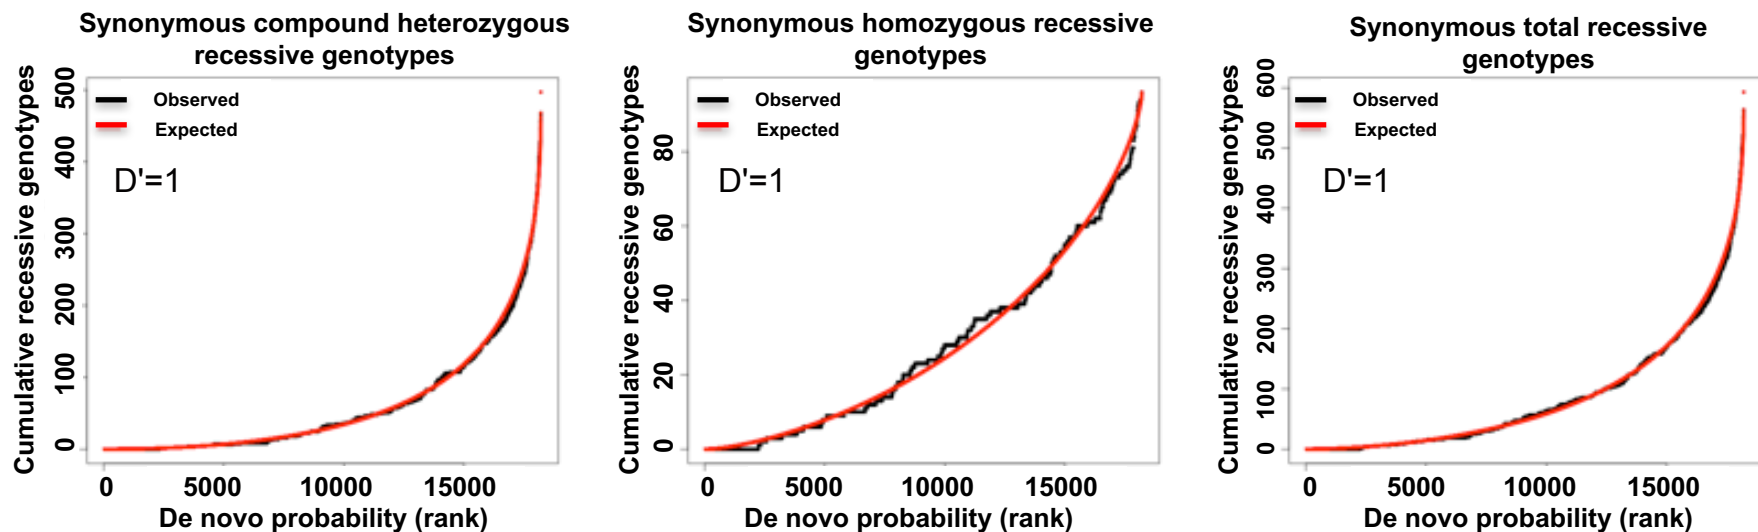

**Supplementary Figure 7. Expected distribution of synonymous recessive genotypes when independently modeling compound heterozygous variants as a quadratic fit and homozygous variants as a linear fit using *de novo* probabilities.** The cumulative number of recessive genotypes is plotted by the rank ordered probability of synonymous *de novo* mutation for each gene (smallest to largest). For each cohort, (a) cases and (b) controls, compound heterozygous and homozygous genotypes were considered independently to calculate the expected distribution of genotypes. The total number of recessive genotypes in each cohort is derived from the sum of the compound heterozygous and homozygous distributions. The model fit was evaluated by the distance goodness-of-fit metric  $D'$  (scaled from 0, worst fit, to 1, best fit). See **Online Methods** for details.

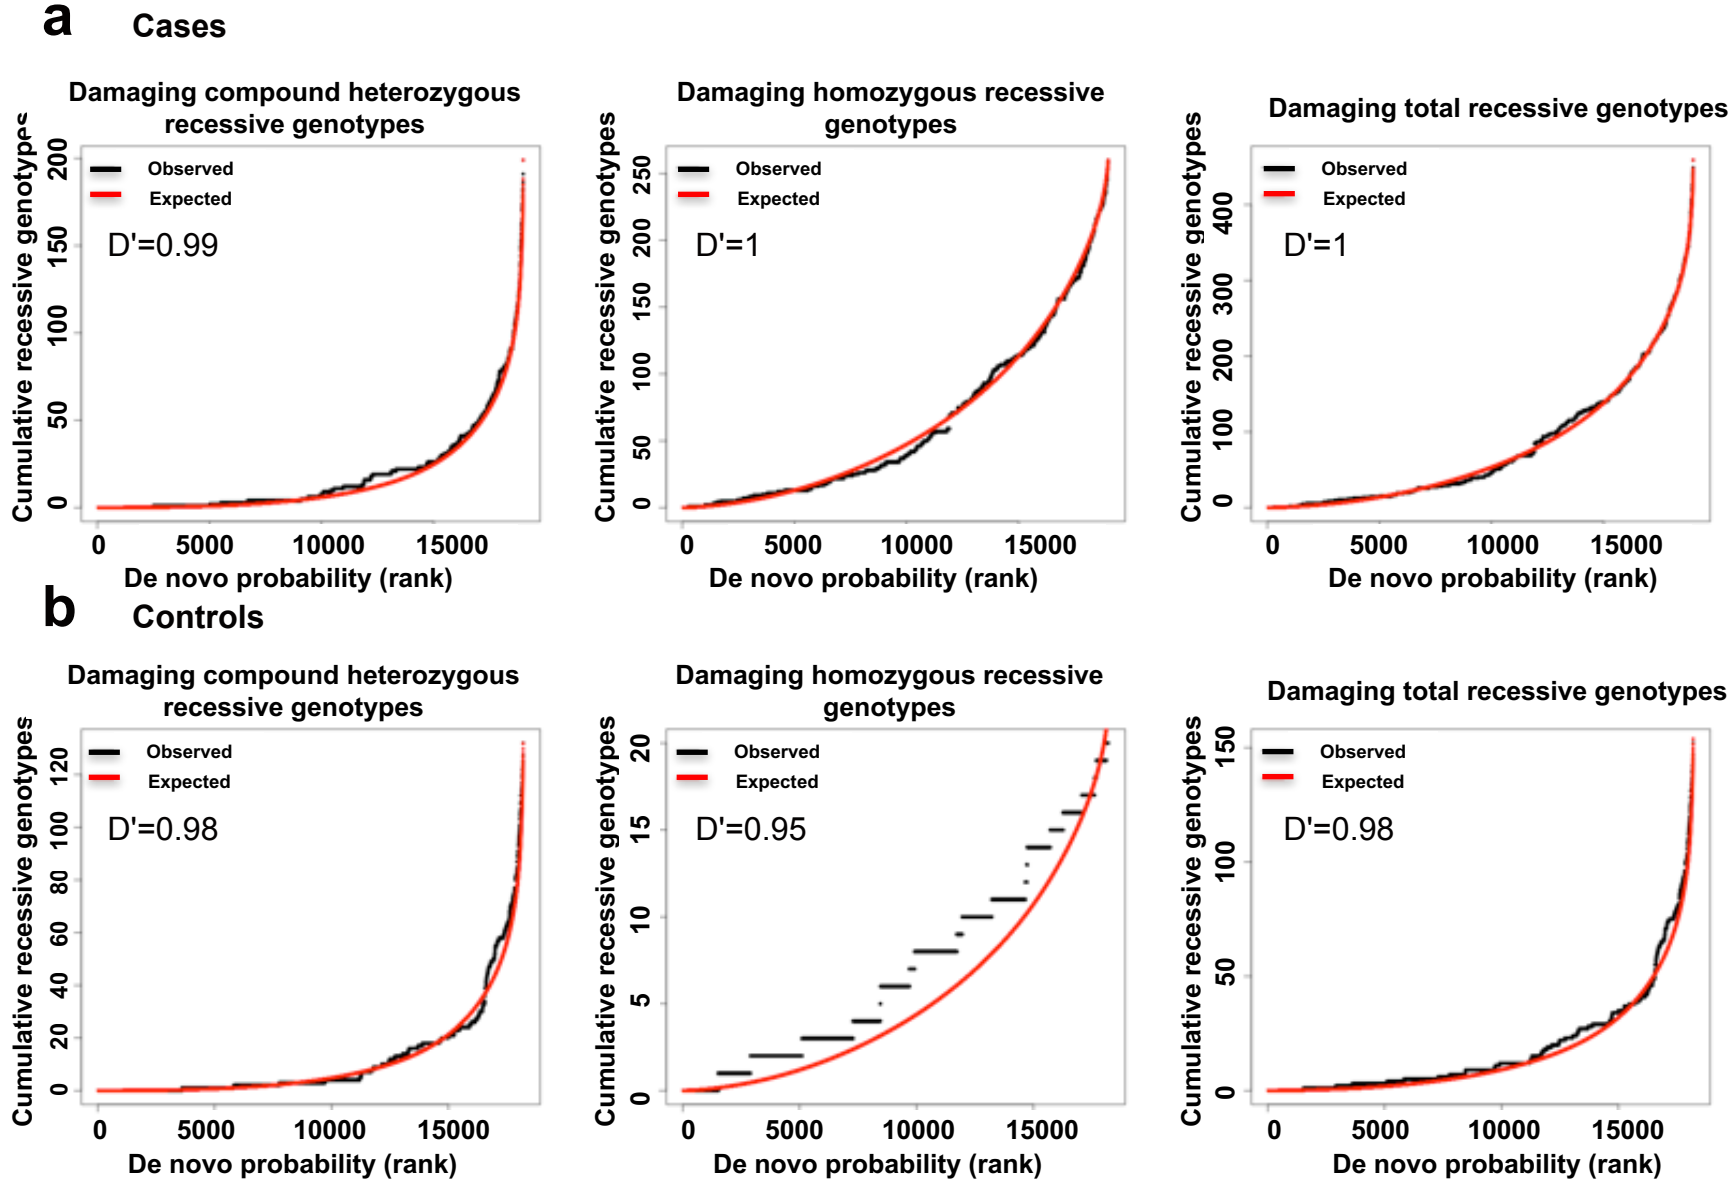

**Supplementary Figure 8. Expected distribution of damaging recessive genotypes when independently modeling compound heterozygous variants as a quadratic fit and homozygous variants as a linear fit using *de novo* probabilities.** The cumulative number of recessive genotypes is plotted by the rank ordered probability of damaging *de novo* mutation for each gene (smallest to largest). For each cohort, (a) cases and (b) controls, compound heterozygous and homozygous genotypes were considered independently to calculate the expected distribution of genotypes. The total number of recessive genotypes in each cohort is derived from the sum of the compound heterozygous and homozygous distributions. The model fit was evaluated by the distance goodness-of-fit metric  $D'$  (scaled from 0, worst fit, to 1, best fit). See **Online Methods** for details. The stepwise appearance of homozygous genotypes in controls (b, middle) is due to the low number of homozygous observations in this cohort (22).



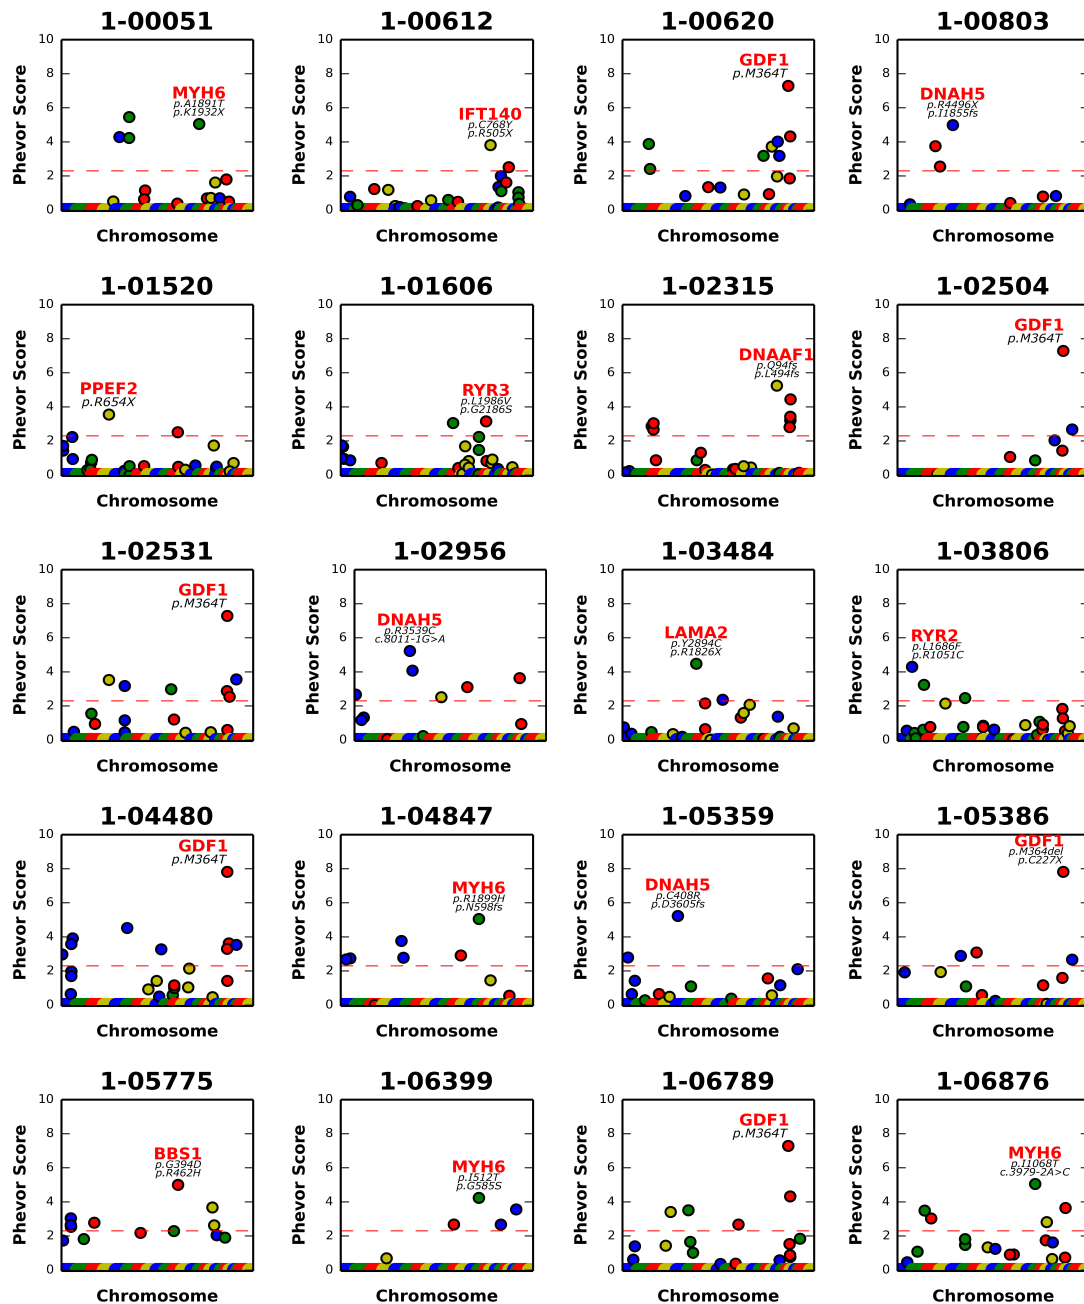

**Supplementary Figure 9. Burden-test approach for recessive variants implicated in congenital heart disease.** Trios were scored using the VAAST burden test, and candidate genes were prioritized using the PHEVOR ontological re-ranking tool (see **Supplementary Note**). Each Manhattan-style panel displays genes along chromosomes 1-23, X, and Y on the x-axis and PHEVOR scores on the y-axis ( $\log_{10}$ ). Genes with a PHEVOR score above the red dashed line have an HPO-based prior probability of association  $\geq 0.5$  with the proband's phenotype (e.g. conotruncal, left outflow obstruction, heterotaxy, etc.) and a VAAST p-value of  $\leq 0.005$ .

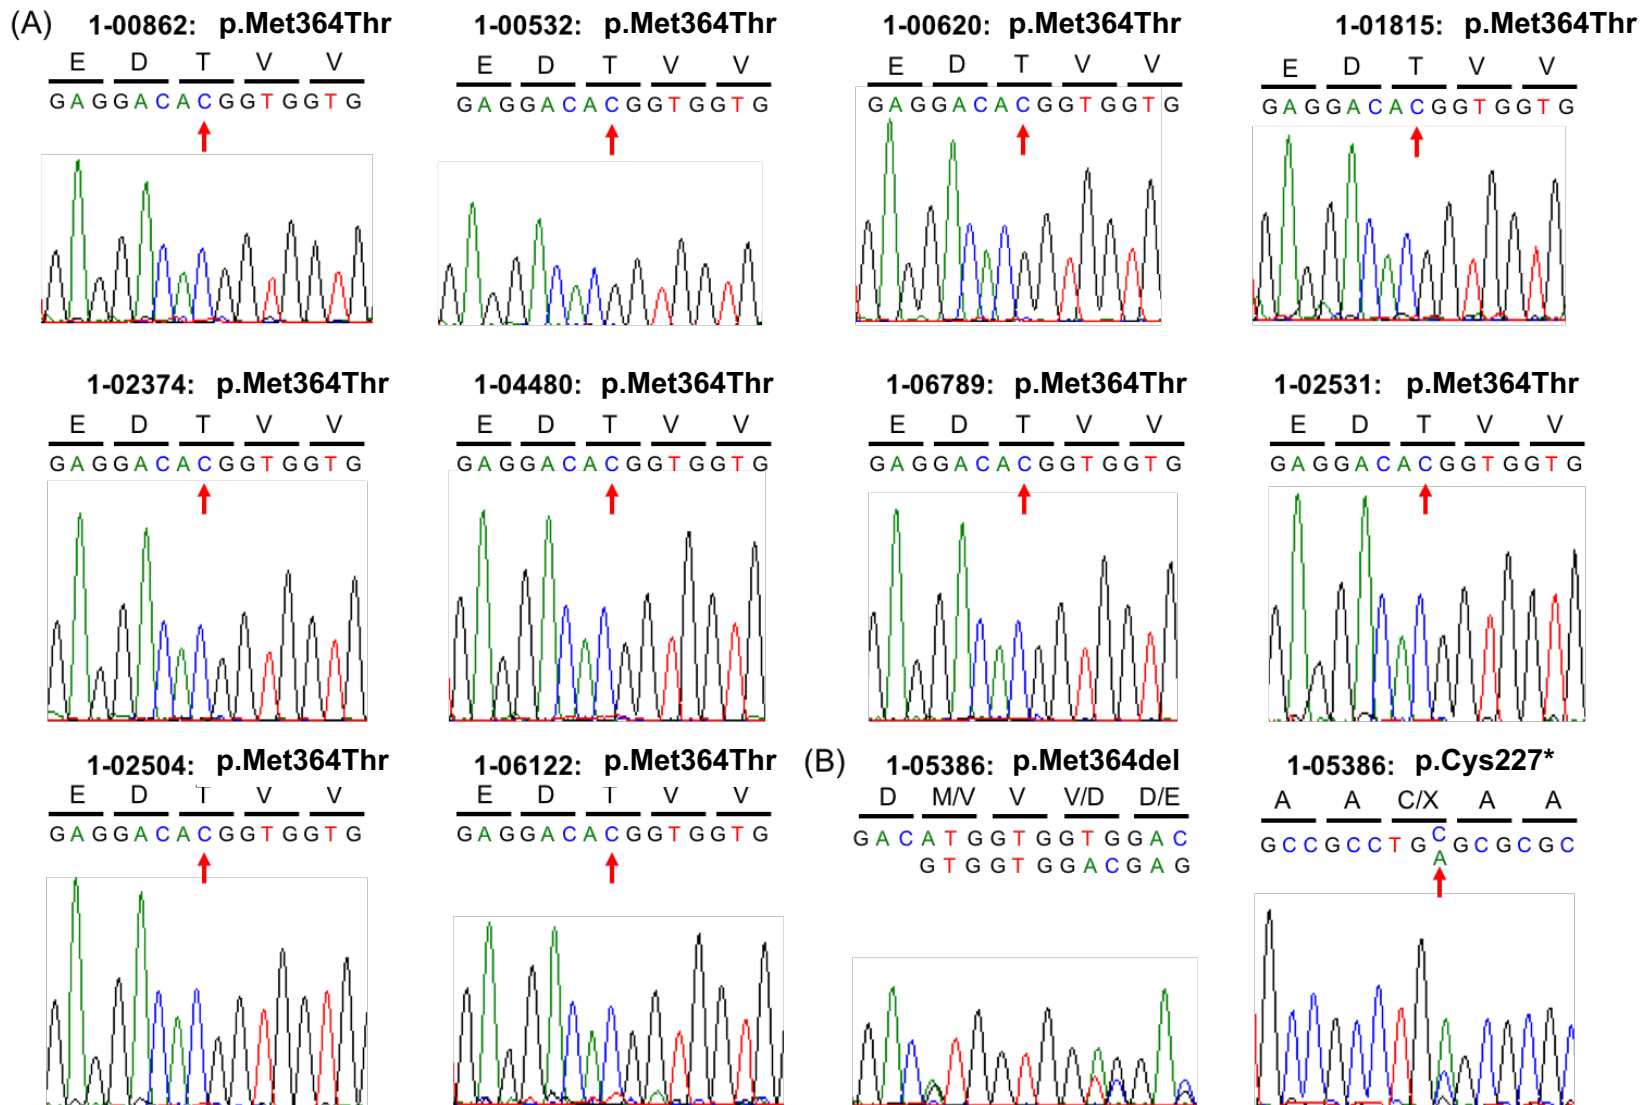

**Supplementary Figure 10. *GDF1* variants in 11 CHD cases.** (A) Sanger sequence chromatograms for 10 CHD cases carrying homozygous p.Met364Thr (c.1091T>C) mutations. (B) Sanger sequence chromatograms for a CHD case carrying a non-frameshift (p.Met364del; c.1090\_1092delATG) and a stop-gain variant (p.Cys227\*; c.681C>A).

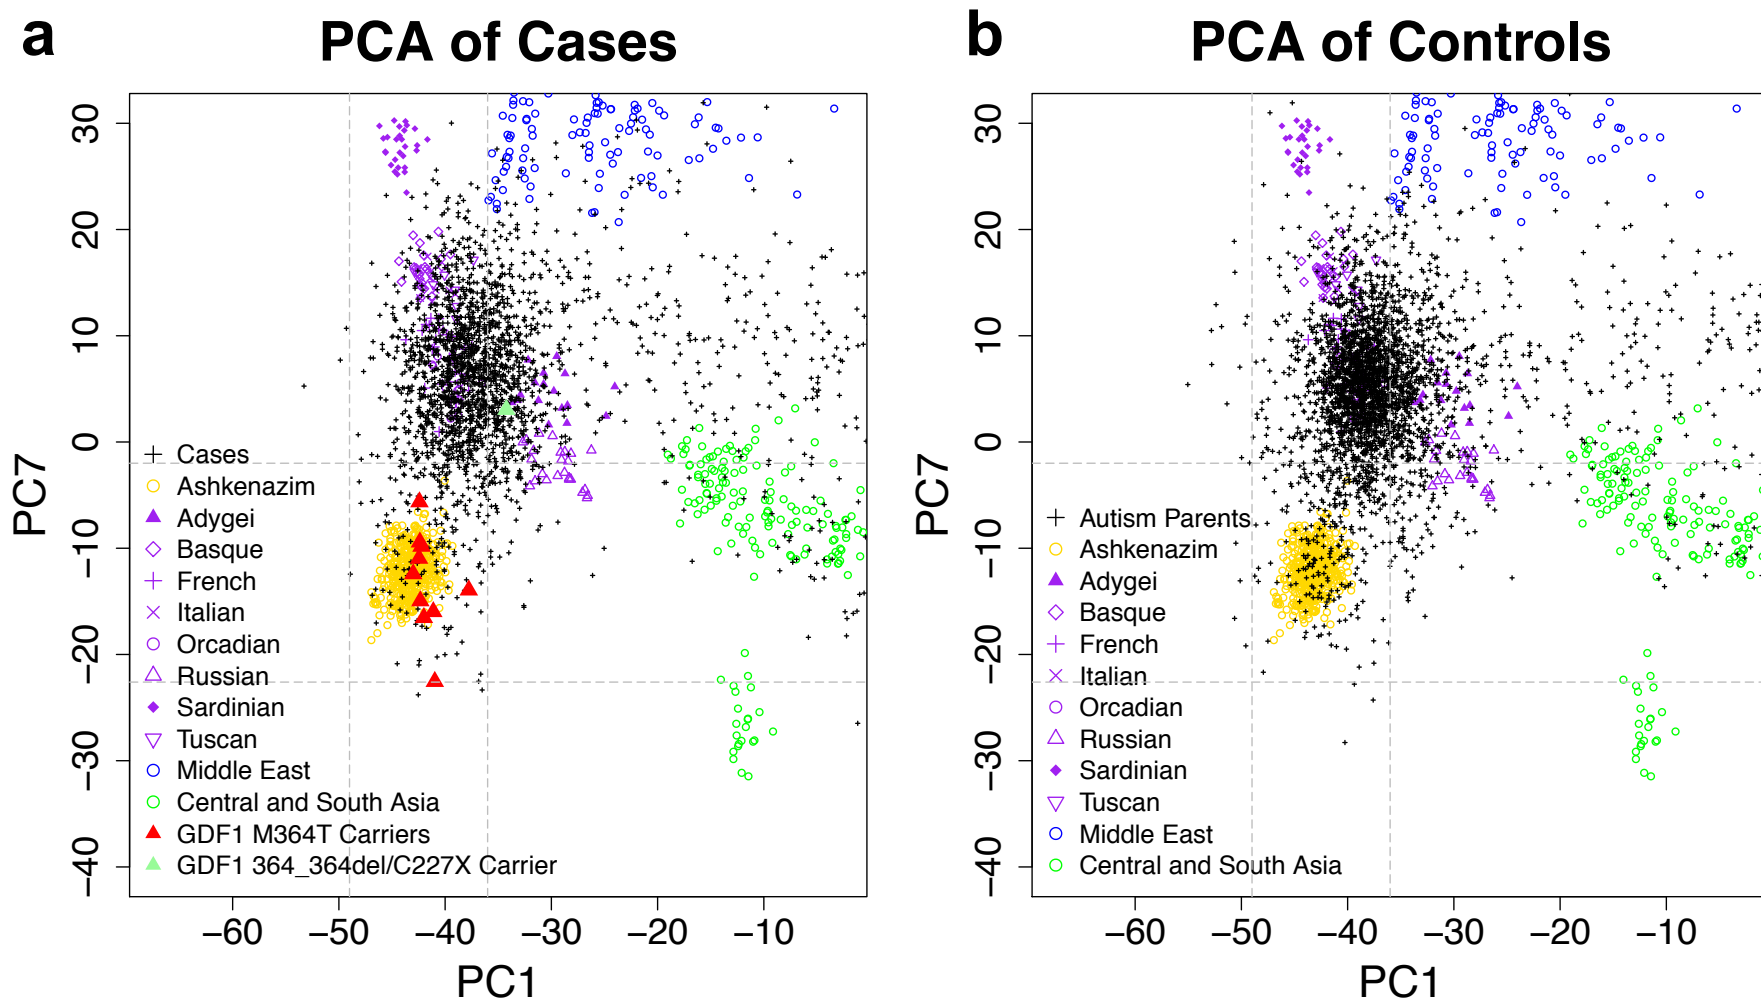

**Supplementary Figure 11. Principal component analysis of 2,871 CHD cases and 3,578 parental controls. (a)** 7.11% (204 out of 2,871) of all CHD cases best cluster to Ashkenazim (defined by the gray dash lines in the figures). Eleven patients with *GDF1* recessive genotypes are denoted by filled triangles (red for p.Met364Thr mutation carriers and pale green for p.Met364del/p.Cys227\* variant carrier, respectively) **(b)** 8.44% (302 out of 3,578) of all autism parental controls best cluster to Ashkenazim (defined by the gray dash lines in the figures).

## Distribution of probable mutation ages from DMLE+2.3

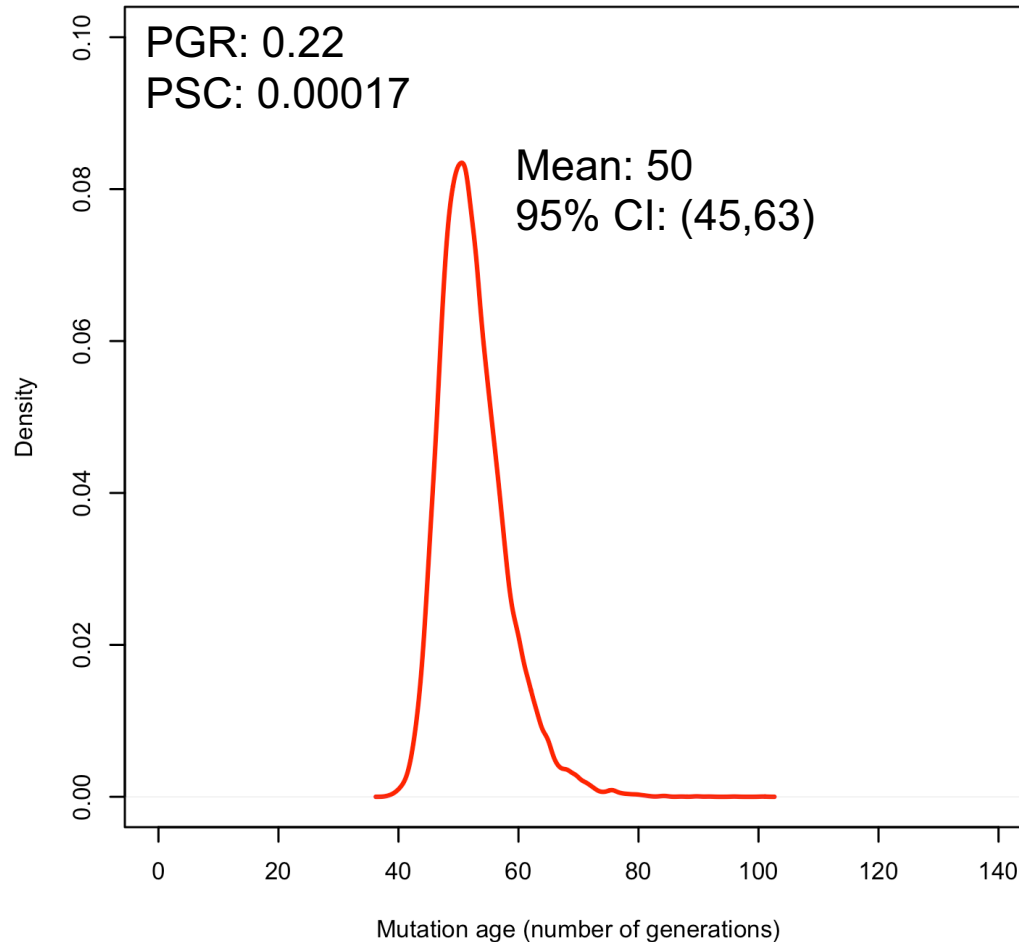

**Supplementary Figure 12. Estimation of the mutation age for *GDF1*-p.Met364Thr.** Mutation age (the number of generations, x-axis) was estimated using DMLE+2.3 software based on a Bayesian inference approach. A total of 20,000 iterations were performed. The y-axis shows the relative frequency of occurrences for each mutation age estimate. The optimum population growth rate (PGR) and the proportion of sampled chromosome (PSC) for *GDF1*-p.Met364Thr mutation in Ashkenazim were estimated to be 0.22 and 0.00017, respectively (see **Supplementary Note**). The average mutation age is 50 and the 95% confidence interval is between 45 and 63.

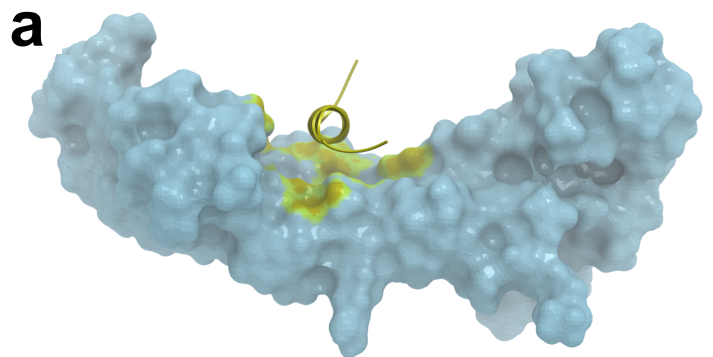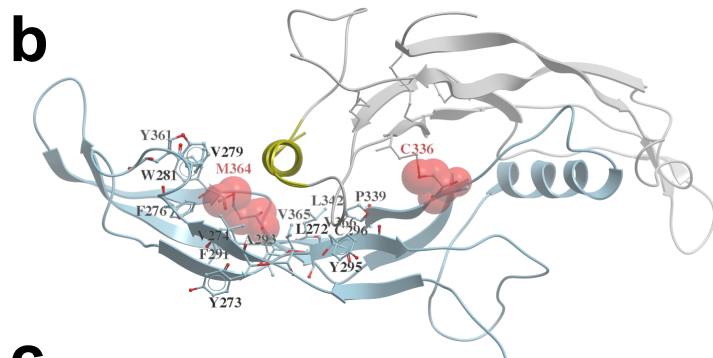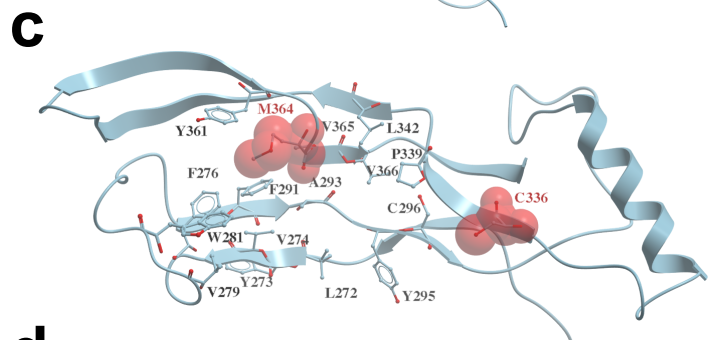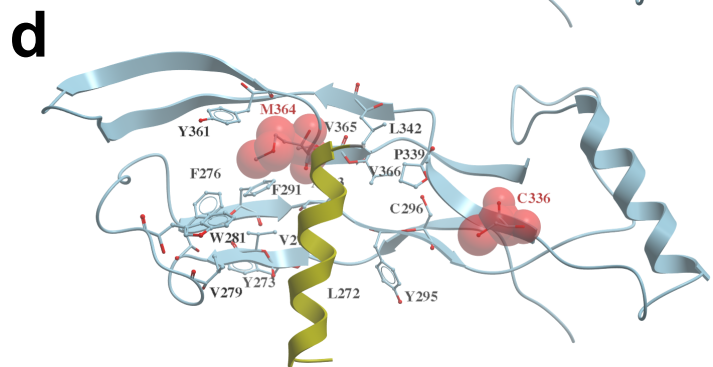

**Supplementary Figure 13. Structural representation of the  $\alpha$ -helix and flanking residues (residues 314-329; shown in yellow) binding in *GDF1*.** (a) The predominantly hydrophobic  $\alpha$ -helix binds in a shallow cavity on the adjacent monomer (shown as blue surface). The surface of the residues that interact with the  $\alpha$ -helix on the adjacent monomer have been colored yellow. (b) The two monomers (white and blue) bind with a two-fold inverted symmetry, where the predominantly hydrophobic  $\alpha$ -helix (shown in yellow) from one monomer binds in a shallow hydrophobic cavity from the adjacent monomer. The interacting residues from the cavity have been labelled and shown as sticks. The position of M364 and C336 have been illustrated as red balls. (c) Top view of the residues that interact with the  $\alpha$ -helix, illustrated as sticks. The floor of the cavity is hydrophobic. (d) Top view of the  $\alpha$ -helix (yellow) binding to the adjacent monomer. The interacting residues have been illustrated as sticks. Only the  $\alpha$ -helix has been drawn for clarity purpose.

**1-04847: p.Arg1899His**

K F R/H K V  
AAGTTCC<sup>G</sup>CAAGGTTG  
A

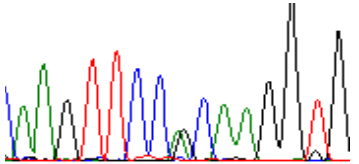

**1-04847: p.Asn598Lysfs\*38**

K N/K K/Q D/G P/S  
A A A A A C A A G G A T C C T  
A C A A G G A T C C

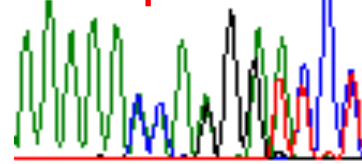

**1-01407 : p.Glu98Lys**

L H K P A  
C T G C A C A A G C C C G C G

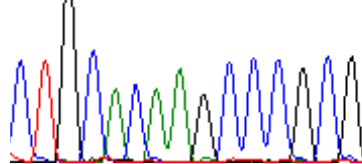

**1-07343 : p.Arg1610Cys**

R S R N E  
C G C A G C C G C A A C G A G

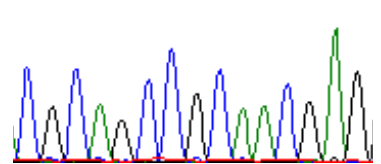

**1-06399: p.Gly585Ser**

Y A G/S T V  
T A C G C C G G C A C T G T G  
A

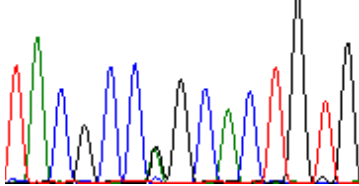

**1-06399: p.Ile512Thr**

T F I/T D F  
A C A T T C A T C T G A C T T T  
C

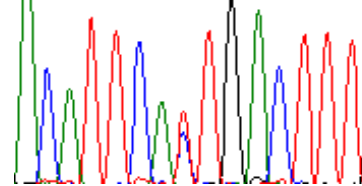

**1-06876: p.Ile1068Thr**

E S I/T M D  
G A G A G C A T C C A T G G A C  
C

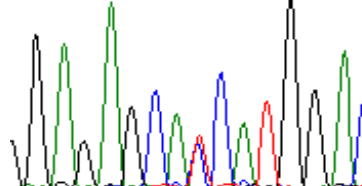

**1-06876: c.3979-2A>C**

A K  
C C T C C C C A G G C G A A G  
A

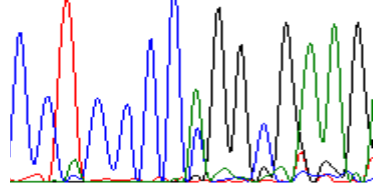

**1-00051: p.Lys1932\***

G A K/X  
G G T G C C A A G G T G G G T  
A

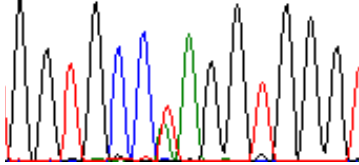

**1-00051: p.Ala1891Thr**

E Q A/T N T  
G A G C A A G C C A A C A C C  
A

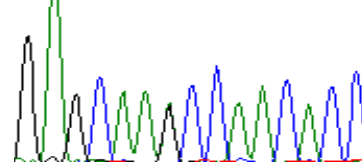

**1-05009: p.Ala1327Val**

A/V K N  
C C C C A G G C G A A G A A C  
C

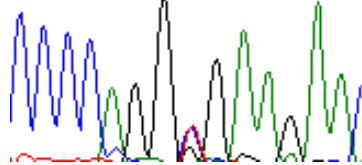

**1-05009: p.Leu388Phe**

A Y L/F M G  
G C C T A C C T C A T G G G G  
C

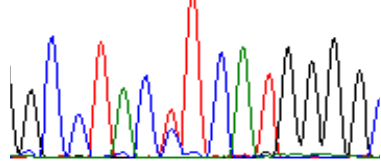

**Supplementary Figure 14. Sanger sequence chromatograms for 7 CHD cases carrying recessive genotypes in *MYH6*.**

**a****2,871 Cases**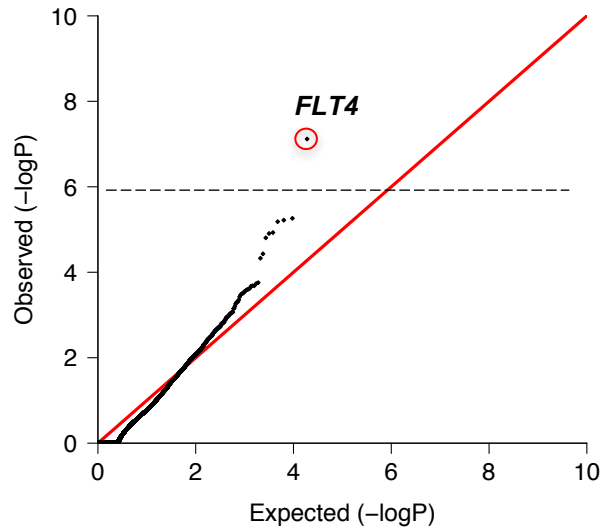**b****3,578 Controls**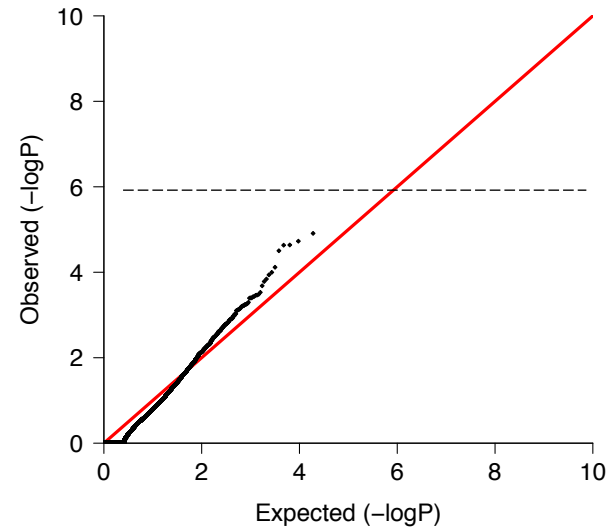

**Supplementary Figure 15. *FLT4* surpasses genome-wide significance in gene burden analysis of rare loss-of-function heterozygous variants in all genes** (a) Quantile-quantile plot of observed versus expected p-values in cases is shown. The probability of the observed number of variants in each gene was calculated from the total number of loss-of-function (LoF) heterozygous variants and proportion of LoF *de novo* probability using the binomial test. (b) Quantile-quantile plot of observed versus expected p-values in controls is shown. *FLT4* is the only gene surpassing genome-wide significance ( $2.6 \times 10^{-6}$ ,  $0.05/(18,989)$ ) in cases. No genes reach genome-wide significance in controls.

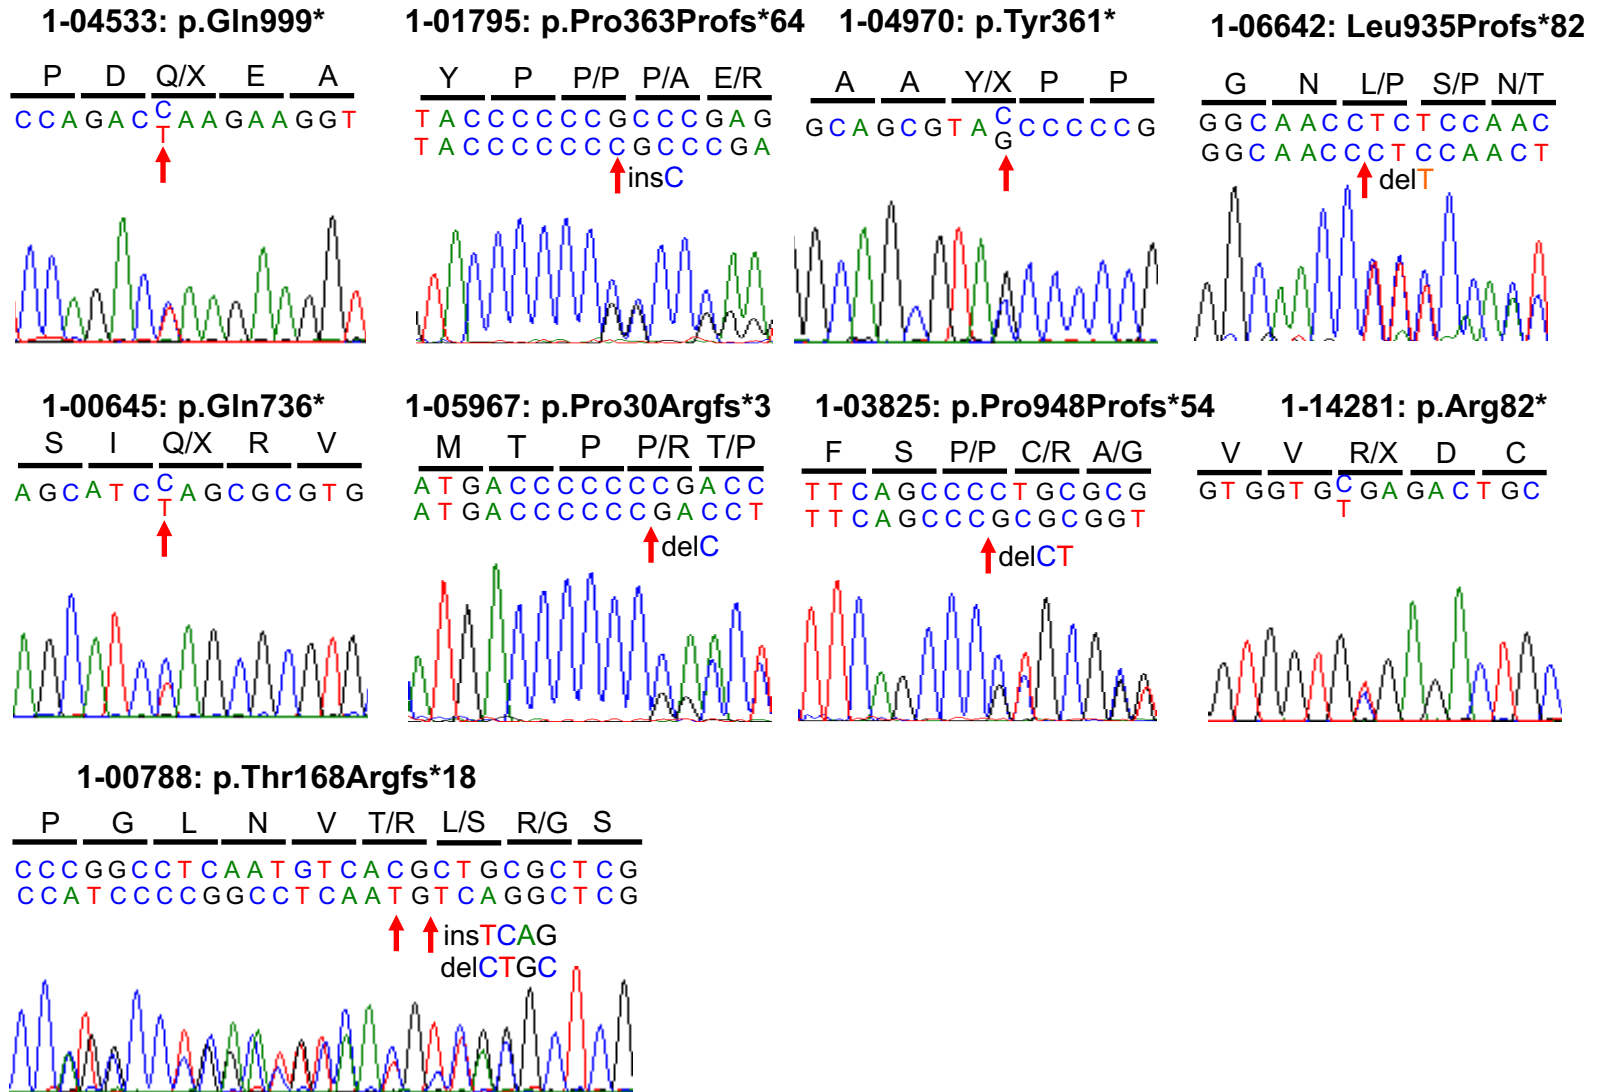

Supplementary Figure 16. Sanger chromatograms for 10 CHD cases carrying *FLT4* loss-of-function heterozygous mutations



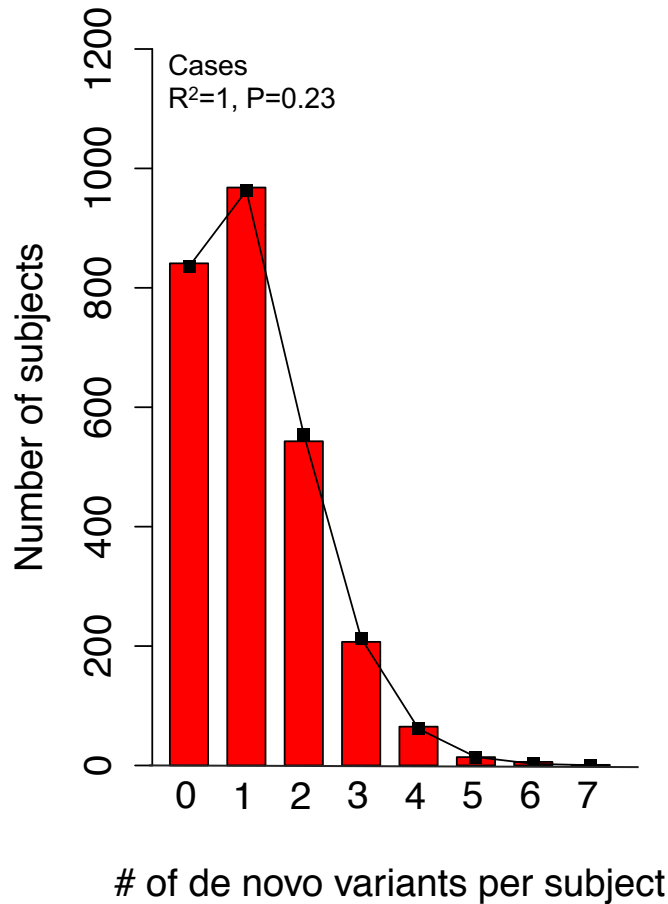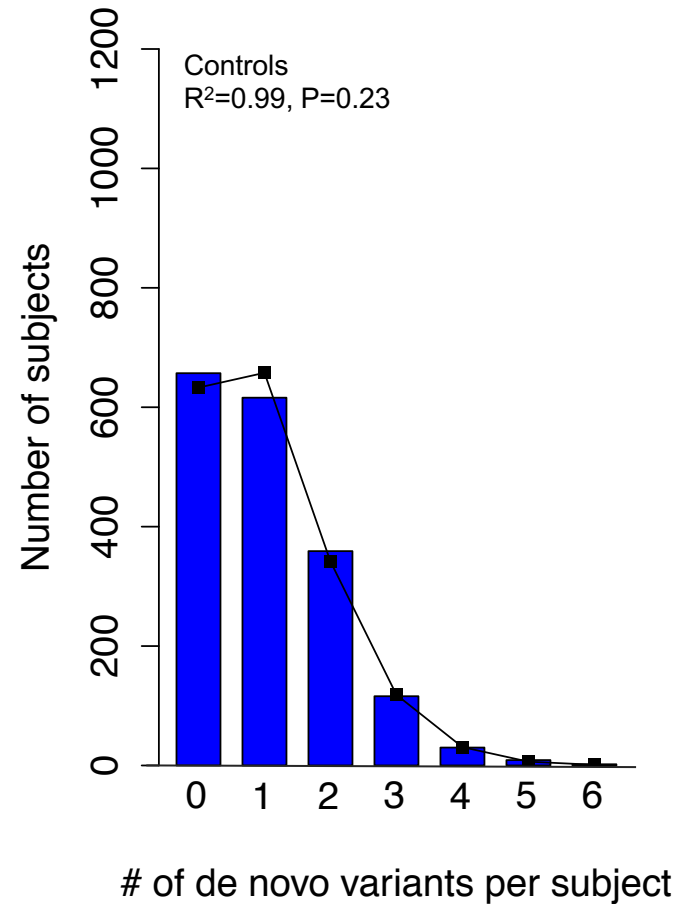

**Supplementary Figure 17. *De novo* mutation rate closely approximates Poisson distribution in cases and controls.** Observed number of *de novo* mutations per subject (bars) compared to the numbers expected (line) from the Poisson distribution in the case (red) and control (blue) cohorts. 'p' denotes chi-squared p-value.

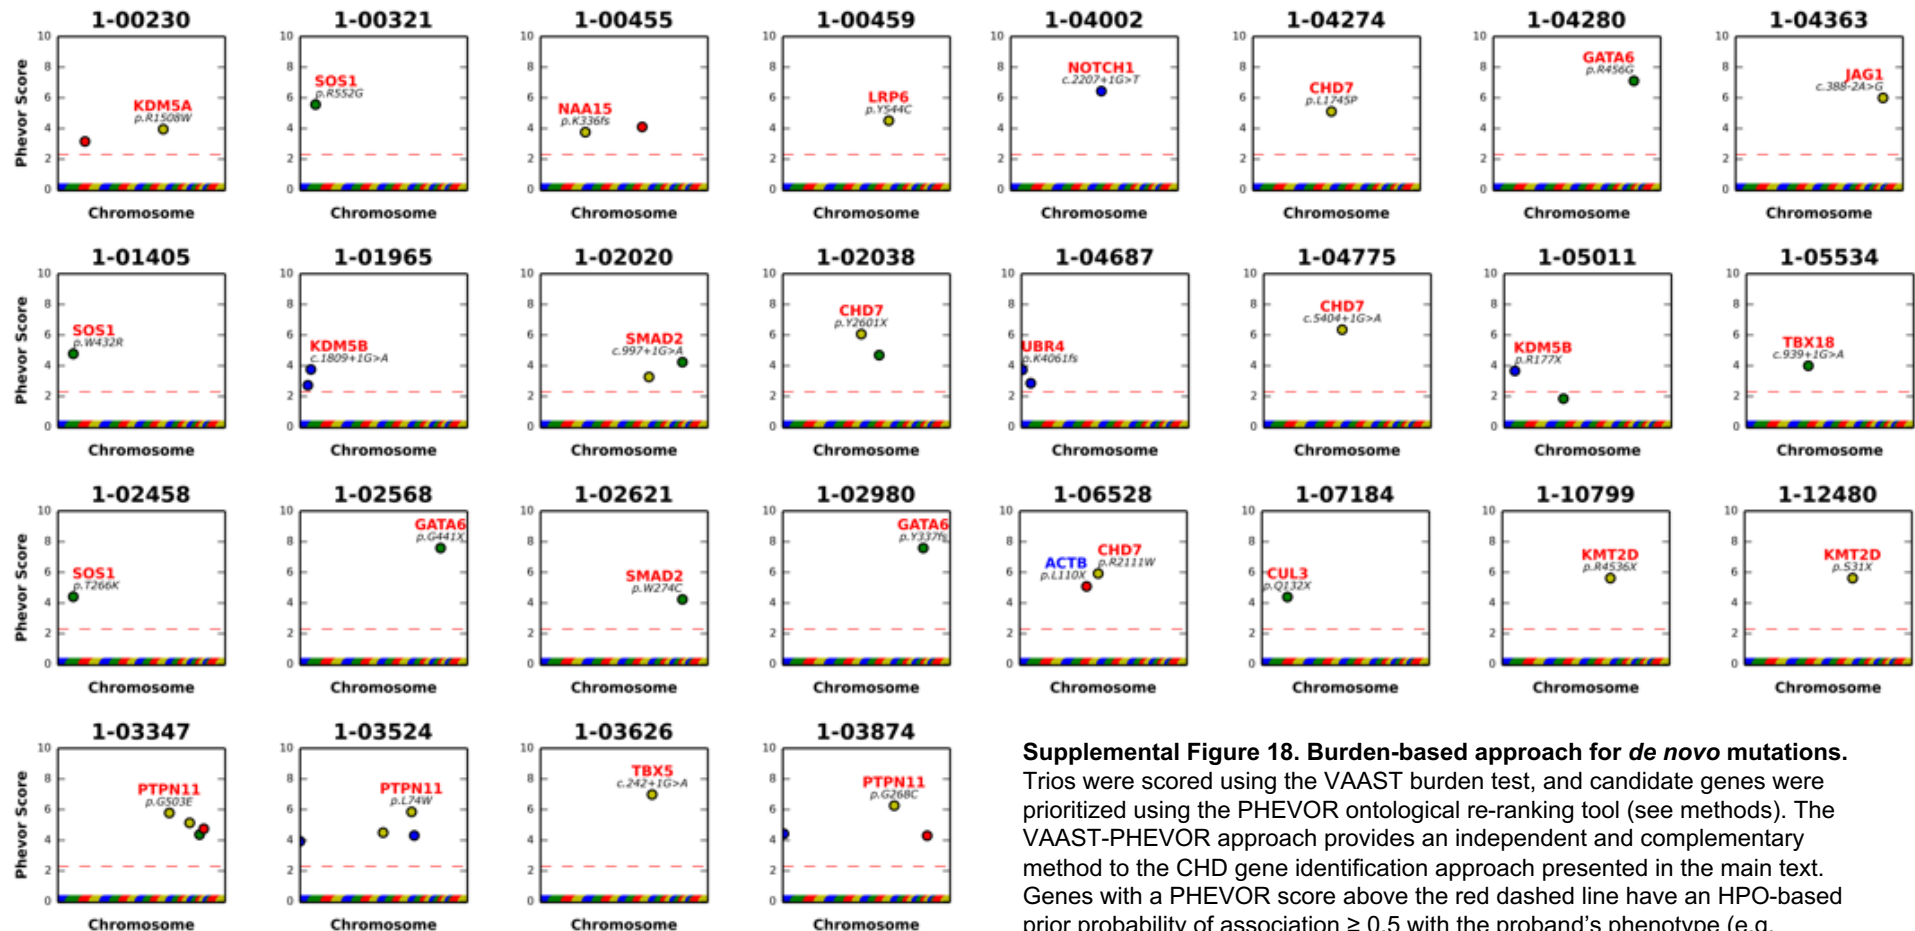

**Supplemental Figure 18. Burden-based approach for *de novo* mutations.** Trios were scored using the VAAST burden test, and candidate genes were prioritized using the PHEVOR ontological re-ranking tool (see methods). The VAAST-PHEVOR approach provides an independent and complementary method to the CHD gene identification approach presented in the main text. Genes with a PHEVOR score above the red dashed line have an HPO-based prior probability of association  $\geq 0.5$  with the proband's phenotype (e.g. conotruncal, left outflow obstruction, heterotaxy, etc.) and a VAAST p-value of  $\leq 0.005$ .

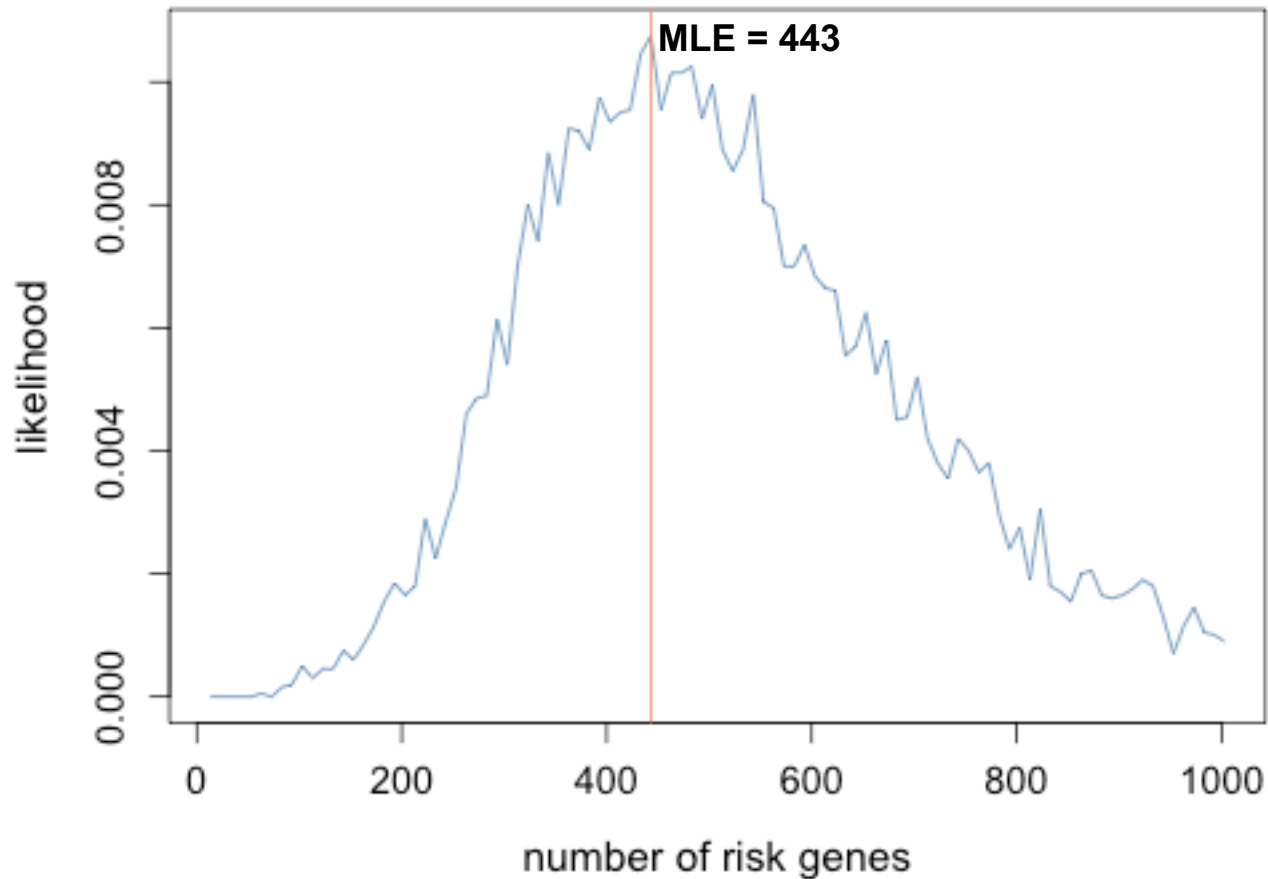

**Supplementary Figure 19. Estimation of the number of congenital heart disease risk genes.** Monte Carlo simulation was performed based on observed damaging *de novo* mutations in the top 25% of high heart expressed genes using 20,000 iterations. Because this likelihood based approach assumes the penetrance of all damaging *de novo* mutations in all risk genes is identical, *CHD7*, *KMT2D*, and *PTPN11* were removed from the simulation due to each having  $\geq 9$  damaging *de novo* mutations. These three genes were added to the optimum estimate for the number of the risk genes later. We estimate that the number of risk genes via *de novo* events is  $\sim 443$  (95% confidence interval: [154.1, 731.9]).

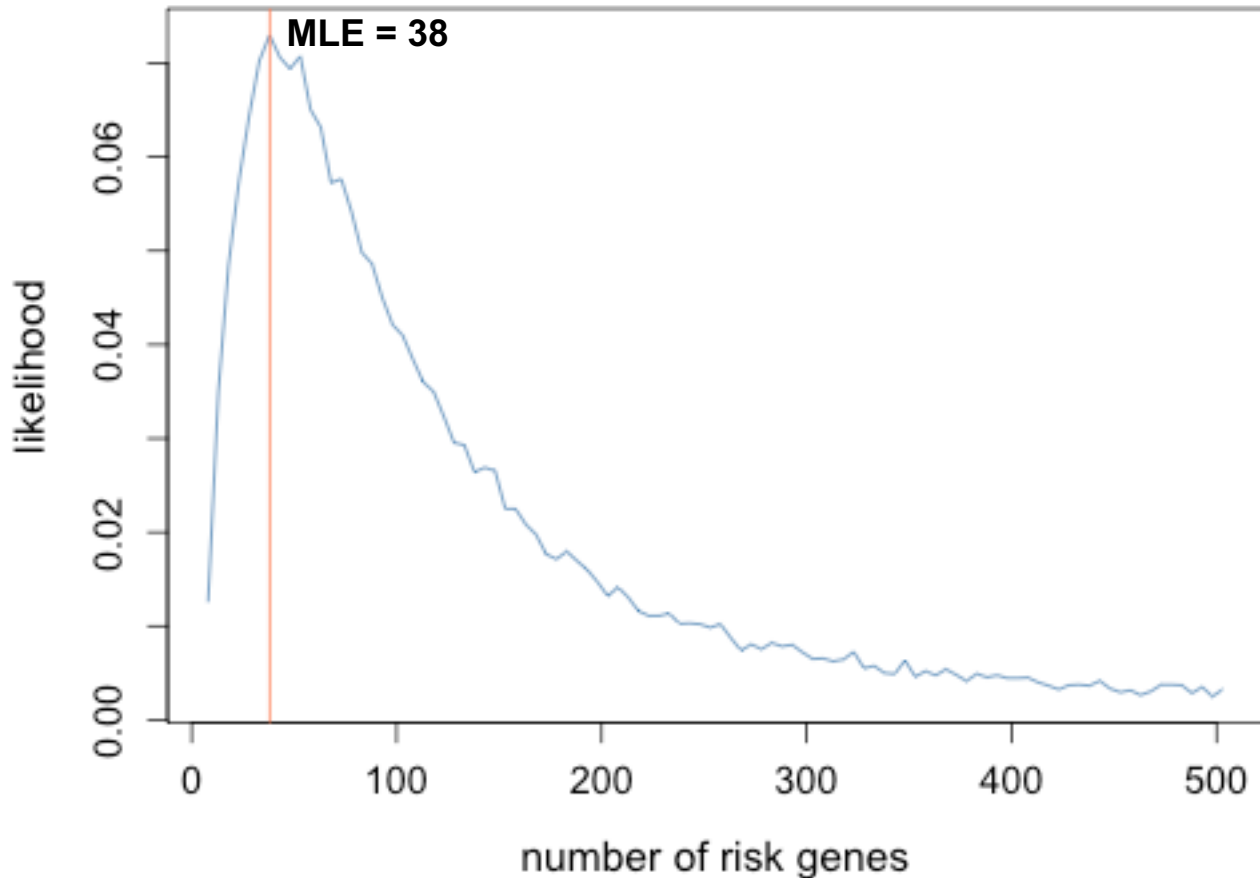

**Supplementary Figure 20. Estimation of the number of chromatin modification genes contributing to congenital heart disease.** Monte Carlo simulation was performed based on observed damaging *de novo* mutations in 546 chromatin modification genes (GO:0016569) using 20,000 iterations. Because this likelihood based approach assumes the penetrance of all damaging *de novo* mutations in all risk genes is identical, *CHD7*, *KMT2D*, and *NSD1* were removed from the simulation due to each having  $\geq 5$  damaging *de novo* mutations. These three genes were added to the optimum estimate for the number of the risk genes later. We estimate that the number of chromatin modification genes contributing to CHD via *de novo* events is  $\sim 38$  (95% confidence interval: [7, 69]).

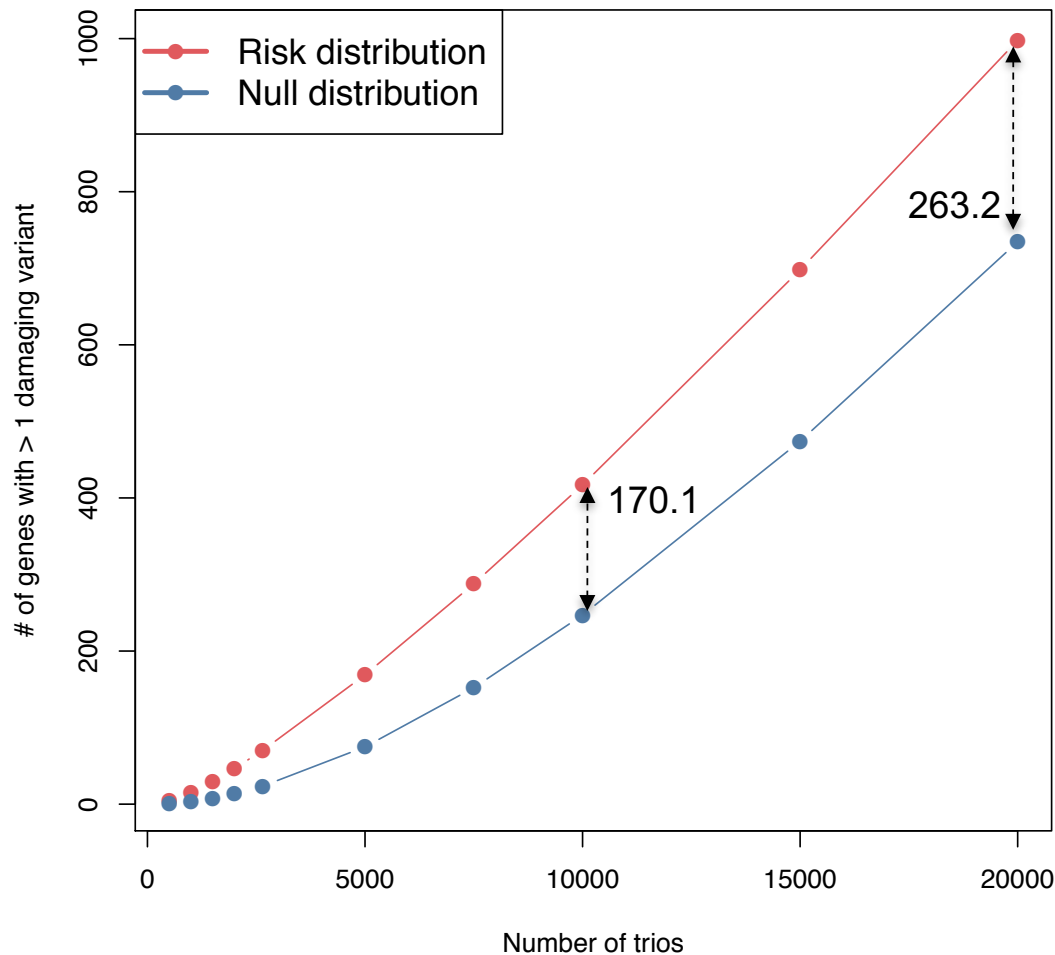

**Supplementary Figure 21. Estimation of the number of recurrent genes.** The number of trios and the number of genes with more than one damaging *de novo* mutation are specified on the x and y-axis, respectively. The expected number of risk genes was determined by Monte Carlo simulation to be ~443. We modeled the expected rate of damaging *de novo* mutations in cases (red, risk distribution) and controls (blue, null distribution) given an increasing sample size. A total of 10,000 iterations were performed to estimate the number of genes with more than 1 damaging *de novo* mutations taking into account of the damaging *de novo* mutation probability. WES of 10,000 and 20,000 trios will yield a 38.4% and 59.4 % saturation for all CHD risk genes.

**Supplementary Table 1. Number of studied cases and controls**

| Category             | N     |
|----------------------|-------|
| # of case trios      | 2,645 |
| # of case singletons | 226   |
| # of control trios   | 1,789 |

N: Number of case trios and singletons, and control trios.

**Supplementary Table 2. Demographic characteristics of CHD cases and controls**

|                    | CHD Cases     | Autism Sibling Controls |
|--------------------|---------------|-------------------------|
| <b>Sample size</b> | 2,871         | 1,789                   |
| <b>Gender</b>      |               |                         |
| Male               | 1,691 (58.9%) | 840 (47.0%)             |
| Female             | 1,180 (41.1%) | 949 (53.0%)             |
| <b>Ethnicity</b>   |               |                         |
| European           | 2,063 (71.9%) | 1,408 (78.7%)           |
| African American   | 189 (6.6%)    | 79 (4.4%)               |
| East Asian         | 36 (1.3%)     | 41 (2.3%)               |
| South Asian        | 136 (4.7%)    | 87 (4.9%)               |
| Mexican            | 280 (9.8%)    | 125 (7.0%)              |
| Other              | 167 (5.8%)    | 49 (2.7%)               |

The number of samples is shown in each category with the corresponding percentage in parentheses. Ethnicity is determined by principal component analysis compared to HapMap samples using EIGENSTRAT (see **Online Methods**).

**Supplementary Table 3a. Cardiac lesions in 2,871 probands**

|                                                                    |             |
|--------------------------------------------------------------------|-------------|
| <b>Conotruncal Defects (CTD): 872 probands</b>                     |             |
| Tetralogy of Fallot                                                | 416 (14.5%) |
| Double-Outlet Right Ventricle                                      | 68 (2.4%)   |
| Truncus Arteriosus                                                 | 68 (2.4%)   |
| Ventricular Septal Defect (conoventricular)                        | 119 (4.1%)  |
| Aortic Arch Abnormalities                                          | 71 (2.5%)   |
| Pulmonary Stenosis/Atresia                                         | 128 (4.5%)  |
| Other                                                              | 11 (0.4%)   |
| <b>D-Transposition of the Great Arteries (D-TGA): 251 probands</b> |             |
| Isolated D-Transposition of the Great Arteries                     | 74 (2.6%)   |
| Ventricular Septal Defect                                          | 175 (6.1%)  |
| Coarctation                                                        | 26 (0.9%)   |
| Double-Outlet Right Ventricle                                      | 26 (0.9%)   |
| <b>Heterotaxy (HTX): 272 probands</b>                              |             |
| L-Transposition of the Great Arteries                              | 119 (4.1%)  |
| Double-Outlet Right Ventricle                                      | 88 (3.1%)   |
| Atrio-Ventricular Canal Defect                                     | 82 (2.9%)   |
| Anomalous Pulmonary Veins                                          | 61 (2.1%)   |
| Dextrocardia                                                       | 78 (2.7%)   |
| Right or Left Atrial Isomerism                                     | 77 (2.7%)   |
| <b>Left Ventricular Obstruction (LVO): 797 probands</b>            |             |
| Bicuspid Aortic Valve-Aortic Stenosis                              | 259 (9.0%)  |
| Coarctation                                                        | 285 (9.9%)  |
| Hypoplastic Left Heart Syndrome                                    | 293 (10.2%) |
| Other                                                              | 99 (3.4%)   |
| <b>Other phenotypes: 679 probands</b>                              |             |
| Atrial Septal Defect                                               | 337 (11.7%) |
| Ventricular Septal Defect                                          | 122 (4.2%)  |
| Atrio-Ventricular Canal Defect                                     | 107 (3.7%)  |
| Tricuspid Atresia                                                  | 47 (1.6%)   |
| Double Inlet Left Ventricle                                        | 22 (0.8%)   |
| Anomalous Pulmonary Veins                                          | 92 (3.2%)   |
| Coronary Artery Abnormalities                                      | 19 (0.7%)   |
| Ebstein's Anomaly                                                  | 39 (1.4%)   |

**Supplemental Table 3b. Distribution of EA and NDD phenotype in CHD cases**

| Group               | 2,871 Probands | 2,645 Trios |
|---------------------|----------------|-------------|
| NDD status obtained | 1,844          | 1,708       |
| NDD positive        | 577            | 561         |
| EA status obtained  | 2,840          | 2,614       |
| EA positive         | 998            | 935         |
| EA and NDD          | 231            | 222         |
| EA or NDD           | 1,344          | 1,274       |

NDD: neurodevelopmental deficit; EA: extracardiac congenital anomalies pertaining to structural defect outside of heart; Those probands who did not have obtainable NDD or EA status were excluded from the above tabulation

**Supplemental Table 3c. Clinical syndromes diagnosed among probands prior to sequencing**

| Syndrome                       | N  |
|--------------------------------|----|
| Alagille                       | 2  |
| CHARGE                         | 5  |
| Suspect DiGeorge (no del22q11) | 8  |
| Suspect Down (no tri 21)       | 3  |
| Ehlers-Danlos                  | 2  |
| Ellis van Creveld              | 1  |
| Goldenhar                      | 6  |
| Holt-Oram                      | 6  |
| Kabuki                         | 3  |
| Marfan                         | 1  |
| Noonan                         | 17 |
| VATER/VACTERL                  | 28 |



**Supplementary Table 4. Summary sequencing statistics for the CHD and control cohorts**

| Category                                  | Cases<br>(Roche V2; N=5,433) | Cases<br>(MedExome; N=2,728) <sup>&amp;</sup> | Controls<br>(Roche V2; N=5,367) |
|-------------------------------------------|------------------------------|-----------------------------------------------|---------------------------------|
| Read length (bp)                          | 74                           | 74/99                                         | 50-94                           |
| # of reads per sample (M)                 | 75.3                         | 52.6*                                         | 99.7                            |
| Median coverage at each targeted base (X) | 62.7                         | 35.0*                                         | 67.0                            |
| Mean coverage at each targeted base (X)   | 74.9                         | 40.7*                                         | 79.1                            |
| % of all reads that map to target         | 69.2%                        | 48.7%*                                        | 57.6%                           |
| % of all bases that map to target         | 59.0%                        | 38.8%*                                        | 49.0%                           |
| % of targeted bases read at least 8x      | 94.9%                        | 96.3%*                                        | 94.6%                           |
| % of targeted bases read at least 10x     | 93.7%                        | 94.9%*                                        | 93.4%                           |
| % of targeted bases read at least 15x     | 90.0%                        | 89.2%*                                        | 89.9%                           |
| % Mean error rate                         | 0.3%                         | 0.4%*                                         | 0.4%                            |

<sup>&</sup>2,728 case samples were sequenced using the MedExome capture reagent. All other samples were sequenced using the Roche V2 capture reagent. 8X, 10X and 15X were comparable across the platforms. A Wilcox rank sum test was performed to determine whether there is statistically significant difference of sequencing metrics between V2-captured samples and MedExome-captured samples in cases. \* denotes Wilcox p-value < 0.05.

**Supplemental Table 5. 51 damaging recessive genotypes in known CHD genes in CHD cases**

| ID                                                     | Gene           | AA Change                 | Type   | Ethnicity-specific ExAC Freq               | OMIM Inheritance Pattern | OMIM Cardiac Phenotype | Patient Diagnosis  | Cardiac Phenotype Concordant | Extracardiac | Neuro |
|--------------------------------------------------------|----------------|---------------------------|--------|--------------------------------------------|--------------------------|------------------------|--------------------|------------------------------|--------------|-------|
| <b>Genes with known recessive transmission pattern</b> |                |                           |        |                                            |                          |                        |                    |                              |              |       |
| 1-13318                                                | <i>COL1A2</i>  | p.Val416Ile               | Hom    | 0                                          | Monoallelic/Biallelic    | Ehlers-Danlos          | CTD                | No                           | Yes          | n/a   |
| 1-00532                                                | <i>GDF1</i>    | p.Met364Thr               | Hom    | 5.6×10 <sup>-3</sup>                       | Monoallelic/Biallelic    | DORV, RAI, TOF, D-TGA  | HTX                | Yes                          | No           | Yes   |
| 1-00620                                                | <i>GDF1</i>    | p.Met364Thr               | Hom    | 5.6×10 <sup>-3</sup>                       | Monoallelic/Biallelic    | DORV, RAI, TOF, D-TGA  | CTD (TGA)          | Yes                          | Yes          | No    |
| 1-00862                                                | <i>GDF1</i>    | p.Met364Thr               | Hom    | 5.6×10 <sup>-3</sup>                       | Monoallelic/Biallelic    | DORV, RAI, TOF, D-TGA  | HTX                | Yes                          | Yes          | Yes   |
| 1-01815                                                | <i>GDF1</i>    | p.Met364Thr               | Hom    | 5.6×10 <sup>-3</sup>                       | Monoallelic/Biallelic    | DORV, RAI, TOF, D-TGA  | CTD (TGA)          | Yes                          | No           | n/a   |
| 1-02374                                                | <i>GDF1</i>    | p.Met364Thr               | Hom    | 5.6×10 <sup>-3</sup>                       | Monoallelic/Biallelic    | DORV, RAI, TOF, D-TGA  | CTD (TGA)          | Yes                          | No           | n/a   |
| 1-02504                                                | <i>GDF1</i>    | p.Met364Thr               | Hom    | 5.6×10 <sup>-3</sup>                       | Monoallelic/Biallelic    | DORV, RAI, TOF, D-TGA  | CTD                | Yes                          | No           | No    |
| 1-02531                                                | <i>GDF1</i>    | p.Met364Thr               | Hom    | 5.6×10 <sup>-3</sup>                       | Monoallelic/Biallelic    | DORV, RAI, TOF, D-TGA  | CTD                | Yes                          | No           | No    |
| 1-04480                                                | <i>GDF1</i>    | p.Met364Thr               | Hom    | 5.6×10 <sup>-3</sup>                       | Monoallelic/Biallelic    | DORV, RAI, TOF, D-TGA  | HTX                | Yes                          | No           | Yes   |
| 1-06122                                                | <i>GDF1</i>    | p.Met364Thr               | Hom    | 5.6×10 <sup>-3</sup>                       | Monoallelic/Biallelic    | DORV, RAI, TOF, D-TGA  | CTD                | Yes                          | No           | No    |
| 1-06789                                                | <i>GDF1</i>    | p.Met364Thr               | Hom    | 5.6×10 <sup>-3</sup>                       | Monoallelic/Biallelic    | DORV, RAI, TOF, D-TGA  | CTD                | Yes                          | No           | No    |
| 1-05386                                                | <i>GDF1</i>    | p.Met364del/p.Cys227*     | CmpHet | 0/0                                        | Monoallelic/Biallelic    | DORV, RAI, TOF, D-TGA  | HTX                | Yes                          | No           | No    |
| 1-00240                                                | <i>ARMC4</i>   | p.Arg286fs                | Hom    | 6.0×10 <sup>-4</sup>                       | Biallelic                | HTX                    | HTX                | Yes                          | No           | No    |
| 1-00129                                                | <i>ATIC</i>    | c.1227+2T>A/p.Lys426Arg   | CmpHet | 0/3.0×10 <sup>-5</sup>                     | Biallelic                | ASD                    | CTD (TGA)          | No                           | Yes          | Yes   |
| 1-01055                                                | <i>ATIC</i>    | p.Thr329Ile               | Hom    | 0                                          | Biallelic                | ASD                    | HTX                | No                           | No           | No    |
| 1-05775                                                | <i>BBS1</i>    | p.Gly394Asp/p.Arg462His   | CmpHet | 2.8×10 <sup>-3</sup> /0                    | Biallelic                | Rare, broad spectrum   | AVC                | N/A                          | No           | No    |
| 1-05059                                                | <i>BBS10</i>   | p.Tyr589*                 | Hom    | 0                                          | Biallelic                | Rare, HTX              | HTX                | Yes                          | Yes          | n/a   |
| 1-05476                                                | <i>C5orf42</i> | p.Asp563Val               | Hom    | 0                                          | Biallelic                | Rare, broad spectrum   | CTD                | N/A                          | No           | n/a   |
| 1-02315                                                | <i>DNAAF1</i>  | p.Gln94fs/p.Leu494fs      | CmpHet | 0/0                                        | Biallelic                | HTX                    | HTX                | Yes                          | No           | No    |
| 1-13221                                                | <i>DNAH11</i>  | p.Gln3166Arg              | Hom    | 0                                          | Biallelic                | HTX                    | CTD                | No                           | No           | n/a   |
| 1-00803                                                | <i>DNAH5</i>   | p.Arg4496*/p.Ile1855fs    | CmpHet | 0/0                                        | Biallelic                | HTX                    | ASD, VSD, cleft MV | No                           | No           | Yes   |
| 1-02956                                                | <i>DNAH5</i>   | p.Arg3539Cys/c.8011-1G>A  | CmpHet | 0/0                                        | Biallelic                | HTX                    | HTX                | Yes                          | Yes          | Yes   |
| 1-05359                                                | <i>DNAH5</i>   | p.Asp3605fs/p.Cys408Arg   | CmpHet | 1.0×10 <sup>-4</sup> /0                    | Biallelic                | HTX                    | HTX                | Yes                          | Yes          | n/a   |
| 1-07573                                                | <i>DNAI2</i>   | p.Ala54fs                 | Hom    | 0                                          | Biallelic                | Situs inversus         | LVO                | No                           | No           | No    |
| 1-06387                                                | <i>DYNC2H1</i> | p.Leu1931Met/p.Val2069Ala | CmpHet | 2.0×10 <sup>-4</sup> /0                    | Biallelic                | TGA                    | HTX                | No                           | No           | Yes   |
| 1-00612                                                | <i>IFT140</i>  | p.Cys768Tyr/p.Arg505*     | CmpHet | 1.5×10 <sup>-5</sup> /0                    | Biallelic                | Rare, broad range      | LVO                | N/A                          | No           | No    |
| 1-05014                                                | <i>NPHP3</i>   | p.Gly1299Asp              | Hom    | 8.0×10 <sup>-4</sup>                       | Biallelic                | HTX                    | LVO                | No                           | No           | No    |
| 1-06780                                                | <i>STAMBP</i>  | p.Thr351Ala               | Hom    | 0                                          | Biallelic                | ASD/VSD                | ASD                | Yes                          | Yes          | Yes   |
| 1-01687                                                | <i>DAW1</i>    | p.Ser364Thr               | Hom    | 6.6×10 <sup>-5</sup>                       | Biallelic                | HTX                    | HTX                | Yes                          | No           | No    |
| 1-06817                                                | <i>DAW1</i>    | p.Leu66*/p.Trp372Cys      | CmpHet | 0/0                                        | Biallelic                | HTX                    | LVO                | No                           | Yes          | n/a   |
| 1-05375                                                | <i>MYH10</i>   | p.Glu1738Lys              | Hom    | 9.0×10 <sup>-5</sup>                       | Biallelic                | CTD                    | CTD                | Yes                          | Yes          | No    |
| 1-06101                                                | <i>PKD1L1</i>  | p.Gln2527*/p.Arg284*      | CmpHet | 3.9×10 <sup>-5</sup> /0                    | Biallelic                | HTX                    | HTX                | Yes                          | Yes          | n/a   |
| 1-06808                                                | <i>LRP1</i>    | p.Val315Ala/p.Arg1734His  | CmpHet | 0/1.5×10 <sup>-5</sup>                     | Biallelic                | CTD                    | CTD                | Yes                          | No           | Yes   |
| 1-01111                                                | <i>LRP1</i>    | p.Ser2907Leu/p.Ala3634Thr | CmpHet | 1.5×10 <sup>-5</sup> /1.1×10 <sup>-3</sup> | Biallelic                | CTD                    | CTD                | Yes                          | Yes          | n/a   |

| ID                                             | Gene          | AA Change                | Type   | Ethnicity-specific ExAC Freq               | OMIM Inheritance Pattern | OMIM Cardiac Phenotype               | Patient Diagnosis | Cardiac Phenotype Concordant | Extracardiac | Neuro |
|------------------------------------------------|---------------|--------------------------|--------|--------------------------------------------|--------------------------|--------------------------------------|-------------------|------------------------------|--------------|-------|
| Genes with known dominant transmission pattern |               |                          |        |                                            |                          |                                      |                   |                              |              |       |
| 1-00688                                        | <i>CHD7</i>   | c.1717-1G>A              | Hom    | 1.0×10 <sup>-4</sup>                       | Monoallelic              | CTD                                  | CTD               | Yes                          | Yes          | n/a   |
| 1-00875                                        | <i>COL1A1</i> | p.Ala628Thr/p.Arg528His  | CmpHet | 2.0×10 <sup>-4</sup> /9.0×10 <sup>-5</sup> | Monoallelic              | Mitral valve prolapse, Ao dilatation | HTX               | No                           | Yes          | No    |
| 1-02287                                        | <i>COL5A2</i> | p.Arg1070His/p.Pro706Leu | CmpHet | 4.0×10 <sup>-4</sup> /8.0×10 <sup>-4</sup> | Monoallelic              | Mitral valve prolapse, Ao dilatation | CTD               | No                           | No           | n/a   |
| 1-04062                                        | <i>COL5A2</i> | p.Arg356Gln              | Hom    | 0                                          | Monoallelic              | Mitral valve prolapse, Ao dilatation | HTX               | No                           | No           | n/a   |
| 1-06907                                        | <i>FBN2</i>   | p.Asp2493Asn             | Hom    | 1.2×10 <sup>-3</sup>                       | Monoallelic              | Mitral valve prolapse, Ao dilatation | CTD               | No                           | Yes          | Yes   |
| 1-00051                                        | <i>MYH6</i>   | p.Lys1932*/p.Ala1891Thr  | CmpHet | 3.0×10 <sup>-5</sup> /0                    | Monoallelic              | ASD, cardiomyopathy                  | LVO               | No                           | No           | Yes   |
| 1-01407                                        | <i>MYH6</i>   | p.Glu98Lys               | Hom    | 3.0×10 <sup>-4</sup>                       | Monoallelic              | ASD, cardiomyopathy                  | D-TGA             | No                           | Yes          | Yes   |
| 1-04847                                        | <i>MYH6</i>   | p.Arg1899His/p.Asn598fs  | CmpHet | 0/0                                        | Monoallelic              | ASD, cardiomyopathy                  | LVO               | No                           | No           | No    |
| 1-05009                                        | <i>MYH6</i>   | p.Ala1327Val/p.Leu388Phe | CmpHet | 2.7×10 <sup>-3</sup> /0                    | Monoallelic              | ASD, cardiomyopathy                  | AVC               | No                           | No           | n/a   |
| 1-06399                                        | <i>MYH6</i>   | p.Gly585Ser/p.Ile512Thr  | CmpHet | 2.0×10 <sup>-4</sup> /3.0×10 <sup>-5</sup> | Monoallelic              | ASD, cardiomyopathy                  | LVO               | No                           | No           | n/a   |
| 1-06876                                        | <i>MYH6</i>   | p.Ile1068Thr/c.3979-2A>C | CmpHet | 1.5×10 <sup>-5</sup> /2.0×10 <sup>-5</sup> | Monoallelic              | ASD, cardiomyopathy                  | LVO               | No                           | No           | No    |
| 1-07343                                        | <i>MYH6</i>   | p.Arg1610Cys             | Hom    | 3.0×10 <sup>-5</sup>                       | Monoallelic              | ASD, cardiomyopathy                  | ASD/VSD           | Yes                          | No           | n/a   |
| 1-06058                                        | <i>NOTCH1</i> | p.Pro284Leu/p.Thr123Met  | CmpHet | 2.0×10 <sup>-4</sup> /1.3×10 <sup>-3</sup> | Monoallelic              | LVO                                  | LVO               | Yes                          | Yes          | Yes   |
| 1-05499                                        | <i>NOTCH1</i> | p.Phe1773fs/p.Thr123Met  | CmpHet | 0//1.3×10 <sup>-3</sup>                    | Monoallelic              | LVO                                  | CTD               | No                           | No           | Yes   |
| 1-01387                                        | <i>NSD1</i>   | p.Phe621Val/p.Gln990His  | CmpHet | 0/1.5×10 <sup>-5</sup>                     | Monoallelic              | Cardiomyopathy                       | PA/IVS            | No                           | No           | Yes   |
| 1-07598                                        | <i>TSC2</i>   | p.Val1673Leu             | Hom    | 0                                          | Monoallelic              | Cardiac rhabdomyosarcoma, WPW        | LVO               | No                           | Yes          | No    |
| 1-00395                                        | <i>DGCR2</i>  | p.Thr152Ser              | Hom    | 1.0×10 <sup>-3</sup>                       | Monoallelic              | CTD                                  | D-TGA             | No                           | Yes          | Yes   |

CTD: Conotruncal defects; HTX: Heterotaxy; LVO: Left ventricular hypertrophy; TGA: Transposition of the great arteries; D-TGA: D-transposition of the great arteries ; ASD: Atrial septal defect; TOF: Tetralogy of Fallot; DORV: Double outlet right ventricle; WPW: Wolff-Parkinson-White; PA/IVS: Pulmonary atresia with intact ventricular septum; VSD: ventricular septal defect; RAI: Right atrial isomerism. 'Hom' denotes homozygous variants and 'CmpHet' denotes compound heterozygous variants.

**Supplementary Table 6a. Recessive analysis when separately modeling homozygous and compound heterozygous variants in 2,871 CHD cases**

| Gene set (# genes)                   | Observed      |                         |                |                       | Expected              | Enrichment  | Meta P-value                |
|--------------------------------------|---------------|-------------------------|----------------|-----------------------|-----------------------|-------------|-----------------------------|
|                                      | # homozygotes | # compound heterozygous | # unique genes | # recessive genotypes | # recessive genotypes |             |                             |
| All genes (18,989)                   | 265           | 202                     | 391            | 467                   | -                     | -           | -                           |
| Recessive Known Human (96)           | 19            | 10                      | 16             | 29                    | 6.75                  | <b>4.29</b> | <b>1.2×10<sup>-10</sup></b> |
| Recessive Known Mouse or Human (137) | 21            | 13                      | 19             | 34                    | 11.53                 | <b>2.95</b> | <b>3.6×10<sup>-8</sup></b>  |
| Known Mouse or Human CHD (253)       | 28            | 23                      | 28             | 51                    | 26.24                 | <b>1.94</b> | <b>5.9×10<sup>-6</sup></b>  |

**Supplementary Table 6b. Recessive analysis when separately modeling homozygous and compound heterozygous variants in 1,789 controls**

| Gene set (# genes)                   | Observed      |                         |                |                       | Expected              | Enrichment | Meta P-value |
|--------------------------------------|---------------|-------------------------|----------------|-----------------------|-----------------------|------------|--------------|
|                                      | # homozygotes | # compound heterozygous | # unique genes | # recessive genotypes | # recessive genotypes |            |              |
| All genes (18,989)                   | 22            | 131                     | 146            | 165                   | -                     | -          | -            |
| Recessive Known Human (96)           | 0             | 0                       | 0              | 0                     | 2.98                  | 0          | 1            |
| Recessive Known Mouse or Human (137) | 1             | 1                       | 2              | 2                     | 5.48                  | 0.36       | 0.97         |
| Known Mouse or Human CHD (253)       | 2             | 3                       | 5              | 5                     | 12.58                 | 0.40       | 1            |

The expected number of homozygous variant was determined by multiplying the total number of homozygotes by the sum of damaging *de novo* probabilities of the gene set divided by the sum of all probabilities. The expected number of compound heterozygous variants was determined by multiplying the total number of compound heterozygous variants by the sum of the square of damaging *de novo* probabilities of the gene set divided by the sum of the square of all probabilities. The binomial test was performed to evaluate the enrichment of total RGs. Values in bold are p-values exceeding Bonferroni multiple testing cutoff =  $0.05/(3 \times 2) = 8.3 \times 10^{-3}$ .

**Supplementary Table 7a. Damaging recessive genotypes in known CHD genes in 161 probands consanguineous by genotype**

| Gene set (# genes)                   | Observed      |                         |                |                       | Expected              | Enrichment  | P-value                    |
|--------------------------------------|---------------|-------------------------|----------------|-----------------------|-----------------------|-------------|----------------------------|
|                                      | # homozygotes | # compound heterozygous | # unique genes | # recessive genotypes | # recessive genotypes |             |                            |
| All genes (18,989)                   | 211           | 7                       | 210            | 218                   | -                     | -           | -                          |
| Recessive Known Human (96)           | 12            | 1                       | 9              | 13                    | 2.42                  | <b>5.37</b> | <b>1.3×10<sup>-6</sup></b> |
| Recessive Known Mouse or Human (137) | 14            | 1                       | 11             | 15                    | 3.76                  | <b>3.99</b> | <b>7.3×10<sup>-6</sup></b> |
| Known Mouse or Human CHD (253)       | 19            | 2                       | 16             | 21                    | 8.31                  | <b>2.53</b> | <b>1.1×10<sup>-4</sup></b> |

**Supplementary Table 7b. Damaging recessive genotypes in known CHD genes in 2,710 non-consanguineous probands by genotype**

| Gene set (# genes)                   | Observed      |                         |                |                       | Expected              | Enrichment  | P-value                    |
|--------------------------------------|---------------|-------------------------|----------------|-----------------------|-----------------------|-------------|----------------------------|
|                                      | # homozygotes | # compound heterozygous | # unique genes | # recessive genotypes | # recessive genotypes |             |                            |
| All genes (18,989)                   | 54            | 195                     | 202            | 249                   | -                     | -           | -                          |
| Recessive Known Human (96)           | 7             | 9                       | 9              | 16                    | 4.12                  | <b>3.89</b> | <b>5.3×10<sup>-6</sup></b> |
| Recessive Known Mouse or Human (137) | 7             | 12                      | 11             | 19                    | 7.12                  | <b>2.67</b> | <b>1.2×10<sup>-4</sup></b> |
| Known Mouse or Human CHD (253)       | 9             | 21                      | 17             | 30                    | 16.40                 | <b>1.83</b> | <b>1.1×10<sup>-3</sup></b> |

The expected number of recessive genotypes was determined based on fitted values from the polynomial regression model using the damaging *de novo* probabilities. P-values were calculated using the one-tailed binomial probability. The haplotype phase was performed using Beagle v.3.3.2. Consanguinity was defined as a an estimated autozygosity of at least 0.35% of the genome in 2cM or greater homozygous segments (see **Supplementary Note**).

**Supplementary Table 8. Damaging recessive genotypes in known CHD genes after removal of nine of ten probands carrying the *GDF1* founder mutation**

| Gene set (# genes)                   | Observed      |                         |                |                       | Expected              | Enrichment  | P-value                    |
|--------------------------------------|---------------|-------------------------|----------------|-----------------------|-----------------------|-------------|----------------------------|
|                                      | # homozygotes | # compound heterozygous | # unique genes | # recessive genotypes | # recessive genotypes |             |                            |
| All genes (18,989)                   | 256           | 202                     | 391            | 458                   | -                     | -           | -                          |
| Recessive Known Human (96)           | 10            | 10                      | 16             | 20                    | 6.60                  | <b>3.03</b> | <b>1.6×10<sup>-5</sup></b> |
| Recessive Known Mouse or Human (137) | 12            | 13                      | 19             | 25                    | 10.99                 | <b>2.27</b> | <b>1.6×10<sup>-4</sup></b> |
| Known Mouse or Human CHD (253)       | 19            | 23                      | 28             | 42                    | 25.01                 | <b>1.68</b> | <b>8.4×10<sup>-4</sup></b> |

The expected number of recessive genotypes was determined based on fitted values from the polynomial regression model using the damaging *de novo* probabilities. P-values were calculated using the one-tailed binomial probability.

**Supplementary Table 9. Two genes show an excess of recessive genotypes in cases by the polynomial approach**

| Gene         | Observed # RG | Expected # RG | Enrichment   | P-value                     | HHE Rank     |
|--------------|---------------|---------------|--------------|-----------------------------|--------------|
| <b>GDF1*</b> | <b>11</b>     | <b>0.016</b>  | <b>692.6</b> | <b>3.6×10<sup>-28</sup></b> | <b>N/A</b>   |
| <b>MYH6*</b> | <b>7</b>      | <b>0.482</b>  | <b>14.5</b>  | <b>7.6×10<sup>-7</sup></b>  | <b>100.0</b> |
| EPB41L4A     | 3             | 0.074         | 40.7         | 6.3×10 <sup>-5</sup>        | 61.0         |
| HEPHL1       | 4             | 0.209         | 19.1         | 6.7×10 <sup>-5</sup>        | 10.3         |
| DAW1*        | 2             | 0.013         | 159.1        | 7.8×10 <sup>-5</sup>        | 16.8         |
| CD36&        | 2             | 0.017         | 119.8        | 1.4×10 <sup>-4</sup>        | 84.7         |
| PPEF2        | 2             | 0.018         | 112.7        | 1.6×10 <sup>-4</sup>        | 16.3         |
| H6PD         | 3             | 0.106         | 28.4         | 1.8×10 <sup>-4</sup>        | 70.4         |
| OR2AG2       | 1             | 0.000         | 3884.3       | 2.6×10 <sup>-4</sup>        | 0.0          |
| OR52N2       | 1             | 0.000         | 2422.5       | 4.1×10 <sup>-4</sup>        | 0.0          |
| KEL          | 2             | 0.034         | 58.1         | 5.8×10 <sup>-4</sup>        | 35.2         |
| OR5J2        | 1             | 0.001         | 1549.1       | 6.5×10 <sup>-4</sup>        | 0.0          |
| KRT72        | 2             | 0.038         | 52.1         | 7.2×10 <sup>-4</sup>        | 0.0          |
| CAPN14       | 2             | 0.038         | 52.0         | 7.2×10 <sup>-4</sup>        | N/A          |
| F11          | 2             | 0.044         | 45.6         | 9.3×10 <sup>-4</sup>        | 14.4         |
| ATIC*        | 2             | 0.045         | 44.9         | 9.6×10 <sup>-4</sup>        | 79.8         |
| FUT2         | 2             | 0.045         | 44.2         | 9.9×10 <sup>-4</sup>        | 22.6         |
| MFGE8&       | 2             | 0.050         | 39.6         | 1.2×10 <sup>-3</sup>        | 89.2         |
| PROC         | 2             | 0.052         | 38.4         | 1.3×10 <sup>-3</sup>        | 0.0          |
| RIPPLY3      | 1             | 0.001         | 721.4        | 1.4×10 <sup>-3</sup>        | 33.7         |
| FAM151B      | 1             | 0.001         | 719.9        | 1.4×10 <sup>-3</sup>        | 31.7         |
| HEXA         | 2             | 0.054         | 37.1         | 1.4×10 <sup>-3</sup>        | 74.6         |
| OR5AC2       | 1             | 0.002         | 617.5        | 1.6×10 <sup>-3</sup>        | 0.0          |
| OR2F2        | 1             | 0.002         | 521.4        | 1.9×10 <sup>-3</sup>        | 0.0          |
| TMEM134      | 1             | 0.002         | 467.6        | 2.1×10 <sup>-3</sup>        | N/A          |

Enrichment and p-value were calculated using the binomial probability adjusted for fitted values from the polynomial model using damaging *de novo* probability. Genes bolded exceed multiple testing cutoff =  $0.05/(18,989) = 2.6 \times 10^{-6}$ . (\*) denotes known Human and Mouse CHD genes and (&) denotes genes with a p-value  $\leq 0.1$  in controls. HHE rank represents rank of gene expression at E14.5 in the developing mouse heart. In HHE Rank, 'N/A' refers to mRNA expression in developing murine heart that does not have a human ortholog.

**Supplementary Table 10. Recessive damaging genotypes of two genes are significantly enriched in CHD cases when modeling compound heterozygous and homozygous separately**

| Gene            | Total Het RG | P-value Het RG       | Total Hom RG | P-value Hom RG        | Total RG | P-value total         |
|-----------------|--------------|----------------------|--------------|-----------------------|----------|-----------------------|
| <i>GDF1</i>     | 1            | $2.9 \times 10^{-3}$ | 10           | $1.2 \times 10^{-26}$ | 11       | $1.5 \times 10^{-28}$ |
| <i>MYH6</i>     | 5            | $4.6 \times 10^{-5}$ | 2            | $8.3 \times 10^{-3}$  | 7        | $1.2 \times 10^{-6}$  |
| <i>EPB41L4A</i> | 2            | $4.6 \times 10^{-4}$ | 1            | $3.8 \times 10^{-2}$  | 3        | $5.2 \times 10^{-5}$  |
| <i>HEPHL1</i>   | 3            | $3.4 \times 10^{-4}$ | 1            | $7.6 \times 10^{-2}$  | 4        | $6.9 \times 10^{-5}$  |
| <i>DAW1</i>     | 1            | $2.0 \times 10^{-3}$ | 1            | $9.8 \times 10^{-3}$  | 2        | $7.0 \times 10^{-5}$  |
| <i>CD36</i>     | 2            | $4.8 \times 10^{-6}$ | NA           | NA                    | 2        | $1.2 \times 10^{-4}$  |
| <i>PPEF2</i>    | NA           | NA                   | 2            | $8.2 \times 10^{-5}$  | 2        | $1.3 \times 10^{-4}$  |
| <i>H6PD</i>     | 2            | $1.3 \times 10^{-3}$ | 1            | $4.9 \times 10^{-2}$  | 3        | $1.6 \times 10^{-4}$  |
| <i>KEL</i>      | NA           | NA                   | 2            | $2.3 \times 10^{-4}$  | 2        | $4.8 \times 10^{-4}$  |
| <i>KRT72</i>    | NA           | NA                   | 2            | $2.7 \times 10^{-4}$  | 2        | $6.0 \times 10^{-4}$  |
| <i>CAPN14</i>   | 1            | $1.2 \times 10^{-2}$ | 1            | $2.3 \times 10^{-2}$  | 2        | $6.0 \times 10^{-4}$  |
| <i>MT1HL1</i>   | NA           | NA                   | 1            | $6.4 \times 10^{-4}$  | 1        | $6.5 \times 10^{-4}$  |
| <i>F11</i>      | NA           | NA                   | 2            | $3.3 \times 10^{-4}$  | 2        | $7.8 \times 10^{-4}$  |
| <i>ATIC</i>     | 1            | $1.4 \times 10^{-2}$ | 1            | $2.6 \times 10^{-2}$  | 2        | $8.1 \times 10^{-4}$  |
| <i>FUT2</i>     | 1            | $1.5 \times 10^{-2}$ | 1            | $2.6 \times 10^{-2}$  | 2        | $8.4 \times 10^{-4}$  |
| <i>MFG8</i>     | NA           | NA                   | 2            | $4.1 \times 10^{-4}$  | 2        | $1.0 \times 10^{-3}$  |
| <i>PROC</i>     | 1            | $1.8 \times 10^{-2}$ | 1            | $2.9 \times 10^{-2}$  | 2        | $1.1 \times 10^{-3}$  |
| <i>HEXA</i>     | 1            | $1.9 \times 10^{-2}$ | 1            | $3.0 \times 10^{-2}$  | 2        | $1.2 \times 10^{-3}$  |
| <i>PATE1</i>    | NA           | NA                   | 1            | $1.5 \times 10^{-3}$  | 1        | $1.5 \times 10^{-3}$  |
| <i>OR2AG2</i>   | NA           | NA                   | 1            | $1.8 \times 10^{-3}$  | 1        | $1.9 \times 10^{-3}$  |

Significant enrichment of damaging recessive genotypes were identified in *GDF1* and *MYH6*. The number of compound heterozygous recessive genotypes (Total Het RG), homozygous recessive genotypes (Total Hom RG), and total recessive genotypes (Total RG) are provided for each gene. P-values are calculated using the binomial test for compound heterozygous (P-value Het RG), homozygous (P-value Hom RG), or total recessive genotypes (P-value total; significant threshold is  $2.6 \times 10^{-6}$ ).



**Supplementary Table 11a. *GDF1*-p.Met364Thr variant violates the Hardy Weinberg equilibrium in 204 Ashkenazim cases**

| <i>GDF1</i> -p.Met364Thr Genotypes | T/T    | T/C   | C/C  | HWE p-value           |
|------------------------------------|--------|-------|------|-----------------------|
| Observed                           | 193    | 1     | 10   | 5.5×10 <sup>-38</sup> |
| Expected                           | 183.54 | 19.92 | 0.54 |                       |

A one-degree of freedom chi-square test with Yate's correction was used to test whether the *GDF1*-p.Met364Thr recessive mutation is deviated from Hardy Weinberg equilibrium.

**Supplementary Table 11b. *GDF1*-p.Met364Thr allele frequency in Ashkenazi cases and controls**

| Mutation                 | 204 Ashkenazi Cases |       |       |         | 302 Ashkenazi Autism Parental controls + 926 independent Ashkenazi adults without CHD |       |       |         | OR  | P-value              |
|--------------------------|---------------------|-------|-------|---------|---------------------------------------------------------------------------------------|-------|-------|---------|-----|----------------------|
|                          | # T/T               | # T/C | # C/C | MAF (%) | # T/T                                                                                 | # T/C | # C/C | MAF (%) |     |                      |
| <i>GDF1</i> -p.Met364Thr | 193                 | 1     | 10    | 5.15    | 1,216                                                                                 | 12    | 0     | 0.49    | Inf | 2.8×10 <sup>-9</sup> |

Ashkenazim was determined by the PCA analysis. T and C alleles are major and minor alleles of *GDF1*-p.Met364Thr respectively. Two-sided Fisher's exact tests which compare the frequencies of the *GDF1*-p.Met364Thr recessive genotype in Ashkenazim suggest a significant difference between 204 Ashkenazi cases and 1,228 Ashkenazi controls.

**Supplementary Table 12. Overrepresentation of HTX, D-TGA, CTD, and LVO with damaging recessive genotypes in known Human or Mouse CHD genes**

| Diagnosis        | # Probands | # RGs     | Observed # RGs in CHD Genes | Expected # RGs in CHD Genes | Enrichment  | P-value                    |
|------------------|------------|-----------|-----------------------------|-----------------------------|-------------|----------------------------|
| <b>HTX/D-TGA</b> | <b>523</b> | <b>90</b> | <b>21</b>                   | <b>4.79</b>                 | <b>4.38</b> | <b>8.5×10<sup>-9</sup></b> |
| LVO              | 797        | 98        | 10                          | 5.73                        | 1.75        | 0.06                       |
| CTD              | 872        | 183       | 14                          | 9.36                        | 1.50        | 0.09                       |
| Other            | 572        | 78        | 4                           | 4.05                        | 0.99        | 0.58                       |
| AVC              | 107        | 18        | 2                           | 0.85                        | 2.35        | 0.21                       |

Enrichment and p-values for known Human or Mouse CHD genes were calculated using the binomial test adjusted for fitted values from the polynomial model using damaging *de novo* probabilities. Bolded values are p-values which surpass multiple testing cutoff  $0.01 = 0.05/5$ . Abbreviations: D-transposition of the great arteries (D-TGA) and heterotaxy (HTX). Conotruncal defects (CTD). Left ventricular outflow (LVO). Atrioventricular canal defects (AVC). RG: Recessive genotypes; CHD genes include known Human/Mouse CHD genes.

**Supplementary Table 13a. Rare loss-of-function heterozygous variants in known CHD genes in 2,871 cases**

| Gene set (# genes)             | Observed           |                | Expected           | Enrichment | P-value |
|--------------------------------|--------------------|----------------|--------------------|------------|---------|
|                                | # heterozygous LoF | # unique genes | # heterozygous LoF |            |         |
| All genes (18,989)             | 12,332             | 7,285          | -                  | -          | -       |
| Known Dominant Human CHD (115) | 66                 | 37             | 61.95              | 1.07       | 0.32    |
| Known Human CHD (212)          | 198                | 99             | 211.52             | 0.94       | 0.83    |

**Supplementary Table 13b. Rare loss-of-function heterozygous variants in known CHD genes in 3,578 parental controls**

| Gene set (# genes)             | Observed           |                | Expected           | Enrichment | P-value |
|--------------------------------|--------------------|----------------|--------------------|------------|---------|
|                                | # heterozygous LoF | # unique genes | # heterozygous LoF |            |         |
| All genes (18,989)             | 13,270             | 7,532          | -                  | -          | -       |
| Known Dominant Human CHD (115) | 40                 | 31             | 62.36              | 0.65       | 1       |
| Known Human CHD (212)          | 179                | 90             | 225.19             | 0.79       | 1       |

The expected number of heterozygous loss-of-function (LoF) variants was determined based on the total number of heterozygous LoF variants multiplied by the sum of LoF *de novo* probabilities for the gene set, divided by the sum of LoF *de novo* probabilities for all genes. Enrichment and p-values were calculated using the one-tailed binomial probability adjusted for the LoF *de novo* probability. Values in bold are p-values exceeding Bonferroni multiple testing cutoff =  $0.05/(2 \times 2) = 1.3 \times 10^{-2}$

**Supplementary Table 14. Gene-based burden analysis for all loss-of-function heterozygous variants in 2,871 cases**

| Gene               | Observed # LOF heterozygotes | Expected # LOF heterozygotes | Enrichment  | P-value                                | pLI         | HHE Rank    |
|--------------------|------------------------------|------------------------------|-------------|----------------------------------------|-------------|-------------|
| <b><i>FLT4</i></b> | <b>8</b>                     | <b>0.515</b>                 | <b>15.5</b> | <b><math>7.6 \times 10^{-8}</math></b> | <b>1.00</b> | <b>74.4</b> |
| <i>CCDC154</i>     | 7                            | 0.650                        | 10.8        | $5.5 \times 10^{-6}$                   | 0.31        | 18.4        |
| <i>SMAD6</i>       | 8                            | 0.929                        | 8.6         | $6.0 \times 10^{-6}$                   | 0.00        | 78.3        |
| <i>SLCO1B3</i>     | 9                            | 1.247                        | 7.2         | $6.6 \times 10^{-6}$                   | 0.00        | 11.7        |
| <i>C21ORF2</i> &   | 5                            | 0.283                        | 17.7        | $1.2 \times 10^{-5}$                   | NA          | 46.7        |
| <i>NODAL</i> *     | 4                            | 0.135                        | 29.6        | $1.2 \times 10^{-5}$                   | 0.95        | 16.4        |
| <i>H1FOO</i>       | 4                            | 0.143                        | 27.9        | $1.6 \times 10^{-5}$                   | 0.40        | 10.3        |
| <i>RNF167</i>      | 5                            | 0.360                        | 13.9        | $3.7 \times 10^{-5}$                   | 0.13        | 77.7        |
| <i>DNAH14</i> &    | 22                           | 8.200                        | 2.7         | $4.7 \times 10^{-5}$                   | 0.00        | N/A         |
| <i>NOTCH1</i> *    | 6                            | 0.794                        | 7.6         | $1.8 \times 10^{-4}$                   | 1.00        | 87.9        |
| <i>SUMO4</i> &     | 3                            | 0.106                        | 28.3        | $1.8 \times 10^{-4}$                   | 0.22        | N/A         |
| <i>CCDC168</i> &   | 10                           | 2.418                        | 4.1         | $2.1 \times 10^{-4}$                   | NA          | N/A         |
| <i>SSC5D</i> &     | 7                            | 1.164                        | 6.0         | $2.1 \times 10^{-4}$                   | 0.35        | 39.8        |
| <i>CYBA</i>        | 4                            | 0.283                        | 14.1        | $2.1 \times 10^{-4}$                   | 0.00        | 80.2        |
| <i>TLCD2</i>       | 4                            | 0.293                        | 13.7        | $2.4 \times 10^{-4}$                   | NA          | 38.0        |
| <i>SYCE1L</i>      | 4                            | 0.295                        | 13.6        | $2.5 \times 10^{-4}$                   | 0.07        | 28.0        |
| <i>IGFLR1</i> &    | 5                            | 0.546                        | 9.2         | $2.6 \times 10^{-4}$                   | 0.00        | 74.5        |
| <i>OR51T1</i>      | 4                            | 0.301                        | 13.3        | $2.7 \times 10^{-4}$                   | 0.02        | 0.0         |
| <i>SRRD</i>        | 5                            | 0.557                        | 9.0         | $2.8 \times 10^{-4}$                   | 0.00        | 51.2        |
| <i>MUC1</i>        | 3                            | 0.126                        | 23.7        | $3.1 \times 10^{-4}$                   | 0.73        | 21.8        |
| <i>VWDE</i> &      | 9                            | 2.085                        | 4.3         | $3.1 \times 10^{-4}$                   | NA          | 0.0         |
| <i>C10ORF90</i>    | 6                            | 0.892                        | 6.7         | $3.2 \times 10^{-4}$                   | NA          | 28.5        |
| <i>TMEM232</i> &   | 6                            | 0.902                        | 6.7         | $3.4 \times 10^{-4}$                   | NA          | 13.3        |
| <i>UNC5D</i> &     | 4                            | 0.330                        | 12.1        | $3.8 \times 10^{-4}$                   | 0.85        | 24.7        |
| <i>SIAE</i>        | 6                            | 0.945                        | 6.4         | $4.4 \times 10^{-4}$                   | 0.00        | 48.2        |

One-tailed binomial test was performed to test the enrichment of loss-of-function (LoF) heterozygous variants by comparing observed to expected. The expected number of LoF heterozygous variants within each gene was calculated by multiplying the total number of LoF heterozygous variants by the ratio between the LoF *de novo* probability for a gene and the sum of LoF *de novo* probabilities for all genes. Enrichment was calculated as the number of observed LoF heterozygous variants divided by the expected number. (\*) Denotes known Human CHD genes and (&) denote genes with a p-value  $\leq 0.05$  in controls. The genome-wide significance cutoff is  $2.6 \times 10^{-6}$  (0.05/18,989).

**a**

| Gene               | Observed # LoF heterozygotes | Expected # LoF heterozygotes | Enrichment  | P-value                                 | pLI         | HHE Rank    |
|--------------------|------------------------------|------------------------------|-------------|-----------------------------------------|-------------|-------------|
| <b><i>FLT4</i></b> | <b>7</b>                     | <b>0.074</b>                 | <b>95.2</b> | <b><math>1.9 \times 10^{-12}</math></b> | <b>1.00</b> | <b>74.4</b> |
| <i>SMTN</i>        | 3                            | 0.071                        | 42.0        | $5.7 \times 10^{-5}$                    | 0.76        | 91.5        |
| <i>ZNF79</i>       | 3                            | 0.097                        | 30.9        | $1.4 \times 10^{-4}$                    | 0.02        | N/A         |
| <i>RHBG</i>        | 3                            | 0.107                        | 28.1        | $1.9 \times 10^{-4}$                    | 0.00        | 36.3        |
| <i>OR10AG1</i>     | 2                            | 0.032                        | 62.8        | $4.9 \times 10^{-4}$                    | 0.00        | 10.3        |
| <i>ZNHIT3</i>      | 2                            | 0.038                        | 52.8        | $7.0 \times 10^{-4}$                    | 0.00        | 51.9        |
| <i>TMEM33</i>      | 2                            | 0.040                        | 49.8        | $7.8 \times 10^{-4}$                    | 0.23        | 76.3        |
| <i>ZRANB2</i>      | 2                            | 0.041                        | 49.4        | $7.9 \times 10^{-4}$                    | 0.99        | 89.1        |
| <i>SSC5D</i>       | 3                            | 0.177                        | 17.0        | $8.0 \times 10^{-4}$                    | 0.35        | 39.8        |
| <i>OR51L1</i>      | 2                            | 0.041                        | 48.4        | $8.3 \times 10^{-4}$                    | 0.02        | N/A         |
| <i>TNPO2</i>       | 2                            | 0.044                        | 45.0        | $9.6 \times 10^{-4}$                    | 1.00        | 91.9        |
| <i>ANKLE1</i>      | 3                            | 0.192                        | 15.6        | $1.0 \times 10^{-3}$                    | 0.00        | 46.6        |
| <i>SLCO1B3</i>     | 3                            | 0.195                        | 15.4        | $1.1 \times 10^{-3}$                    | 0.00        | 11.7        |
| <i>UNC5D</i>       | 2                            | 0.047                        | 42.5        | $1.1 \times 10^{-3}$                    | 0.85        | 24.7        |
| <i>PROKR2</i>      | 2                            | 0.048                        | 41.8        | $1.1 \times 10^{-3}$                    | 0.00        | 25.9        |
| <i>IFNGR1</i>      | 2                            | 0.055                        | 36.7        | $1.4 \times 10^{-3}$                    | 0.33        | 57.3        |
| <i>CAPN11</i>      | 3                            | 0.218                        | 13.8        | $1.5 \times 10^{-3}$                    | 0.00        | 15.6        |
| <i>ATP2A2</i>      | 2                            | 0.056                        | 35.9        | $1.5 \times 10^{-3}$                    | 1.00        | 99.9        |
| <i>GSTK1</i>       | 2                            | 0.059                        | 33.9        | $1.7 \times 10^{-3}$                    | 0.00        | 47.5        |
| <i>PLEKHA6</i>     | 2                            | 0.061                        | 32.9        | $1.8 \times 10^{-3}$                    | 0.98        | 80.9        |

**b**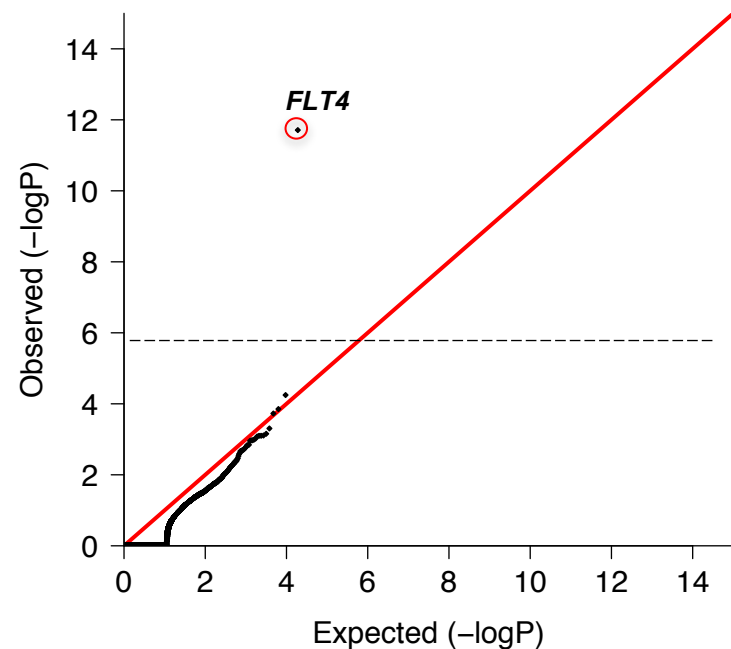

**Supplementary Table 15. Rare loss-of-function heterozygous mutations in *FLT4* are significantly enriched in Tetralogy of Fallot patients.** (a) Top 20 genes that have the most significant enrichment from the one-tailed binomial test was shown. The expected number of loss-of-function (LoF) heterozygous variants within each gene was calculated by multiplying the total number of LoF heterozygous variants by the ratio between LoF *de novo* probability for a gene and the sum of LoF *de novo* probability for all genes. Enrichment was calculated as the number of observed LoF heterozygous variants divided by the expected number. (b) The quantile-quantile plot of expected versus observed p-values for all LoF heterozygous variants in 426 Tetralogy of Fallot patients.

**Supplementary Table 16. *De novo* enrichment analysis in 2,645 cases versus 1,789 controls**

| Cases, N=2,645                |          |       |          |       |            |                       | Controls, N=1,789             |          |       |          |       |            |      |
|-------------------------------|----------|-------|----------|-------|------------|-----------------------|-------------------------------|----------|-------|----------|-------|------------|------|
|                               | Observed |       | Expected |       | Enrichment | P                     |                               | Observed |       | Expected |       | Enrichment | P    |
|                               | N        | Rate  | N        | Rate  |            |                       |                               | N        | Rate  |          |       |            |      |
| <b>All Genes</b>              |          |       |          |       |            |                       | <b>All Genes</b>              |          |       |          |       |            |      |
| Total                         | 2990     | 1.130 | 2956.2   | 1.118 | 1.0        | 0.27                  | Total                         | 1830     | 1.023 | 1949.9   | 1.09  | 0.9        | 1.0  |
| Syn                           | 701      | 0.265 | 839.2    | 0.317 | 0.8        | 1.00                  | Syn                           | 484      | 0.271 | 549.6    | 0.307 | 0.9        | 1.0  |
| T-Mis                         | 1462     | 0.553 | 1508.7   | 0.570 | 1.0        | 0.8                   | T-Mis                         | 974      | 0.544 | 993.3    | 0.555 | 1.0        | 0.7  |
| D-Mis                         | 453      | 0.171 | 348.2    | 0.132 | 1.3        | 4.4x10 <sup>-8</sup>  | D-Mis                         | 222      | 0.124 | 232.8    | 0.13  | 1.0        | 0.8  |
| LoF                           | 374      | 0.141 | 260.1    | 0.098 | 1.4        | 2.0x10 <sup>-11</sup> | LoF                           | 150      | 0.084 | 174.3    | 0.097 | 0.9        | 1.0  |
| Damaging                      | 827      | 0.313 | 608.3    | 0.23  | 1.4        | 2.4x10 <sup>-17</sup> | Damaging                      | 372      | 0.208 | 407.1    | 0.228 | 0.9        | 1.0  |
| <b>HHE Genes</b>              |          |       |          |       |            |                       | <b>HHE Genes</b>              |          |       |          |       |            |      |
| Total                         | 1043     | 0.394 | 835.8    | 0.316 | 1.3        | 2.8x10 <sup>-12</sup> | Total                         | 533      | 0.298 | 555.0    | 0.310 | 1.0        | 0.8  |
| Syn                           | 210      | 0.079 | 233.1    | 0.088 | 0.9        | 0.94                  | Syn                           | 135      | 0.075 | 153.8    | 0.086 | 0.9        | 0.9  |
| T-Mis                         | 443      | 0.167 | 417.8    | 0.158 | 1.1        | 0.11                  | T-Mis                         | 272      | 0.152 | 276.9    | 0.155 | 1.0        | 0.6  |
| D-Mis                         | 199      | 0.075 | 108.1    | 0.041 | 1.8        | 3.2x10 <sup>-15</sup> | D-Mis                         | 74       | 0.041 | 72.5     | 0.041 | 1.0        | 0.4  |
| LoF                           | 190      | 0.072 | 76.9     | 0.029 | 2.5        | 1.4x10 <sup>-27</sup> | LoF                           | 52       | 0.029 | 51.7     | 0.029 | 1.0        | 0.5  |
| Damaging                      | 389      | 0.147 | 184.9    | 0.070 | 2.1        | 3.9x10 <sup>-39</sup> | Damaging                      | 126      | 0.070 | 124.2    | 0.069 | 1.0        | 0.4  |
| <b>Intolerant Genes</b>       |          |       |          |       |            |                       | <b>Intolerant Genes</b>       |          |       |          |       |            |      |
| Total                         | 710      | 0.27  | 557.5    | 0.21  | 1.3        | 3.2x10 <sup>-10</sup> | Total                         | 359      | 0.20  | 370.3    | 0.21  | 1          | 0.73 |
| Syn                           | 139      | 0.05  | 152.9    | 0.06  | 0.9        | 0.88                  | Syn                           | 86       | 0.05  | 101.0    | 0.06  | 0.9        | 0.94 |
| T-Mis                         | 299      | 0.11  | 275.4    | 0.10  | 1.1        | 0.08                  | T-Mis                         | 195      | 0.11  | 182.5    | 0.10  | 1.1        | 0.19 |
| D-Mis                         | 140      | 0.05  | 75.5     | 0.03  | 1.9        | 2.1x10 <sup>-11</sup> | D-Mis                         | 49       | 0.03  | 50.8     | 0.03  | 1          | 0.62 |
| LoF                           | 132      | 0.05  | 53.7     | 0.02  | 2.5        | 1.6x10 <sup>-19</sup> | LoF                           | 29       | 0.02  | 36.1     | 0.02  | 0.8        | 0.90 |
| Damaging                      | 272      | 0.10  | 129.1    | 0.05  | 2.1        | 5.1x10 <sup>-28</sup> | Damaging                      | 78       | 0.04  | 86.8     | 0.05  | 0.9        | 0.84 |
| <b>Intolerant + HHE Genes</b> |          |       |          |       |            |                       | <b>Intolerant + HHE Genes</b> |          |       |          |       |            |      |
| Total                         | 449      | 0.17  | 325.2    | 0.12  | 1.4        | 4.9x10 <sup>-11</sup> | Total                         | 196      | 0.11  | 216.6    | 0.12  | 0.9        | 0.93 |
| Syn                           | 73       | 0.03  | 88.3     | 0.03  | 0.8        | 0.96                  | Syn                           | 51       | 0.03  | 58.5     | 0.03  | 0.9        | 0.85 |
| T-Mis                         | 174      | 0.07  | 161.7    | 0.06  | 1.1        | 0.18                  | T-Mis                         | 99       | 0.06  | 107.4    | 0.06  | 0.9        | 0.80 |
| D-Mis                         | 94       | 0.04  | 43.4     | 0.02  | 2.2        | 2.1x10 <sup>-11</sup> | D-Mis                         | 31       | 0.02  | 29.3     | 0.02  | 1.1        | 0.40 |
| LoF                           | 108      | 0.04  | 31.8     | 0.01  | 3.4        | 2.7x10 <sup>-26</sup> | LoF                           | 15       | 0.01  | 21.4     | 0.01  | 0.7        | 0.94 |
| Damaging                      | 202      | 0.08  | 75.2     | 0.03  | 2.7        | 1.1x10 <sup>-33</sup> | Damaging                      | 46       | 0.03  | 50.6     | 0.03  | 0.9        | 0.76 |
| <b>LHE Genes</b>              |          |       |          |       |            |                       | <b>LHE Genes</b>              |          |       |          |       |            |      |
| Total                         | 1811     | 0.685 | 1955.4   | 0.739 | 0.9        | 1.0                   | Total                         | 1214     | 0.679 | 1286.1   | 0.719 | 0.9        | 1.0  |
| Syn                           | 463      | 0.175 | 559.3    | 0.211 | 0.8        | 1.0                   | Syn                           | 326      | 0.182 | 365.0    | 0.204 | 0.9        | 1.0  |
| T-Mis                         | 935      | 0.353 | 997.8    | 0.377 | 0.9        | 1.0                   | T-Mis                         | 653      | 0.365 | 654.9    | 0.366 | 1.0        | 0.5  |
| D-Mis                         | 242      | 0.092 | 229.2    | 0.087 | 1.1        | 0.2                   | D-Mis                         | 145      | 0.081 | 153.0    | 0.086 | 0.9        | 0.8  |
| LoF                           | 170      | 0.064 | 169.1    | 0.064 | 1.0        | 0.5                   | LoF                           | 90       | 0.050 | 113.2    | 0.063 | 0.8        | 1.0  |
| Damaging                      | 412      | 0.156 | 398.3    | 0.151 | 1.0        | 0.3                   | Damaging                      | 235      | 0.131 | 266.2    | 0.149 | 0.9        | 1.0  |

N: the number of *de novo* mutations; Rate: the number of *de novo* mutations divided by the number of individuals in the cohort; Enrichment: ratio of observed to expected numbers of mutations; Intolerant genes: Genes with a pLI score  $\geq 0.99$ . HHE: High heart-expressed genes (genes in the top quartile of expression); LHE: Lower heart-expressed genes (genes in the bottom three quartiles of expression); D-Mis: Damaging missense mutations as predicted by MetaSVM; T-Mis: Tolerated missense mutations as predicted by MetaSVM; Damaging: D-Mis+LoF.

**Supplementary Table 17. 46 chromatin modification genes with at least one loss-of-function or deleterious missense *de novo* mutation (GO:0016569)**

| Gene          | # LoF | # D-Mis | HHE Rank | pLI  | p                     |
|---------------|-------|---------|----------|------|-----------------------|
| <i>CHD7*</i>  | 11    | 3       | 93.4     | 1.00 | 1.6x10 <sup>-20</sup> |
| <i>KMT2D*</i> | 12    | 4       | 96.8     | 1.00 | 2.1x10 <sup>-20</sup> |
| <i>NSD1</i>   | 3     | 2       | 94.8     | 1.00 | 1.0x10 <sup>-5</sup>  |
| <i>KDM5B</i>  | 3     | 0       | 86.0     | 0.00 | 2.9x10 <sup>-5</sup>  |
| <i>POGZ</i>   | 2     | 1       | 83.8     | 1    | 2.5x10 <sup>-5</sup>  |
| <i>CTNNB1</i> | 2     | 0       | 99.0     | 1.00 | 2.1x10 <sup>-4</sup>  |
| <i>CHD4</i>   | 0     | 3       | 99.1     | 1.00 | 2.3x10 <sup>-3</sup>  |
| <i>KDM5A</i>  | 0     | 2       | 86.5     | 1.00 | 4.8x10 <sup>-3</sup>  |
| <i>UBE2B</i>  | 0     | 1       | 94.6     | 0.32 | 8.9x10 <sup>-3</sup>  |
| <i>BAG6</i>   | 1     | 0       | 97.6     | 1.00 | 9.2x10 <sup>-3</sup>  |
| <i>BRMS1L</i> | 1     | 0       | 80.7     | 0.37 | 0.01                  |
| <i>TP53</i>   | 1     | 0       | 88.9     | 0.91 | 0.01                  |
| <i>RUVBL1</i> | 1     | 0       | 61.0     | 1.00 | 0.01                  |
| <i>WHSC1</i>  | 1     | 1       | 89.0     | 1.00 | 0.01                  |
| <i>PRKAA2</i> | 1     | 0       | 91.8     | 0.00 | 0.02                  |
| <i>TRIM37</i> | 0     | 1       | 71.0     | 0.17 | 0.02                  |
| <i>PRDM6</i>  | 1     | 0       | 40.8     | NA   | 0.02                  |
| <i>USP16</i>  | 1     | 0       | 76.4     | 0.01 | 0.02                  |
| <i>WAC</i>    | 1     | 0       | 87.3     | 1.00 | 0.02                  |
| <i>HDAC7</i>  | 1     | 0       | 86.2     | 1.00 | 0.02                  |
| <i>HIRA</i>   | 1     | 0       | 73.7     | 1.00 | 0.03                  |
| <i>KANSL1</i> | 1     | 0       | 84.8     | 1.00 | 0.03                  |
| <i>TLK2</i>   | 1     | 0       | 71.6     | 1.00 | 0.03                  |

| Gene           | # LoF | # D-Mis | HHE Rank | pLI  | p    |
|----------------|-------|---------|----------|------|------|
| <i>ASXL1</i>   | 1     | 0       | 85.5     | 0.00 | 0.03 |
| <i>CTR9</i>    | 1     | 0       | 81.9     | 1.00 | 0.03 |
| <i>RNF20</i>   | 1     | 0       | 83.4     | 0.00 | 0.04 |
| <i>KDM6B</i>   | 1     | 0       | 94.7     | 1.00 | 0.04 |
| <i>HR</i>      | 0     | 1       | 24.3     | 0.00 | 0.04 |
| <i>CUL4B</i>   | 0     | 1       | 68.7     | 1.00 | 0.04 |
| <i>KAT6B</i>   | 1     | 0       | 81.7     | 1.00 | 0.04 |
| <i>ARID1B</i>  | 1     | 0       | 83.2     | 1.00 | 0.05 |
| <i>KMT2A</i>   | 1     | 1       | 86.1     | 1.00 | 0.05 |
| <i>PRKD1</i>   | 0     | 1       | 51.5     | 0.00 | 0.05 |
| <i>KAT6A</i>   | 1     | 0       | 88.9     | 1.00 | 0.05 |
| <i>NOS1</i>    | 0     | 1       | 24.2     | 1.00 | 0.06 |
| <i>UHRF2</i>   | 0     | 1       | 79.0     | 1.00 | 0.06 |
| <i>SMAD4</i>   | 0     | 1       | 78.6     | 0.97 | 0.06 |
| <i>KMT2C</i>   | 1     | 1       | 80.0     | 1.00 | 0.06 |
| <i>EP300</i>   | 1     | 0       | 88.1     | 1.00 | 0.06 |
| <i>HLTF</i>    | 0     | 1       | 59.3     | 0.00 | 0.07 |
| <i>EP400</i>   | 1     | 0       | 84.9     | 1.00 | 0.08 |
| <i>ASH1L</i>   | 1     | 0       | 87.0     | 1.00 | 0.08 |
| <i>GATA3</i>   | 0     | 1       | 34.9     | 0.88 | 0.09 |
| <i>EHMT1</i>   | 0     | 1       | 84.8     | 1.00 | 0.09 |
| <i>SMARCA1</i> | 0     | 1       | 77.4     | 1.00 | 0.11 |
| <i>ATRX</i>    | 0     | 1       | 95.4     | 1.00 | 0.20 |

\*\*GO Term: Chromatin Modification (GO:0016569), including 546 genes. The Bonferroni corrected threshold for genome-wide significance =  $P < 8.8 \times 10^{-7}$ .

**Supplementary Table 18. De novo enrichment analysis in all chromatin, HHE chromatin, and LoF-intolerant chromatin genes in cases and controls (GO:0016569)**

|                                                   | Cases, N=2,645 |       |          |       |            |                       | Controls, N=1,789                                 |      |          |      |            |          |      |
|---------------------------------------------------|----------------|-------|----------|-------|------------|-----------------------|---------------------------------------------------|------|----------|------|------------|----------|------|
|                                                   | Observed       |       | Expected |       | Enrichment | <i>p</i>              | Observed                                          |      | Expected |      | Enrichment | <i>p</i> |      |
|                                                   | N              | Rate  | N        | Rate  |            |                       | N                                                 | Rate | N        | Rate |            |          |      |
| <b>All Chromatin genes (N = 546)</b>              |                |       |          |       |            |                       | <b>All Chromatin genes (N = 546)</b>              |      |          |      |            |          |      |
| Total                                             | 180            | 0.068 | 117.3    | 0.044 | 1.5        | 4.8x10 <sup>-8</sup>  | Total                                             | 65   | 0.036    | 78   | 0.044      | 0.8      | 0.94 |
| Syn                                               | 21             | 0.008 | 32.2     | 0.012 | 0.7        | 0.99                  | Syn                                               | 12   | 0.007    | 21.3 | 0.012      | 0.6      | 0.99 |
| T-mis                                             | 70             | 0.026 | 56.7     | 0.021 | 1.2        | 4.8x10 <sup>-2</sup>  | T-mis                                             | 35   | 0.020    | 37.7 | 0.021      | 0.9      | 0.69 |
| D-Mis                                             | 31             | 0.012 | 17.2     | 0.007 | 1.8        | 1.7x10 <sup>-3</sup>  | D-Mis                                             | 12   | 0.007    | 11.5 | 0.006      | 1.0      | 0.49 |
| LoF                                               | 58             | 0.022 | 11.2     | 0.004 | 5.2        | 5.0x10 <sup>-23</sup> | LoF                                               | 6    | 0.003    | 7.5  | 0.004      | 0.8      | 0.76 |
| Damaging                                          | 89             | 0.034 | 28.4     | 0.011 | 3.1        | 8.7x10 <sup>-20</sup> | Damaging                                          | 18   | 0.010    | 19.1 | 0.011      | 0.9      | 0.63 |
| <b>Intolerant Chromatin genes (N = 187)</b>       |                |       |          |       |            |                       | <b>Intolerant Chromatin genes (N = 187)</b>       |      |          |      |            |          |      |
| Total                                             | 129            | 0.049 | 65.6     | 0.025 | 2.0        | 3.1x10 <sup>-12</sup> | Total                                             | 40   | 0.022    | 43.7 | 0.024      | 0.9      | 0.73 |
| Syn                                               | 15             | 0.006 | 17.6     | 0.007 | 0.9        | 0.77                  | Syn                                               | 8    | 0.004    | 11.7 | 0.007      | 0.7      | 0.90 |
| T-mis                                             | 42             | 0.016 | 30.6     | 0.012 | 1.4        | 2.9x10 <sup>-2</sup>  | T-mis                                             | 25   | 0.014    | 20.4 | 0.011      | 1.2      | 0.18 |
| D-Mis                                             | 24             | 0.009 | 10.8     | 0.004 | 2.2        | 3.8x10 <sup>-4</sup>  | D-Mis                                             | 4    | 0.002    | 7.3  | 0.004      | 0.5      | 0.93 |
| LoF                                               | 48             | 0.018 | 6.5      | 0.002 | 7.4        | 1.7x10 <sup>-25</sup> | LoF                                               | 3    | 0.002    | 4.4  | 0.002      | 0.7      | 0.81 |
| Damaging                                          | 72             | 0.027 | 17.4     | 0.007 | 4.2        | 1.1x10 <sup>-22</sup> | Damaging                                          | 7    | 0.004    | 11.7 | 0.007      | 0.6      | 0.95 |
| <b>HHE Chromatin genes (N = 257)</b>              |                |       |          |       |            |                       | <b>HHE Chromatin genes (N = 257)</b>              |      |          |      |            |          |      |
| Total                                             | 141            | 0.053 | 69.8     | 0.026 | 2.0        | 4.7x10 <sup>-14</sup> | Total                                             | 51   | 0.029    | 46.4 | 0.026      | 1.1      | 0.27 |
| Syn                                               | 14             | 0.005 | 18.9     | 0.007 | 0.7        | 0.9                   | Syn                                               | 10   | 0.006    | 12.5 | 0.007      | 0.8      | 0.80 |
| T-mis                                             | 49             | 0.019 | 32.9     | 0.012 | 1.5        | 5.1x10 <sup>-3</sup>  | T-mis                                             | 28   | 0.016    | 21.9 | 0.012      | 1.3      | 0.12 |
| D-Mis                                             | 24             | 0.009 | 11.2     | 0.004 | 2.1        | 6.1x10 <sup>-4</sup>  | D-Mis                                             | 8    | 0.004    | 7.5  | 0.004      | 1.06     | 0.48 |
| LoF                                               | 54             | 0.020 | 6.7      | 0.003 | 8.0        | 3.2x10 <sup>-30</sup> | LoF                                               | 5    | 0.003    | 4.5  | 0.003      | 1.1      | 0.47 |
| Damaging                                          | 78             | 0.029 | 18       | 0.007 | 4.4        | 1.2x10 <sup>-25</sup> | Damaging                                          | 13   | 0.007    | 12   | 0.007      | 1.08     | 0.43 |
| <b>Intolerant + HHE Chromatin genes (N = 134)</b> |                |       |          |       |            |                       | <b>Intolerant + HHE Chromatin genes (N = 134)</b> |      |          |      |            |          |      |
| Total                                             | 111            | 0.042 | 51.5     | 0.019 | 2.2        | 4.6x10 <sup>-13</sup> | Total                                             | 36   | 0.020    | 34.3 | 0.019      | 1.1      | 0.41 |
| Syn                                               | 11             | 0.004 | 13.8     | 0.005 | 0.8        | 0.81                  | Syn                                               | 8    | 0.004    | 9.1  | 0.005      | 0.9      | 0.69 |
| T-Mis                                             | 33             | 0.012 | 23.7     | 0.009 | 1.4        | 4.1x10 <sup>-2</sup>  | T-Mis                                             | 22   | 0.012    | 15.7 | 0.009      | 1.4      | 0.08 |
| D-Mis                                             | 22             | 0.008 | 8.9      | 0.003 | 2.5        | 1.4x10 <sup>-4</sup>  | D-Mis                                             | 4    | 0.002    | 6    | 0.003      | 0.7      | 0.85 |
| LoF                                               | 45             | 0.017 | 5.1      | 0.002 | 8.8        | 3.9x10 <sup>-27</sup> | LoF                                               | 2    | 0.001    | 3.4  | 0.002      | 0.6      | 0.86 |
| Damaging                                          | 67             | 0.025 | 14       | 0.005 | 4.8        | 1.5x10 <sup>-24</sup> | Damaging                                          | 6    | 0.003    | 9.4  | 0.005      | 0.6      | 0.91 |



**Supplementary Table 19a. Genes with multiple *de novo* mutations in 2,645 cases (observed vs. expected)**

|          | Observed | Expected | Enrichment | P-value              |
|----------|----------|----------|------------|----------------------|
| Total    | 357      | 317.0    | 1.1        | 2.2x10 <sup>-3</sup> |
| Syn      | 24       | 23.0     | 1.0        | 0.45                 |
| Missense | 172      | 145.2    | 1.2        | 5.2x10 <sup>-3</sup> |
| Damaging | 66       | 41.3     | 1.6        | 3.1x10 <sup>-5</sup> |
| D-Mis    | 35       | 20.4     | 1.7        | 5.8x10 <sup>-4</sup> |
| LoF      | 19       | 7.0      | 2.7        | 4.0x10 <sup>-5</sup> |

Observed and expected numbers of genes with > 1 *de novo* mutation in each variant category. 1 million simulations were performed based on the per-base probability of mutations in each category to determine the likelihood and the expected number of genes with > 1 *de novo* mutation.

**Supplementary Table 19b. HHE genes with multiple *de novo* mutations in 2,645 cases (observed vs. expected)**

|          | Observed | Expected | Enrichment | P-value              |
|----------|----------|----------|------------|----------------------|
| Total    | 149      | 106.0    | 1.4        | 5.0x10 <sup>-6</sup> |
| Syn      | 11       | 8.2      | 1.3        | 0.19                 |
| Missense | 70       | 50.1     | 1.4        | 2.1x10 <sup>-3</sup> |
| Damaging | 45       | 16.0     | 2.8        | < 10 <sup>-6</sup>   |
| D-Mis    | 21       | 8.0      | 2.6        | 2.5x10 <sup>-5</sup> |
| LoF      | 17       | 2.8      | 6.1        | < 10 <sup>-6</sup>   |

Observed and expected numbers of HHE genes with > 1 *de novo* mutation in each variant category. 1 million simulations were performed based on the per-base probability of mutation in each category to determine the likelihood and the expected number of **HHE** genes with > 1 *de novo* mutation.

**Supplementary Table 19c. LoF-intolerant genes with multiple *de novo* mutations in 2,645 cases (observed vs. expected)**

|          | Observed | Expected | Enrichment | P-value              |
|----------|----------|----------|------------|----------------------|
| Total    | 133      | 86.8     | 1.5        | < 10 <sup>-6</sup>   |
| Syn      | 9        | 6.3      | 1.4        | 0.18                 |
| Missense | 63       | 41.0     | 1.5        | 3.6x10 <sup>-4</sup> |
| Damaging | 38       | 14.1     | 2.7        | < 10 <sup>-6</sup>   |
| D-Mis    | 20       | 7.2      | 2.8        | 2.3x10 <sup>-5</sup> |
| LoF      | 13       | 2.2      | 5.9        | < 10 <sup>-6</sup>   |

Observed and expected numbers of LoF-intolerant genes (pLI ≥ 0.99) with > 1 *de novo* mutation in each variant category. 1 million simulations were performed based on the per-base probability of mutation in each category to determine the likelihood and the expected number of intolerant genes with > 1 *de novo* mutation.

**Supplementary Table 19d. HHE + LoF-intolerant genes with multiple *de novo* mutations in 2,645 cases (observed vs. expected)**

|          | Observed | Expected | Enrichment | P-value              |
|----------|----------|----------|------------|----------------------|
| Total    | 88       | 52.4     | 1.7        | < 10 <sup>-6</sup>   |
| Syn      | 6        | 3.8      | 1.6        | 0.18                 |
| Missense | 39       | 25.0     | 1.6        | 3.3x10 <sup>-3</sup> |
| Damaging | 31       | 8.6      | 3.6        | < 10 <sup>-6</sup>   |
| D-Mis    | 15       | 4.3      | 3.5        | 1.7x10 <sup>-5</sup> |
| LoF      | 12       | 1.4      | 8.6        | < 10 <sup>-6</sup>   |

Observed and expected numbers of HHE + LoF-intolerant genes with > 1 *de novo* mutation in each variant category. 1 million simulations were performed based on the per-base probability of mutation in each category to determine the likelihood and the expected number of HHE + intolerant genes with > 1 *de novo* mutation.

**Supplementary Table 20. 66 genes with more than one damaging *de novo* mutation in cases**

| Gene            | # LoF | # D-Mis | P-value               | HHE Rank | pLI  | Gene            | # LoF | # D-Mis | P-value              | HHE Rank | pLI  |
|-----------------|-------|---------|-----------------------|----------|------|-----------------|-------|---------|----------------------|----------|------|
| <i>CHD7*</i>    | 11    | 3       | 1.6x10 <sup>-20</sup> | 93.4     | 1.00 | <i>KRT13</i>    | 0     | 2       | 1.2x10 <sup>-3</sup> | 15.5     | 0.00 |
| <i>KMT2D*</i>   | 12    | 4       | 2.1x10 <sup>-20</sup> | 96.8     | 1.00 | <i>TBX5</i>     | 1     | 1       | 1.2x10 <sup>-3</sup> | 95.7     | 0.99 |
| <i>PTPN11*</i>  | 0     | 9       | 4.6x10 <sup>-17</sup> | 94.2     | 1.00 | <i>U2SURP</i>   | 1     | 1       | 1.2x10 <sup>-3</sup> | 88.0     | 1.00 |
| <i>GATA6*</i>   | 3     | 1       | 2.4x10 <sup>-7</sup>  | 94.8     | NA   | <i>ZEB2</i>     | 1     | 1       | 1.4x10 <sup>-3</sup> | 81.6     | 1.00 |
| <i>RBFOX2*</i>  | 3     | 0       | 3.4x10 <sup>-7</sup>  | 97.8     | 0.99 | <i>NGFR</i>     | 0     | 2       | 1.5x10 <sup>-3</sup> | 36.2     | 0.24 |
| <i>NSD1</i>     | 3     | 2       | 1.0x10 <sup>-5</sup>  | 94.8     | 1.00 | <i>CDK13</i>    | 1     | 1       | 1.5x10 <sup>-3</sup> | 80.0     | 0.75 |
| <i>POGZ</i>     | 2     | 1       | 2.5x10 <sup>-5</sup>  | 83.8     | 1.00 | <i>DTNA</i>     | 1     | 1       | 1.5x10 <sup>-3</sup> | 47.3     | 0.92 |
| <i>SOS1</i>     | 0     | 3       | 2.6x10 <sup>-5</sup>  | 67.9     | 1.00 | <i>MINK1</i>    | 0     | 2       | 1.6x10 <sup>-3</sup> | 88.1     | 1.00 |
| <i>GPBAR1</i>   | 1     | 1       | 2.6x10 <sup>-5</sup>  | 19.9     | 0.00 | <i>PRRC2B</i>   | 2     | 0       | 2.0x10 <sup>-3</sup> | 98.2     | 1.00 |
| <i>RAF1</i>     | 0     | 3       | 2.6x10 <sup>-5</sup>  | 91.4     | 1.00 | <i>NR6A1</i>    | 0     | 2       | 2.2x10 <sup>-3</sup> | 36.8     | 0.99 |
| <i>NOTCH1</i>   | 2     | 3       | 2.7x10 <sup>-5</sup>  | 87.9     | 1.00 | <i>CHD4</i>     | 0     | 3       | 2.3x10 <sup>-3</sup> | 99.1     | 1.00 |
| <i>KDM5B</i>    | 3     | 0       | 2.9x10 <sup>-5</sup>  | 86.0     | 0.00 | <i>DSCAML1</i>  | 0     | 2       | 2.5x10 <sup>-3</sup> | 9.5      | 1.00 |
| <i>SMAD2</i>    | 1     | 2       | 5.5x10 <sup>-5</sup>  | 74.7     | 0.99 | <i>FRYL</i>     | 2     | 0       | 2.8x10 <sup>-3</sup> | 84.4     | 1.00 |
| <i>PTEN</i>     | 2     | 0       | 6.0x10 <sup>-5</sup>  | 77.9     | 0.98 | <i>PPL</i>      | 1     | 1       | 2.8x10 <sup>-3</sup> | 47.1     | 0.00 |
| <i>RPL5</i>     | 2     | 0       | 6.2x10 <sup>-5</sup>  | 97.9     | 0.99 | <i>ANK3</i>     | 2     | 0       | 3.1x10 <sup>-3</sup> | 95.0     | 1.00 |
| <i>CYP21A2</i>  | 1     | 1       | 7.4x10 <sup>-5</sup>  | 14.0     | 0.67 | <i>KIAA0196</i> | 0     | 2       | 3.9x10 <sup>-3</sup> | 79.7     | 0.00 |
| <i>MYRF</i>     | 0     | 2       | 9.7x10 <sup>-5</sup>  | 85.6     | 1.00 | <i>CAD</i>      | 0     | 3       | 4.3x10 <sup>-3</sup> | 85.9     | 1.00 |
| <i>ACTB</i>     | 1     | 2       | 1.2x10 <sup>-4</sup>  | 99.9     | 0.94 | <i>FBN1</i>     | 0     | 3       | 4.5x10 <sup>-3</sup> | 93.1     | 1.00 |
| <i>RIT1</i>     | 0     | 2       | 1.2x10 <sup>-4</sup>  | 61.4     | 0.67 | <i>KDM5A</i>    | 0     | 2       | 4.8x10 <sup>-3</sup> | 86.5     | 1.00 |
| <i>ELN</i>      | 2     | 0       | 1.3x10 <sup>-4</sup>  | 79.8     | 0.00 | <i>TSC1</i>     | 1     | 1       | 7.5x10 <sup>-3</sup> | 73.8     | 1.00 |
| <i>SAMD11</i>   | 2     | 0       | 1.8x10 <sup>-4</sup>  | NA       | NA   | <i>GANAB</i>    | 1     | 1       | 9.3x10 <sup>-3</sup> | 93.7     | 1.00 |
| <i>CTNNB1</i>   | 2     | 0       | 2.1x10 <sup>-4</sup>  | 99.0     | 1.00 | <i>CLUH</i>     | 0     | 2       | 0.01                 | 95.9     | 1.00 |
| <i>NAA15</i>    | 2     | 0       | 2.2x10 <sup>-4</sup>  | 96.7     | 1.00 | <i>JAG1</i>     | 1     | 1       | 0.01                 | 76.8     | 1.00 |
| <i>PYGL</i>     | 0     | 3       | 2.7x10 <sup>-4</sup>  | 82.6     | 0.00 | <i>CACNA1A</i>  | 1     | 2       | 0.01                 | 48.7     | 1.00 |
| <i>AKAP12</i>   | 2     | 0       | 3.8x10 <sup>-4</sup>  | 94.2     | 0.37 | <i>WHSC1</i>    | 1     | 1       | 0.01                 | 89.0     | 1.00 |
| <i>MYH6</i>     | 1     | 3       | 4.2x10 <sup>-4</sup>  | 100.0    | 0.00 | <i>MYO7B</i>    | 0     | 2       | 0.02                 | 20.7     | 0.00 |
| <i>LZTR1</i>    | 0     | 2       | 4.8x10 <sup>-4</sup>  | 84.1     | 0.00 | <i>SCN10A</i>   | 0     | 2       | 0.02                 | 43.9     | 0.00 |
| <i>FLT4</i>     | 2     | 0       | 5.2x10 <sup>-4</sup>  | 74.4     | 1.00 | <i>NALCN</i>    | 0     | 2       | 0.03                 | 21.1     | 0.00 |
| <i>RABGAP1L</i> | 1     | 1       | 5.5x10 <sup>-4</sup>  | 78.4     | 0.09 | <i>RYR3</i>     | 1     | 2       | 0.03                 | 76.7     | 1.00 |
| <i>BRAF</i>     | 0     | 2       | 6.1x10 <sup>-4</sup>  | 65.8     | 1.00 | <i>FBN3</i>     | 0     | 2       | 0.04                 | N/A      | N/A  |
| <i>DGUOK</i>    | 0     | 2       | 7.2x10 <sup>-4</sup>  | 55.2     | 0.37 | <i>KMT2A</i>    | 1     | 1       | 0.05                 | 86.1     | 1.00 |
| <i>ITSN2</i>    | 0     | 2       | 8.2x10 <sup>-4</sup>  | 77.3     | 0.02 | <i>KMT2C</i>    | 1     | 1       | 0.06                 | 80.0     | 1.00 |
| <i>AHNAK</i>    | 1     | 1       | 1.1x10 <sup>-3</sup>  | 95.7     | 0.34 | <i>LRP1</i>     | 0     | 2       | 0.16                 | 92.9     | 1.00 |

Loss-of-function (LoF: non-sense, frameshift, canonical splice disruptions, and start loss mutations), and MetaSVM deleterious missense mutations were included.

Analysis was performed by compared the observed versus expected number of *de novo* mutations using the denovolyzeR package. The Bonferroni correction for genome-wide significance is = 0.05/(18,989x3) = 8.8x10<sup>-7</sup>.

**Supplementary Table 21a. De novo enrichment analysis in known monoallelic human CHD genes in cases and controls**

| Cases, N=2,645                                               |          |       |          |       |            |                       | Controls, N=1,789                                            |          |       |          |       |            |          |
|--------------------------------------------------------------|----------|-------|----------|-------|------------|-----------------------|--------------------------------------------------------------|----------|-------|----------|-------|------------|----------|
|                                                              | Observed |       | Expected |       | Enrichment | <i>p</i>              |                                                              | Observed |       | Expected |       | Enrichment | <i>p</i> |
|                                                              | N        | Rate  | N        | Rate  |            |                       |                                                              | N        | Rate  | N        | Rate  |            |          |
| <b>All monoallelic human CHD genes (N = 104)</b>             |          |       |          |       |            |                       | <b>All monoallelic genes (N = 104)</b>                       |          |       |          |       |            |          |
| Total                                                        | 128      | 0.048 | 32.6     | 0.012 | 3.9        | 1.2x10 <sup>-36</sup> | Total                                                        | 19       | 0.011 | 21.1     | 0.012 | 0.9        | 0.70     |
| Syn                                                          | 7        | 0.003 | 9.5      | 0.004 | 0.7        | 0.84                  | Syn                                                          | 5        | 0.003 | 6.1      | 0.003 | 0.8        | 0.72     |
| T-Mis                                                        | 13       | 0.005 | 11.4     | 0.004 | 1.1        | 0.32                  | T-Mis                                                        | 7        | 0.004 | 7.4      | 0.004 | 0.9        | 0.61     |
| D-Mis                                                        | 60       | 0.023 | 8.9      | 0.003 | 6.8        | 1.3x10 <sup>-29</sup> | D-Mis                                                        | 6        | 0.003 | 5.8      | 0.003 | 1.0        | 0.53     |
| LoF                                                          | 48       | 0.018 | 2.7      | 0.001 | 17.7       | 3.8x10 <sup>-42</sup> | LoF                                                          | 1        | 0.001 | 1.8      | 0.001 | 0.6        | 0.84     |
| Damaging                                                     | 108      | 0.041 | 11.6     | 0.004 | 9.3        | 5.5x10 <sup>-65</sup> | Damaging                                                     | 7        | 0.004 | 7.6      | 0.004 | 0.9        | 0.64     |
| <b>Intolerant monoallelic human CHD genes (N = 54)</b>       |          |       |          |       |            |                       | <b>Intolerant monoallelic human CHD genes (N = 54)</b>       |          |       |          |       |            |          |
| Total                                                        | 103      | 0.039 | 24.5     | 0.009 | 4.2        | 3.1x10 <sup>-32</sup> | Total                                                        | 12       | 0.007 | 16.1     | 0.009 | 0.7        | 0.88     |
| Syn                                                          | 5        | 0.002 | 7        | 0.003 | 0.7        | 0.82                  | Syn                                                          | 3        | 0.002 | 4.6      | 0.003 | 0.7        | 0.83     |
| T-Mis                                                        | 12       | 0.005 | 9.1      | 0.003 | 1.3        | 0.21                  | T-Mis                                                        | 5        | 0.003 | 6.0      | 0.003 | 0.8        | 0.71     |
| D-Mis                                                        | 47       | 0.018 | 6.3      | 0.002 | 7.5        | 2.5x10 <sup>-25</sup> | D-Mis                                                        | 3        | 0.002 | 4.2      | 0.002 | 0.7        | 0.79     |
| LoF                                                          | 39       | 0.015 | 2.1      | 0.001 | 18.2       | 4.8x10 <sup>-35</sup> | LoF                                                          | 1        | 0.001 | 1.4      | 0.001 | 0.7        | 0.76     |
| Damaging                                                     | 86       | 0.033 | 8.4      | 0.003 | 10.2       | 3.5x10 <sup>-55</sup> | Damaging                                                     | 4        | 0.002 | 5.7      | 0.003 | 0.7        | 0.82     |
| <b>HHE monoallelic human CHD genes (N = 75)</b>              |          |       |          |       |            |                       | <b>HHE monoallelic human CHD genes (N = 75)</b>              |          |       |          |       |            |          |
| Total                                                        | 114      | 0.043 | 26.6     | 0.010 | 4.3        | 3.6x10 <sup>-36</sup> | Total                                                        | 16       | 0.009 | 17.3     | 0.010 | 0.9        | 0.66     |
| Syn                                                          | 6        | 0.002 | 7.7      | 0.003 | 0.8        | 0.78                  | Syn                                                          | 4        | 0.002 | 5        | 0.003 | 0.8        | 0.73     |
| T-Mis                                                        | 10       | 0.004 | 9.4      | 0.004 | 1.1        | 0.47                  | T-Mis                                                        | 7        | 0.004 | 6.0      | 0.003 | 1.2        | 0.39     |
| D-Mis                                                        | 51       | 0.019 | 7.3      | 0.003 | 7.0        | 6.8x10 <sup>-26</sup> | D-Mis                                                        | 4        | 0.002 | 4.9      | 0.003 | 0.8        | 0.72     |
| LoF                                                          | 47       | 0.018 | 2.2      | 0.001 | 21.3       | 6.4x10 <sup>-45</sup> | LoF                                                          | 1        | 0.001 | 1.5      | 0.001 | 0.7        | 0.77     |
| Damaging                                                     | 98       | 0.037 | 9.5      | 0.004 | 10.3       | 8.8x10 <sup>-63</sup> | Damaging                                                     | 5        | 0.003 | 6.3      | 0.004 | 0.8        | 0.76     |
| <b>Intolerant + HHE monoallelic human CHD genes (N = 44)</b> |          |       |          |       |            |                       | <b>Intolerant + HHE monoallelic human CHD genes (N = 44)</b> |          |       |          |       |            |          |
| Total                                                        | 94       | 0.036 | 21.4     | 0.008 | 4.4        | 7.1x10 <sup>-31</sup> | Total                                                        | 12       | 0.007 | 14.2     | 0.008 | 0.8        | 0.75     |
| Syn                                                          | 5        | 0.002 | 6.1      | 0.002 | 0.8        | 0.73                  | Syn                                                          | 3        | 0.002 | 4        | 0.002 | 0.8        | 0.76     |
| T-Mis                                                        | 10       | 0.004 | 8.0      | 0.003 | 1.3        | 0.28                  | T-Mis                                                        | 5        | 0.003 | 5.2      | 0.003 | 1.0        | 0.59     |
| D-Mis                                                        | 41       | 0.016 | 5.5      | 0.002 | 7.4        | 4.4x10 <sup>-22</sup> | D-Mis                                                        | 3        | 0.002 | 3.7      | 0.002 | 0.8        | 0.72     |
| LoF                                                          | 38       | 0.014 | 1.9      | 0.001 | 20.5       | 4.5x10 <sup>-36</sup> | LoF                                                          | 1        | 0.001 | 1.2      | 0.001 | 0.8        | 0.71     |
| Damaging                                                     | 79       | 0.030 | 7.4      | 0.003 | 10.7       | 3.5x10 <sup>-52</sup> | Damaging                                                     | 4        | 0.002 | 5        | 0.003 | 0.8        | 0.73     |

Intolerant genes: Genes with a pLI score  $\geq 0.99$ . HHE: High heart-expressed genes (genes in the top quartile of expression).

**Supplementary Table 21b. De novo enrichment analysis in known biallelic human CHD genes in cases and controls**

| Cases, N=2,645                                            |          |       |          |       |            |          | Controls, N=1,789                                         |          |       |          |       |            |          |
|-----------------------------------------------------------|----------|-------|----------|-------|------------|----------|-----------------------------------------------------------|----------|-------|----------|-------|------------|----------|
|                                                           | Observed |       | Expected |       | Enrichment | <i>p</i> |                                                           | Observed |       | Expected |       | Enrichment | <i>p</i> |
|                                                           | N        | Rate  | N        | Rate  |            |          |                                                           | N        | Rate  |          |       |            |          |
| <b>All biallelic human CHD genes (N = 85)</b>             |          |       |          |       |            |          | <b>All biallelic human CHD genes (N = 85)</b>             |          |       |          |       |            |          |
| Total                                                     | 22       | 0.008 | 23.1     | 0.009 | 1.0        | 0.62     | Total                                                     | 16       | 0.009 | 15.4     | 0.009 | 1.0        | 0.47     |
| Syn                                                       | 8        | 0.003 | 6.3      | 0.002 | 1.3        | 0.30     | Syn                                                       | 3        | 0.002 | 4.2      | 0.002 | 0.7        | 0.79     |
| T-Mis                                                     | 6        | 0.002 | 11.1     | 0.004 | 0.5        | 0.96     | T-Mis                                                     | 9        | 0.005 | 7.4      | 0.004 | 1.2        | 0.32     |
| D-Mis                                                     | 6        | 0.002 | 3.4      | 0.001 | 1.8        | 0.13     | D-Mis                                                     | 1        | 0.001 | 2.3      | 0.001 | 0.4        | 0.90     |
| LoF                                                       | 2        | 0.001 | 2.3      | 0.001 | 0.9        | 0.67     | LoF                                                       | 3        | 0.002 | 1.5      | 0.001 | 2.0        | 0.20     |
| Damaging                                                  | 8        | 0.003 | 5.7      | 0.002 | 1.4        | 0.22     | Damaging                                                  | 4        | 0.002 | 3.8      | 0.002 | 1.0        | 0.53     |
| <b>Intolerant biallelic human CHD genes (N = 2)</b>       |          |       |          |       |            |          | <b>Intolerant biallelic human CHD genes (N = 2)</b>       |          |       |          |       |            |          |
| Total                                                     | 1        | 0.000 | 1.9      | 0.001 | 0.5        | 0.85     | Total                                                     | 2        | 0.001 | 1.2      | 0.001 | 1.6        | 0.36     |
| Syn                                                       | 0        | 0.000 | -        | -     | -          | -        | Syn                                                       | 0        | 0.000 | -        | -     | -          | -        |
| T-Mis                                                     | 0        | 0.000 | -        | -     | -          | -        | T-Mis                                                     | 1        | 0.001 | 0.3      | 0.000 | 3.3        | 0.26     |
| D-Mis                                                     | 1        | 0.000 | 0.7      | 0.000 | 1.4        | 0.50     | D-Mis                                                     | 1        | 0.001 | 0.5      | 0.000 | 2.1        | 0.37     |
| LoF                                                       | 0        | 0.000 | -        | -     | -          | -        | LoF                                                       | 0        | 0.000 | -        | -     | -          | -        |
| Damaging                                                  | 1        | 0.000 | 0.9      | 0.000 | 1.2        | 0.58     | Damaging                                                  | 1        | 0.001 | 0.6      | 0.000 | 1.7        | 0.44     |
| <b>HHE biallelic human CHD genes (N = 11)</b>             |          |       |          |       |            |          | <b>HHE biallelic human CHD genes (N = 11)</b>             |          |       |          |       |            |          |
| Total                                                     | 3        | 0.001 | 4.1      | 0.002 | 0.7        | 0.77     | Total                                                     | 3        | 0.002 | 2.7      | 0.002 | 1.1        | 0.50     |
| Syn                                                       | 1        | 0.001 | 1.2      | 0.000 | 0.8        | 0.70     | Syn                                                       | 1        | 0.001 | 0.8      | 0.000 | 1.3        | 0.55     |
| T-Mis                                                     | 0        | 0     | -        | -     | -          | -        | T-Mis                                                     | 1        | 0.001 | 1.7      | 0.001 | 0.6        | 0.81     |
| D-Mis                                                     | 1        | 0.001 | 2.5      | 0.001 | 2.1        | 0.39     | D-Mis                                                     | 0        | 0.000 | -        | -     | -          | -        |
| LoF                                                       | 1        | 0.001 | 0.3      | 0.000 | 3.4        | 0.25     | LoF                                                       | 1        | 0.001 | 0.2      | 0.000 | 5.1        | 0.18     |
| Damaging                                                  | 2        | 0.001 | 0.8      | 0.000 | 2.6        | 0.18     | Damaging                                                  | 1        | 0.001 | 0.5      | 0.000 | 1.9        | 0.41     |
| <b>Intolerant + HHE biallelic human CHD genes (N = 1)</b> |          |       |          |       |            |          | <b>Intolerant + HHE biallelic human CHD genes (N = 1)</b> |          |       |          |       |            |          |
| Total                                                     | 0        | 0.000 | -        | -     | -          | -        | Total                                                     | 1        | 0.001 | 0.5      | 0.000 | 2.1        | 0.38     |
| Syn                                                       | 0        | 0.000 | -        | -     | -          | -        | Syn                                                       | 0        | 0.000 | -        | -     | -          | -        |
| T-Mis                                                     | 0        | 0.000 | -        | -     | -          | -        | T-Mis                                                     | 1        | 0.001 | 0.3      | 0.000 | 3.4        | 0.25     |
| D-Mis                                                     | 0        | 0.000 | -        | -     | -          | -        | D-Mis                                                     | 0        | 0.000 | -        | -     | -          | -        |
| LoF                                                       | 0        | 0.000 | -        | -     | -          | -        | LoF                                                       | 0        | 0.000 | -        | -     | -          | -        |
| Damaging                                                  | 0        | 0.000 | -        | -     | -          | -        | Damaging                                                  | 0        | 0.000 | -        | -     | -          | -        |

Intolerant genes: Genes with a pLI score  $\geq 0.99$ . HHE: High heart-expressed genes (genes in the top quartile of expression).

**Supplementary Table 22a *De novo* enrichment analysis in high heart expressed genes in cases stratified by extracardiac manifestations and neurodevelopmental deficit status**

|                           | Observed |       | Expected |       | Enrichment | P                     | Observed                 |      | Expected |       | Enrichment | P   |                       |
|---------------------------|----------|-------|----------|-------|------------|-----------------------|--------------------------|------|----------|-------|------------|-----|-----------------------|
|                           | N        | Rate  | N        | Rate  |            |                       | N                        | Rate | N        | Rate  |            |     |                       |
| <b>Isolated CHD (820)</b> |          |       |          |       |            |                       | <b>CHD+NDD±EA (561)</b>  |      |          |       |            |     |                       |
| Syn                       | 64       | 0.078 | 72.3     | 0.088 | 0.9        | 0.85                  | Syn                      | 36   | 0.064    | 49.4  | 0.088      | 0.7 | 0.98                  |
| T-Mis                     | 152      | 0.185 | 129.5    | 0.158 | 1.2        | 2.9x10 <sup>-2</sup>  | T-Mis                    | 80   | 0.143    | 88.6  | 0.158      | 0.9 | 0.83                  |
| D-Mis                     | 43       | 0.052 | 33.5     | 0.041 | 1.3        | 0.06                  | D-Mis                    | 58   | 0.103    | 22.9  | 0.041      | 2.5 | 6.0x10 <sup>-10</sup> |
| LoF                       | 40       | 0.049 | 23.8     | 0.029 | 1.7        | 1.5x10 <sup>-3</sup>  | LoF                      | 68   | 0.121    | 16.3  | 0.029      | 4.2 | 1.2x10 <sup>-21</sup> |
| Damaging                  | 83       | 0.101 | 57.3     | 0.07  | 1.5        | 8.5x10 <sup>-4</sup>  | Damaging                 | 126  | 0.225    | 39.2  | 0.070      | 3.2 | 3.5x10 <sup>-28</sup> |
| <b>CHD+EA only (318)</b>  |          |       |          |       |            |                       | <b>CHD+EA±NDD (935)</b>  |      |          |       |            |     |                       |
| Syn                       | 27       | 0.085 | 28       | 0.088 | 1          | 0.6                   | Syn                      | 65   | 0.070    | 82.4  | 0.088      | 0.8 | 0.98                  |
| T-Mis                     | 56       | 0.176 | 50.2     | 0.158 | 1.1        | 0.22                  | T-Mis                    | 259  | 0.277    | 185.9 | 0.199      | 1.4 | 2.4x10 <sup>-7</sup>  |
| D-Mis                     | 29       | 0.091 | 13       | 0.041 | 2.2        | 8.8x10 <sup>-5</sup>  | D-Mis                    | 94   | 0.101    | 38.2  | 0.041      | 2.5 | 2.0x10 <sup>-14</sup> |
| LoF                       | 13       | 0.041 | 9.2      | 0.029 | 1.4        | 0.14                  | LoF                      | 95   | 0.102    | 27.2  | 0.029      | 3.5 | 3.8x10 <sup>-24</sup> |
| Damaging                  | 42       | 0.132 | 22.2     | 0.07  | 1.9        | 1.2x10 <sup>-4</sup>  | Damaging                 | 189  | 0.202    | 65.4  | 0.070      | 2.9 | 1.6x10 <sup>-35</sup> |
| <b>CHD+NDD only (327)</b> |          |       |          |       |            |                       | <b>CHD+Either (1274)</b> |      |          |       |            |     |                       |
| Syn                       | 27       | 0.083 | 28.8     | 0.088 | 0.9        | 0.66                  | Syn                      | 92   | 0.072    | 112.3 | 0.088      | 0.8 | 0.98                  |
| T-Mis                     | 40       | 0.122 | 51.6     | 0.158 | 0.8        | 0.96                  | T-Mis                    | 206  | 0.162    | 201.3 | 0.158      | 1.0 | 0.38                  |
| D-Mis                     | 21       | 0.064 | 13.4     | 0.041 | 1.6        | 3.2x10 <sup>-2</sup>  | D-Mis                    | 116  | 0.091    | 51.9  | 0.041      | 2.2 | 1.7x10 <sup>-14</sup> |
| LoF                       | 26       | 0.08  | 9.5      | 0.029 | 2.7        | 7.6x10 <sup>-6</sup>  | LoF                      | 121  | 0.095    | 37    | 0.029      | 3.3 | 9.3x10 <sup>-28</sup> |
| Damaging                  | 47       | 0.144 | 22.9     | 0.07  | 2.1        | 6.5x10 <sup>-6</sup>  | Damaging                 | 237  | 0.186    | 89.1  | 0.07       | 2.7 | 1.4x10 <sup>-38</sup> |
| <b>CHD+Both (222)</b>     |          |       |          |       |            |                       |                          |      |          |       |            |     |                       |
| Syn                       | 9        | 0.041 | 19.6     | 0.088 | 0.5        | 1                     |                          |      |          |       |            |     |                       |
| T-Mis                     | 39       | 0.176 | 35       | 0.158 | 1.1        | 0.27                  |                          |      |          |       |            |     |                       |
| D-Mis                     | 36       | 0.162 | 9.1      | 0.041 | 4          | 1.2x10 <sup>-11</sup> |                          |      |          |       |            |     |                       |
| LoF                       | 42       | 0.189 | 6.5      | 0.029 | 6.5        | 1.4x10 <sup>-20</sup> |                          |      |          |       |            |     |                       |
| Damaging                  | 78       | 0.351 | 15.5     | 0.07  | 5          | 1.6x10 <sup>-29</sup> |                          |      |          |       |            |     |                       |

Enrichment (ratio of observed to expected) of damaging *de novo* mutations in high heart expressed (HHE) genes is shown for each phenotype. P-values are shown and calculated using the *denovolyzer* R package. CHD cases were characterized as isolated, associated with extracardiac congenital anomalies (EA), neurodevelopmental deficit (NDD) or NDD and/or EA.

**Supplementary Table 22b *De novo* enrichment analysis in LoF-intolerant genes in cases stratified by extracardiac manifestations and neurodevelopmental deficit status**

|                           | Observed |       | Expected |       | Enrichment | <i>P</i>              |                           | Observed |       | Expected |       | Enrichment | <i>P</i>              |
|---------------------------|----------|-------|----------|-------|------------|-----------------------|---------------------------|----------|-------|----------|-------|------------|-----------------------|
|                           | N        | Rate  | N        | Rate  |            |                       |                           | N        | Rate  |          |       |            |                       |
| <b>Isolated CHD (820)</b> |          |       |          |       |            |                       | <b>CHD+NDD±EA (561)</b>   |          |       |          |       |            |                       |
| Syn                       | 44       | 0.054 | 47.2     | 0.058 | 0.9        | 0.7                   | Syn                       | 21       | 0.037 | 32.3     | 0.058 | 0.7        | 0.99                  |
| T-Mis                     | 88       | 0.107 | 85.0     | 0.104 | 1.0        | 0.39                  | T-Mis                     | 68       | 0.121 | 58.1     | 0.104 | 1.2        | 0.11                  |
| D-Mis                     | 34       | 0.041 | 23.3     | 0.028 | 1.5        | 2.2x10 <sup>-2</sup>  | D-Mis                     | 43       | 0.077 | 16       | 0.029 | 2.7        | 1.6x10 <sup>-8</sup>  |
| LoF                       | 22       | 0.027 | 16.6     | 0.020 | 1.3        | 0.12                  | LoF                       | 51       | 0.091 | 11.3     | 0.020 | 4.5        | 5.8x10 <sup>-18</sup> |
| Damaging                  | 56       | 0.068 | 39.9     | 0.049 | 1.4        | 9.2x10 <sup>-3</sup>  | Damaging                  | 94       | 0.168 | 27.3     | 0.049 | 3.5        | 1.7x10 <sup>-23</sup> |
| <b>CHD+EA only (318)</b>  |          |       |          |       |            |                       | <b>CHD+EA±NDD (935)</b>   |          |       |          |       |            |                       |
| Syn                       | 19       | 0.060 | 18.3     | 0.058 | 1.0        | 0.47                  | Syn                       | 45       | 0.048 | 53.8     | 0.058 | 0.8        | 0.9                   |
| T-Mis                     | 41       | 0.129 | 33.0     | 0.104 | 1.2        | 0.01                  | T-Mis                     | 117      | 0.125 | 96.9     | 0.104 | 1.2        | 2.6x10 <sup>-2</sup>  |
| D-Mis                     | 21       | 0.066 | 9.0      | 0.028 | 2.3        | 4.7x10 <sup>-4</sup>  | D-Mis                     | 65       | 0.070 | 26.6     | 0.028 | 2.4        | 2.3x10 <sup>-10</sup> |
| LoF                       | 12       | 0.038 | 6.4      | 0.020 | 1.9        | 3.1x10 <sup>-2</sup>  | LoF                       | 76       | 0.081 | 18.9     | 0.020 | 4.0        | 4.2x10 <sup>-23</sup> |
| Damaging                  | 33       | 0.104 | 15.5     | 0.049 | 2.1        | 7.1x10 <sup>-5</sup>  | Damaging                  | 141      | 0.151 | 45.5     | 0.049 | 3.1        | 7.7x10 <sup>-30</sup> |
| <b>CHD+NDD only (327)</b> |          |       |          |       |            |                       | <b>CHD+Either (1,274)</b> |          |       |          |       |            |                       |
| Syn                       | 12       | 0.037 | 18.8     | 0.057 | 0.6        | 0.96                  | Syn                       | 57       | 0.045 | 73.3     | 0.058 | 0.8        | 0.98                  |
| T-Mis                     | 34       | 0.104 | 33.9     | 0.104 | 1.0        | 0.52                  | T-Mis                     | 152      | 0.119 | 132.0    | 0.104 | 1.2        | 4.7x10 <sup>-2</sup>  |
| D-Mis                     | 17       | 0.052 | 9.3      | 0.028 | 1.8        | 1.5x10 <sup>-2</sup>  | D-Mis                     | 82       | 0.064 | 36.2     | 0.028 | 2.3        | 4.8x10 <sup>-11</sup> |
| LoF                       | 18       | 0.055 | 6.6      | 0.020 | 2.7        | 1.8x10 <sup>-4</sup>  | LoF                       | 94       | 0.074 | 25.7     | 0.020 | 3.7        | 3.2x10 <sup>-25</sup> |
| Damaging                  | 35       | 0.107 | 15.9     | 0.049 | 2.2        | 2.4x10 <sup>-5</sup>  | Damaging                  | 176      | 0.138 | 62       | 0.049 | 2.8        | 2.5x10 <sup>-32</sup> |
| <b>CHD+Both (222)</b>     |          |       |          |       |            |                       |                           |          |       |          |       |            |                       |
| Syn                       | 9        | 0.041 | 12.8     | 0.058 | 0.7        | 0.89                  |                           |          |       |          |       |            |                       |
| T-Mis                     | 33       | 0.149 | 23.0     | 0.104 | 1.4        | 2.9x10 <sup>-2</sup>  |                           |          |       |          |       |            |                       |
| D-Mis                     | 26       | 0.117 | 6.3      | 0.028 | 4.1        | 3.8x10 <sup>-9</sup>  |                           |          |       |          |       |            |                       |
| LoF                       | 33       | 0.149 | 4.5      | 0.020 | 7.4        | 4.8x10 <sup>-18</sup> |                           |          |       |          |       |            |                       |
| Damaging                  | 59       | 0.266 | 10.8     | 0.049 | 5.5        | 1.7x10 <sup>-24</sup> |                           |          |       |          |       |            |                       |

Enrichment (ratio of observed to expected) of damaging *de novo* mutations in LoF-intolerant genes (pLI ≥ 0.99) is shown for each phenotype. P-values are shown and calculated using the *denovolyzer* R package. CHD cases were characterized as isolated, associated with extracardiac congenital anomalies (EA), neurodevelopmental deficit (NDD) or NDD and/or EA.

**Supplementary Table 22c *De novo* expectation analysis in LoF-intolerant and high heart expressed genes in cases stratified by extracardiac manifestations and neurodevelopmental deficit status**

|                           | Observed |       | Expected |       | Enrichment | P                     |                          | Observed |       | Expected |       | Enrichment | P                     |
|---------------------------|----------|-------|----------|-------|------------|-----------------------|--------------------------|----------|-------|----------|-------|------------|-----------------------|
|                           | N        | Rate  | N        | Rate  |            |                       |                          | N        | Rate  | N        | Rate  |            |                       |
| <b>Isolated CHD (820)</b> |          |       |          |       |            |                       | <b>CHD+NDD±EA (561)</b>  |          |       |          |       |            |                       |
| Syn                       | 26       | 0.032 | 27.4     | 0.033 | 0.9        | 0.63                  | Syn                      | 9        | 0.016 | 18.7     | 0.033 | 0.5        | 1                     |
| T-Mis                     | 56       | 0.068 | 50.1     | 0.061 | 1.1        | 0.22                  | T-Mis                    | 33       | 0.059 | 34.3     | 0.061 | 1.0        | 0.29                  |
| D-Mis                     | 20       | 0.024 | 13.5     | 0.016 | 1.5        | 5.7x10 <sup>-2</sup>  | D-Mis                    | 28       | 0.050 | 9.2      | 0.016 | 3.0        | 4.8x10 <sup>-7</sup>  |
| LoF                       | 13       | 0.016 | 9.8      | 0.012 | 1.3        | 0.19                  | LoF                      | 46       | 0.082 | 6.7      | 0.012 | 6.8        | 3.2x10 <sup>-23</sup> |
| Damaging                  | 33       | 0.040 | 23.3     | 0.028 | 1.4        | 3.4x10 <sup>-2</sup>  | Damaging                 | 74       | 0.132 | 15.9     | 0.028 | 4.6        | 4.6x10 <sup>-26</sup> |
| <b>CHD+EA only (318)</b>  |          |       |          |       |            |                       | <b>CHD+EA±NDD (935)</b>  |          |       |          |       |            |                       |
| Syn                       | 13       | 0.041 | 10.6     | 0.033 | 1.2        | 0.27                  | Syn                      | 24       | 0.026 | 31.2     | 0.033 | 0.8        | 0.92                  |
| T-Mis                     | 23       | 0.072 | 19.5     | 0.061 | 1.2        | 0.24                  | T-Mis                    | 70       | 0.075 | 57.1     | 0.061 | 1.2        | 5.4x10 <sup>-2</sup>  |
| D-Mis                     | 17       | 0.053 | 5.2      | 0.016 | 3.3        | 3.4x10 <sup>-5</sup>  | D-Mis                    | 47       | 0.050 | 15.4     | 0.016 | 3.1        | 6.9x10 <sup>-11</sup> |
| LoF                       | 9        | 0.028 | 3.8      | 0.012 | 2.4        | 1.6x10 <sup>-2</sup>  | LoF                      | 67       | 0.072 | 11.2     | 0.012 | 6.0        | 1.0x10 <sup>-29</sup> |
| Damaging                  | 26       | 0.082 | 9.0      | 0.028 | 2.9        | 3.2x10 <sup>-6</sup>  | Damaging                 | 114      | 0.122 | 26.6     | 0.028 | 4.3        | 3.7x10 <sup>-36</sup> |
| <b>CHD+NDD only (327)</b> |          |       |          |       |            |                       | <b>CHD+Either (1274)</b> |          |       |          |       |            |                       |
| Syn                       | 5        | 0.015 | 10.9     | 0.033 | 0.5        | 0.98                  | Syn                      | 29       | 0.023 | 42.5     | 0.033 | 0.7        | 0.99                  |
| T-Mis                     | 16       | 0.049 | 20.0     | 0.061 | 0.8        | 0.84                  | T-Mis                    | 87       | 0.068 | 77.9     | 0.061 | 1.1        | 0.16                  |
| D-Mis                     | 9        | 0.028 | 5.4      | 0.017 | 1.7        | 9.5x10 <sup>-2</sup>  | D-Mis                    | 56       | 0.044 | 20.9     | 0.016 | 2.7        | 1.6x10 <sup>-10</sup> |
| LoF                       | 15       | 0.046 | 3.9      | 0.012 | 3.8        | 1.6x10 <sup>-5</sup>  | LoF                      | 82       | 0.064 | 15.3     | 0.012 | 5.4        | 8.1x10 <sup>-33</sup> |
| Damaging                  | 24       | 0.073 | 9.3      | 0.028 | 2.6        | 4.0x10 <sup>-5</sup>  | Damaging                 | 138      | 0.108 | 36.2     | 0.028 | 3.8        | 5.0x10 <sup>-38</sup> |
| <b>CHD+Both (222)</b>     |          |       |          |       |            |                       |                          |          |       |          |       |            |                       |
| Syn                       | 4        | 0.018 | 7.4      | 0.033 | 0.5        | 0.94                  |                          |          |       |          |       |            |                       |
| T-Mis                     | 16       | 0.072 | 13.6     | 0.061 | 1.2        | 0.29                  |                          |          |       |          |       |            |                       |
| D-Mis                     | 19       | 0.086 | 3.6      | 0.016 | 5.2        | 1.2x10 <sup>-8</sup>  |                          |          |       |          |       |            |                       |
| LoF                       | 31       | 0.140 | 2.7      | 0.012 | 11.6       | 1.5x10 <sup>-22</sup> |                          |          |       |          |       |            |                       |
| Damaging                  | 50       | 0.225 | 6.3      | 0.028 | 7.9        | 6.9x10 <sup>-28</sup> |                          |          |       |          |       |            |                       |

Enrichment (ratio of observed to expected) of damaging *de novo* mutations in LoF-intolerant (pLI ≥ 0.99) and high heart expressed (HHE) genes is shown for each phenotype. P-values are shown and calculated using the *denovolyzer* R package. CHD cases were characterized as isolated, associated with extracardiac congenital anomalies (EA), neurodevelopmental deficit (NDD) or NDD and/or EA.

**Supplementary Table 22d. *De novo* enrichment analysis in all genes in cases stratified by extracardiac manifestations and neurodevelopmental deficit status**

|                           | Observed |       | Expected |       | Enrichment | <i>P</i>              |                          | Observed |       | Expected |       | Enrichment | <i>P</i>              |
|---------------------------|----------|-------|----------|-------|------------|-----------------------|--------------------------|----------|-------|----------|-------|------------|-----------------------|
|                           | N        | Rate  | N        | Rate  |            |                       |                          | N        | Rate  |          |       |            |                       |
| <b>Isolated CHD (820)</b> |          |       |          |       |            |                       | <b>CHD+NDD±EA (561)</b>  |          |       |          |       |            |                       |
| Syn                       | 219      | 0.267 | 260.2    | 0.317 | 0.8        | 1                     | Syn                      | 128      | 0.228 | 178      | 0.317 | 0.7        | 1                     |
| T-Mis                     | 481      | 0.587 | 467.8    | 0.570 | 1.0        | 0.28                  | T-Mis                    | 297      | 0.529 | 319.9    | 0.570 | 0.9        | 0.9                   |
| D-Mis                     | 118      | 0.144 | 107.9    | 0.132 | 1.1        | 0.18                  | D-Mis                    | 119      | 0.212 | 73.9     | 0.132 | 1.6        | 8.4x10 <sup>-7</sup>  |
| LoF                       | 98       | 0.120 | 80.6     | 0.098 | 1.2        | 3.3x10 <sup>-2</sup>  | LoF                      | 107      | 0.191 | 55.2     | 0.098 | 1.9        | 4.2x10 <sup>-10</sup> |
| Damaging                  | 216      | 0.263 | 188.6    | 0.230 | 1.2        | 2.7x10 <sup>-2</sup>  | Damaging                 | 226      | 0.403 | 129      | 0.230 | 1.8        | 7.7x10 <sup>-15</sup> |
| <b>CHD+EA only (318)</b>  |          |       |          |       |            |                       | <b>CHD+EA±NDD (935)</b>  |          |       |          |       |            |                       |
| Syn                       | 102      | 0.321 | 100.9    | 0.317 | 1.0        | 0.47                  | Syn                      | 242      | 0.259 | 296.6    | 0.317 | 0.8        | 1                     |
| T-Mis                     | 179      | 0.563 | 181.3    | 0.570 | 1.0        | 0.28                  | T-Mis                    | 520      | 0.556 | 533.3    | 0.570 | 1.0        | 0.72                  |
| D-Mis                     | 60       | 0.189 | 41.9     | 0.132 | 1.4        | 4.9x10 <sup>-3</sup>  | D-Mis                    | 189      | 0.202 | 123.1    | 0.132 | 1.5        | 2.2x10 <sup>-8</sup>  |
| LoF                       | 44       | 0.138 | 31.3     | 0.098 | 1.4        | 1.8x10 <sup>-2</sup>  | LoF                      | 166      | 0.178 | 92       | 0.098 | 1.8        | 2.6x10 <sup>-12</sup> |
| Damaging                  | 104      | 0.327 | 73.1     | 0.230 | 1.4        | 3.9x10 <sup>-4</sup>  | Damaging                 | 355      | 0.380 | 215      | 0.230 | 1.7        | 1.7x10 <sup>-18</sup> |
| <b>CHD+NDD only (327)</b> |          |       |          |       |            |                       | <b>CHD+Either (1274)</b> |          |       |          |       |            |                       |
| Syn                       | 88       | 0.269 | 103.7    | 0.317 | 0.8        | 0.95                  | Syn                      | 331      | 0.260 | 404.2    | 0.317 | 0.8        | 1                     |
| T-Mis                     | 161      | 0.492 | 186.6    | 0.571 | 0.9        | 0.97                  | T-Mis                    | 686      | 0.538 | 726.7    | 0.570 | 0.9        | 0.94                  |
| D-Mis                     | 56       | 0.171 | 43       | 0.131 | 1.3        | 3.3x10 <sup>-2</sup>  | D-Mis                    | 246      | 0.193 | 167.7    | 0.132 | 1.5        | 9.2x10 <sup>-9</sup>  |
| LoF                       | 50       | 0.153 | 32.2     | 0.098 | 1.6        | 2.1x10 <sup>-3</sup>  | LoF                      | 217      | 0.170 | 125.3    | 0.098 | 1.7        | 7.4x10 <sup>-14</sup> |
| Damaging                  | 106      | 0.324 | 75.2     | 0.230 | 1.4        | 4.7x10 <sup>-4</sup>  | Damaging                 | 463      | 0.363 | 293      | 0.230 | 1.6        | 3.4x10 <sup>-20</sup> |
| <b>CHD+Both (222)</b>     |          |       |          |       |            |                       |                          |          |       |          |       |            |                       |
| Syn                       | 39       | 0.176 | 70.4     | 0.317 | 0.6        | 1                     |                          |          |       |          |       |            |                       |
| T-Mis                     | 131      | 0.590 | 126.7    | 0.571 | 1.0        | 0.36                  |                          |          |       |          |       |            |                       |
| D-Mis                     | 62       | 0.279 | 29.2     | 0.132 | 2.1        | 9.0x10 <sup>-8</sup>  |                          |          |       |          |       |            |                       |
| LoF                       | 56       | 0.252 | 21.8     | 0.098 | 2.6        | 7.3x10 <sup>-10</sup> |                          |          |       |          |       |            |                       |
| Damaging                  | 118      | 0.532 | 51.1     | 0.230 | 2.3        | 8.9x10 <sup>-16</sup> |                          |          |       |          |       |            |                       |

Enrichment (ratio of observed to expected) of damaging *de novo* mutations in all genes is shown for each phenotype. P-values are shown and calculated using the *denovolyzer* R package. CHD cases were characterized as isolated, associated with extracardiac congenital anomalies (EA), neurodevelopmental deficit (NDD) or NDD and/or EA.



**Supplementary Table 23. Ten genes with > 1 damaging *de novo* mutation in patients with CHD + NDD + EA**

| Gene            | # LoF | # D-Mis | HHE Rank | pLI  | <i>P</i>              | Known CHD Genes? | Chromatin Modifiers? |
|-----------------|-------|---------|----------|------|-----------------------|------------------|----------------------|
| <i>KMT2D</i> *  | 6     | 1       | 96.8     | 1.00 | $1.6 \times 10^{-15}$ | Yes              | Yes                  |
| <i>SOS1</i> *   | 0     | 3       | 67.9     | 1.00 | $1.6 \times 10^{-8}$  | Yes              | No                   |
| <i>PTPN11</i> * | 0     | 3       | 94.2     | 1.00 | $2.6 \times 10^{-8}$  | Yes              | No                   |
| <i>CHD7</i> *   | 3     | 0       | 93.4     | 1.00 | $4.7 \times 10^{-8}$  | Yes              | Yes                  |
| <i>RIT1</i> *   | 0     | 2       | 61.4     | 0.67 | $8.4 \times 10^{-7}$  | Yes              | No                   |
| <i>RAF1</i>     | 0     | 2       | 91.4     | 1.00 | $1.1 \times 10^{-5}$  | Yes              | No                   |
| <i>CHD4</i>     | 0     | 2       | 99.1     | 1.00 | $2.3 \times 10^{-4}$  | Yes              | Yes                  |
| <i>NSD1</i>     | 1     | 1       | 94.8     | 1.00 | $2.6 \times 10^{-4}$  | Yes              | Yes                  |
| <i>CAD</i>      | 0     | 2       | 85.9     | 1.00 | $3.6 \times 10^{-4}$  | No               | No                   |
| <i>NOTCH1</i>   | 1     | 1       | 87.9     | 1.00 | $3.9 \times 10^{-4}$  | Yes              | No                   |

Loss-of-function and MetaSVM deleterious missense mutations in patients with CHD + NDD + EA are shown. Analysis was performed by compared observed versus expected number of *de novo* mutations in the CHD + NDD + EA patient set using the denovolyzeR package. The Bonferroni correction for genome-wide significance is  $= 0.05/(18,989 \times 3) = 8.8 \times 10^{-7}$ . (\*) denotes genes that surpass genome-wide significance.

Supplementary Table 24a. Enrichment of overlapping high heart expressed and high brain expressed genes with damaging *de novo* mutations between CHD and autism cohorts

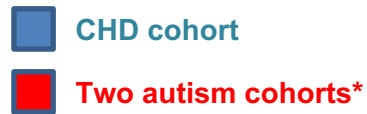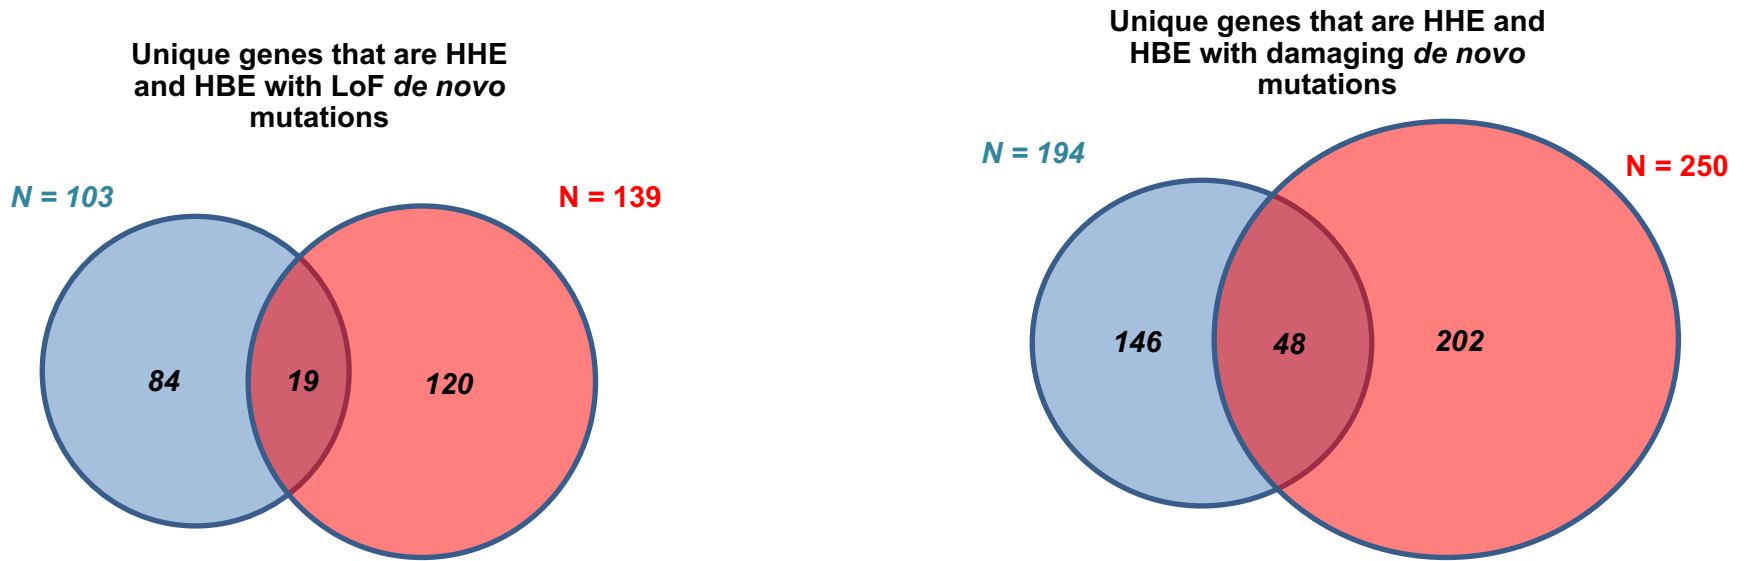

|                                                                                                   | Observed # genes | Expected # genes | Enrichment | Empirical P-value |
|---------------------------------------------------------------------------------------------------|------------------|------------------|------------|-------------------|
| HHE + HBE Genes with LoF <i>de novo</i> mutations overlapping between CHD and autism cohorts      | 19               | 3.68             | 5.16       | <10 <sup>-6</sup> |
| HHE + HBE Genes with damaging <i>de novo</i> mutations overlapping between CHD and autism cohorts | 48               | 17.35            | 2.77       | <10 <sup>-6</sup> |

10<sup>6</sup> permutations were performed to estimate the empirical distribution of the number of overlapping high heart expressed (HHE) + high brain expressed (HBE) genes between CHD and 2 autism cohorts. The empirical p-value is calculated as the proportion of the expected number of overlapping genes that exceeds the observed number of overlapping genes. For the detailed approach, please see **Online Methods**. \*These two autism cohorts refer to: (1) lossifov et al. *Nature* 2014 515, 216-221, and (2) De Rubeis et al. *Nature* 2014 515, 209-215.

Supplementary Table 24b. Enrichment of overlapping genes with LoF or damaging *de novo* mutations between CHD and autism cohorts

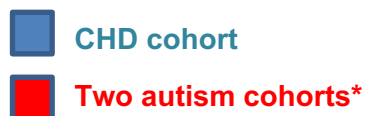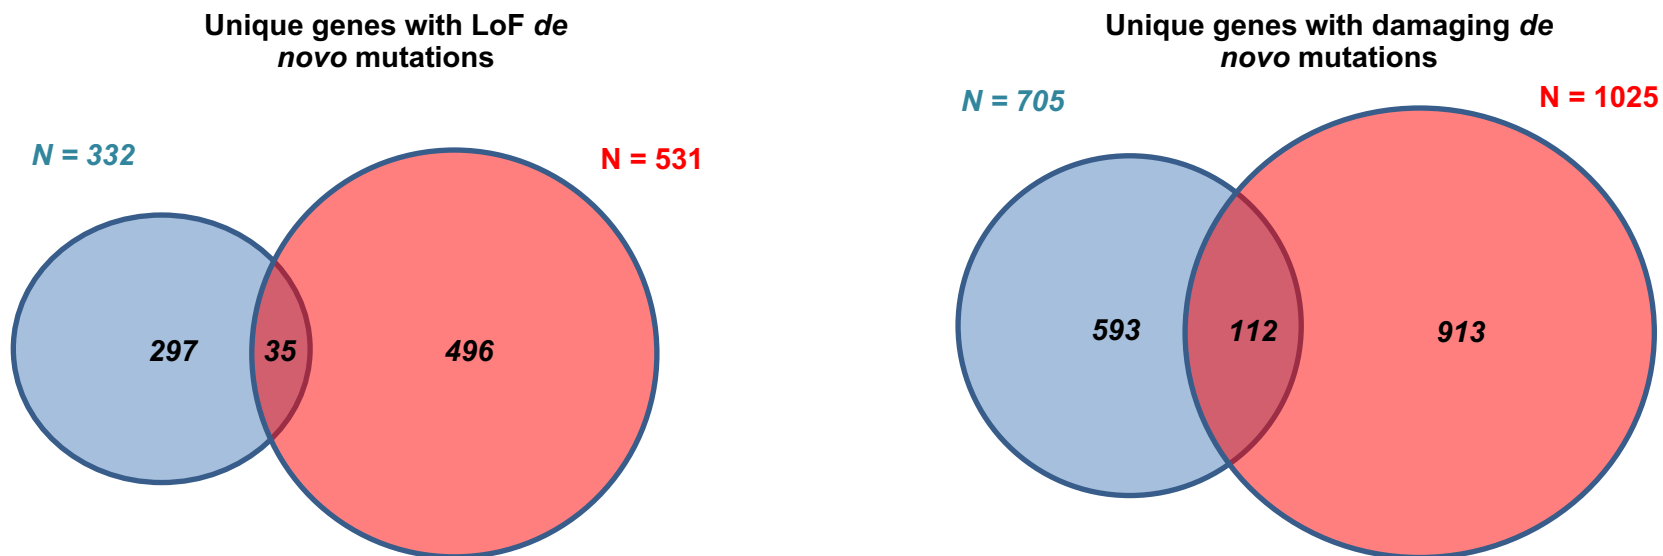

|                                                                                         | Observed # genes | Expected # genes | Enrichment | Empirical P-value    |
|-----------------------------------------------------------------------------------------|------------------|------------------|------------|----------------------|
| Genes with LoF <i>de novo</i> mutations overlapping between CHD and autism cohorts      | 35               | 16.83            | 2.08       | $2.9 \times 10^{-5}$ |
| Genes with damaging <i>de novo</i> mutations overlapping between CHD and autism cohorts | 112              | 81.23            | 1.38       | $2.0 \times 10^{-4}$ |

$10^6$  permutations were performed to estimate the empirical distribution of the number of overlapping genes between CHD and 2 autism cohorts. The empirical p-value is calculated as the proportion of the expected number of overlapping genes that exceeds the observed number of overlapping genes. For the detailed approach, please see **Online Methods**. \*These two autism cohorts refer to: (1) lossifov et al. *Nature* 2014 515, 216-221, and (2) De Rubeis et al. *Nature* 2014 515, 209-215.

**Supplementary Table 25. Thirty-five genes with loss-of-function *de novo* mutation shared between the CHD and autism cohorts\***

| Gene            | # LoF | HHE Rank | pLI  | Known CHD Gene? | Chromatin Modifier? | Extracardiac Status | NDD Status |
|-----------------|-------|----------|------|-----------------|---------------------|---------------------|------------|
| <i>KDM5B</i>    | 3     | 86.0     | 0.00 | No              | Yes                 | +/-                 | +/U/+      |
| <i>PTEN</i>     | 2     | 77.9     | 0.98 | Yes             | No                  | +/+                 | U/+        |
| <i>FRYL</i>     | 2     | 84.4     | 1.00 | No              | No                  | +/+                 | U/-        |
| <i>CTNNB1</i>   | 2     | 99.0     | 1.00 | No              | Yes                 | +/+                 | U/+        |
| <i>POGZ</i>     | 2     | 83.8     | 1.00 | No              | Yes                 | +/+                 | +/U        |
| <i>NOTCH1</i>   | 2     | 87.9     | 1.00 | Yes             | No                  | -/+                 | +/+        |
| <i>NAA15</i>    | 2     | 96.7     | 1.00 | No              | No                  | -/+                 | -/-        |
| <i>ZC3H14</i>   | 1     | 84.2     | 1.00 | No              | No                  | +                   | -          |
| <i>CCSER1</i>   | 1     | 26.5     | 0.21 | No              | No                  | -                   | -          |
| <i>NIN</i>      | 1     | 70.0     | 0.00 | No              | No                  | -                   | U          |
| <i>EP300</i>    | 1     | 88.1     | 1.00 | No              | Yes                 | +                   | +          |
| <i>ASH1L</i>    | 1     | 87.0     | 1.00 | No              | Yes                 | -                   | +          |
| <i>KDM6B</i>    | 1     | 94.7     | 1.00 | No              | Yes                 | +                   | +          |
| <i>KAT6A</i>    | 1     | 88.9     | 1.00 | No              | Yes                 | +                   | +          |
| <i>KMT2C</i>    | 1     | 80.0     | 1.00 | No              | Yes                 | -                   | +          |
| <i>KIAA0100</i> | 1     | 95.4     | 0.27 | No              | No                  | -                   | +          |
| <i>TLK2</i>     | 1     | 71.6     | 1.00 | No              | Yes                 | -                   | +          |
| <i>UBR3</i>     | 1     | 87.4     | 1.00 | No              | No                  | -                   | +          |
| <i>ZNF292</i>   | 1     | 77.3     | 1.00 | No              | No                  | -                   | U          |
| <i>SPRED2</i>   | 1     | 62.1     | 0.00 | No              | No                  | +                   | -          |
| <i>LRRFIP1</i>  | 1     | 96.4     | 0.37 | No              | No                  | -                   | -          |
| <i>SRRM2</i>    | 1     | 99.4     | NA   | No              | No                  | -                   | +          |
| <i>TANC2</i>    | 1     | 84.4     | 1.00 | No              | No                  | -                   | +          |
| <i>ARID1B</i>   | 1     | 83.2     | 1.00 | No              | Yes                 | +                   | U          |
| <i>EP400</i>    | 1     | 84.9     | 1.00 | No              | Yes                 | -                   | U          |
| <i>TECTA</i>    | 1     | 22.0     | 0.00 | No              | No                  | -                   | -          |
| <i>WAC</i>      | 1     | 87.3     | 1.00 | No              | Yes                 | +                   | U          |
| <i>ANK2</i>     | 1     | 72.8     | 1.00 | No              | No                  | +                   | U          |
| <i>KMT2A</i>    | 1     | 86.1     | 1.00 | Yes             | Yes                 | +                   | +          |
| <i>SETD5</i>    | 1     | 95.1     | 1.00 | No              | No                  | -                   | +          |
| <i>PSMD12</i>   | 1     | 89.1     | 1.00 | No              | No                  | -                   | +          |
| <i>SPTBN1</i>   | 1     | 99.4     | 1.00 | No              | No                  | +                   | U          |
| <i>CUL3</i>     | 1     | 83.0     | 0.97 | No              | No                  | -                   | -          |
| <i>BAI1</i>     | 1     | 20.0     | 1.00 | No              | No                  | -                   | -          |
| <i>WHSC1</i>    | 1     | 89.0     | 1.00 | No              | Yes                 | +                   | +          |

(+): positive; (-): negative; (U): Unknown. \*These two autism cohorts refer to: (1) lossifov et al. *Nature* 2014 515, 216-221, and (2) De Rubeis et al. *Nature* 2014 515, 209-215.

## SUPPLEMENTARY NOTE

**Duplicated samples.** To identify subjects which could have been recruited multiple times in case cohorts, control cohorts, or both, we calculated the overlap of high-confidence rare variants (MAF = 0% in ExAC, 1000 Genomes, and EVS) between each pair of individuals. For pairs that share  $\geq 80\%$  of rare variants, the sample with greater sequence coverage was kept in the analysis and the other discarded.

**Identification of copy number variations.** Samples were genotyped for CNVs as described previously<sup>1</sup>. Briefly, read depths for each sample at each exon were compiled using GATK DepthOfCoverage<sup>2,3</sup> and used for discovering copy number duplications or deletions using the XHMM (eXome-Hidden Markov Model) software<sup>4</sup>. *De novo* germline CNVs were called using XHMM best practices<sup>5</sup>. Any *de novo* CNVs involving a previously described CHD gene<sup>6</sup> or CHD-associated locus<sup>1</sup> resulted in sample exclusion from further analysis.

**Known human and mouse CHD gene sets:** We applied stringent criteria to define gene sets that contribute to CHD. We first manually curated a total of 212 genes that affect disease pathogenesis in humans. These genes were selected based on the following criteria: (1) identified in OMIM (On-Line Mendelian Inheritance in Man) as having an association with CHD; or, (2) being implicated in human CHD in previous publications<sup>7</sup>. Additionally, a set of 61 genes that has recently been shown to cause CHD in mice was downloaded from the supplementary materials<sup>8</sup>. Merging these two gene sets resulted in a total of 253 unique genes (**Supplementary Data Set 2**).

**Analysis of inbreeding and *GDF1* p.Met364Thr Shared Haplotype Analysis.** Haplotype phasing, inbreeding coefficient, and the longest homozygosity-by-descent (HBD) fragment were estimated using Beagle v3.3.2<sup>9</sup>. The criteria of consanguinity are defined as homozygosity in segments of 2cM or greater length that collectively comprise at least 0.35% of the genome.

The haplotype flanking *GDF1* p.Met364Thr variants was phased using the PhaseByTransmission tool of GATK<sup>2</sup> and the haplotype boundaries were determined for each family until the first heterozygotes were identified in both direction. This defined a shared haplotype spanning no more than 234 kb in length. Because all of *GDF1* p.Met364Thr carriers were AJs and shared a short haplotype, it suggests this is a founder mutation which originated several generations ago in the AJ. To estimate the exact age of the *GDF1* p.Met364Thr mutation, we used the DMLE+2.3<sup>10</sup> algorithm as previously described<sup>11</sup>. DMLE+2.3 performs a Bayesian inference that takes into account the proportion of disease chromosomes to estimate the mutation age based on observed linkage disequilibrium data from markers located within the shared haplotype. Genotypes for 62 polymorphic markers spanning the shared haplotype were entered. The proportion of sampled chromosomes (PSC) were estimated by  $PSC = n / (2 \times P \times MAF)$  where n represents the number of disease chromosomes for CHD patients harboring the *GDF1* p.Met364Thr mutation (n=21; 10 homozygotes and 1 heterozygote in 204 AJ cases), P represents the estimated size of

the AJ population (about  $1.1 \times 10^7$ ), and MAF represents the estimated minor allele frequency in the AJ population (0.56%). This resulted in a PSC of  $1.7 \times 10^{-4}$ . The population growth rates (PGR) of the AJ population were estimated by  $PGR = \ln(T_1/T_0)/g$ , where  $T_1$  represents the estimated size of the AJ population at the present time (about  $1.1 \times 10^7$ ),  $T_0$  represents the estimated size of the Eastern European population (about 7,000 in 1,170 A.D. and 10,000 in 1,500 A.D.), and  $g$  represents the number of generation between  $T_1$  and  $T_0$  assuming 20 years per generation. Using the  $T_0$  values from 1,170 A.D. and 1,500 A.D. resulted in PGR estimates of 0.175 and 0.26, respectively. The average of 0.175 and 0.26 (=0.22) was used for used for estimation. Final mutation age estimates were calculated using a PSC value of  $1.7 \times 10^{-4}$  and a PGR value of 0.22. The point estimate and 95% confidence interval were reported.

**Modeling of the distribution of recessive and dominant variant count per gene:** In an outbred population, the expected frequency of damaging RGs in each subject is the square of the cumulative frequency of damaging alleles in each gene,  $q^2$ ; similarly, the number of different RGs increases as the square of the number of different recessive alleles in a gene. From these expected values, one can use the binomial test to compare the observed count of damaging RGs found in a cohort to that expected by chance. We used the expected frequency of damaging DNMs in each gene as a proxy for the expected frequency of damaging rare heterozygous variants in each gene; these are highly correlated (Pearson correlation = 0.82 and 0.83 in cases and controls, respectively; **Supplementary Figure 2**), consistent with a previous study that suggested high correlation of using *de novo* probability for estimating counts of standing variations<sup>12</sup>.

The analysis of RGs is commonly complicated by the presence of inbreeding, in which the frequency of homozygous genotypes is increased. In this setting, the number of different homozygous genotypes does not increase as the square of the number of allelic loci in a gene, but instead increases linearly with this number. Similarly, the number of different compound heterozygous genotypes increases as  $q^2 - q$ . To account for this effect of inbreeding, we utilized two approaches: first, we jointly analyzed the burden of all RGs by fitting a polynomial regression model and performing a binomial test to determine the enrichment of RGs; as an alternative approach, we separately modeled homozygous and compound heterozygous genotypes and then calculated the enrichment using a binomial test of the combined results. Although the joint analysis is statistically more powerful and tests the most desired hypothesis (*i.e.*, that the burden of all damaging RGs in a gene or a gene set is greater than that expected by chance), these two approaches yielded similar empiric results.

More specifically, in the absence of inbreeding, for a gene  $x$  with  $n$  allelic loci which have equal allele frequency, the expected number of RGs (sum of homozygous and compound heterozygous genotypes) is a quadratic function of the number of allelic loci within this gene ( $n$ ), while the number of homozygous variants increases linearly with  $n$ . In an outbred population, the number of compound heterozygous variants, therefore, follows a polynomial function proportional to  $n^2 - n$ . However, in the

presence of inbreeding, the enrichment of homozygous variants distorts the expectation that the number of RGs increases with the square of the number of allelic loci; therefore, it is no longer accurate to calculate the expected number of RGs based on the quadratic function. To estimate the relationship between the number of observed RGs and mutability, we performed regression analysis and compared the following models:

- (1) Polynomial model: Number of RGs =  $\beta_0 + \beta_1 \times \text{mutability} + \beta_2 \times \text{mutability}^2 + \varepsilon$
- (2) Quadratic model: Number of RGs =  $\beta_0 + \beta_2 \times \text{mutability}^2 + \varepsilon$
- (3) Linear model: Number of RGs =  $\beta_0 + \beta_1 \times \text{mutability} + \varepsilon$

where  $\beta_0$  is the y-axis intercept (when the mutability is 0);  $\beta_1$  is the coefficient for the linear term (the difference in the predicted RG Count for each one-unit increment in mutability);  $\beta_2$  is the coefficient for the quadratic term (the difference in the predicted RG Count for each one-unit increment in mutability<sup>2</sup>).  $\varepsilon$  is a random variable accounting for the variance that cannot be explained by mutability.

To test this approach, we first fitted the polynomial regression model to the observed distribution of all rare compound heterozygous or homozygous synonymous genotypes in each gene in cases and controls (MAF  $\leq$  0.001 in ExAC, 1000 Genomes, and EVS). The goodness-of-fit was evaluated by the following fit metric (D')

$$D' = \left| 1 - \frac{\sum(\# \text{ observed RG} - \# \text{ expected RG})^2}{\sum(\# \text{ observed RG})^2} \right|$$

The data closely fit the polynomial model in cases and controls (goodness of fit metric  $D' = 0.98$  and  $0.99$ , respectively; **Supplementary Figure 3**). Q-Q plots showed that no gene showed more synonymous RGs than expected by chance (**Supplementary Figure 4**). We found that the polynomial model fits recessive, homozygous, and compound heterozygous counts substantially better than the quadratic and linear models (**Supplementary Figures 3-6**).

This method can be extended to analysis of the burden of RGs in specified gene sets. For example, by randomly selecting 10,000 gene sets of 100 - 1000 genes, the p-values for the burden of synonymous RGs in each gene set closely matched the expected values in cases and controls (**Supplementary Figure 5a**).

Alternatively, RG can also be modeled separately as compound heterozygotes or homozygotes without the need for regression fits. In this method, the expected number of compound heterozygotes for each gene is derived from distributing the observed number of RGs,  $N$ , across all genes according to the ratio of the squared *de novo* probabilities:

$$\text{Expected Compound RG}_i = N \times \frac{\text{probability}_{de\ novo}^2}{\sum_{Genes}(\text{probability}_{de\ novo}^2)}$$

The expected number of homozygotes is derived similarly, but using the linear ratio of *de novo* probabilities:

$$\text{Expected Homozygous RG}_i = N \times \frac{\text{probability}_{de\ novo}}{\sum_{Genes}(\text{probability}_{de\ novo})}$$

The expected distributions of homozygous, compound heterozygous, and total RG among cases and controls for synonymous (**Supplementary Figure 7**) and damaging (**Supplementary Figure 8**) variants fit the observed distributions remarkably well ( $D' \geq 0.95$ ). This method reaches similar conclusions to the polynomial fit method. In comparing the enrichments of damaging RG among cases by this method (**Supplementary Table 10**) to the polynomial method (**Supplementary Table 9**), two genes, *GDF1* and *MYH6*, are found to be significantly enriched. These analyses validate the use of the *de novo* probability coupled with the polynomial model to accurately estimate the expected number of RGs under the null model.

**Variant prioritization using VAAST and Phevor.** As an orthogonal approach to disease gene discovery, we also prioritized disease-causing dominant and recessive/compound heterozygous genotypes using the pedigree version of VAAST (Variant Annotation, Analysis, and Search Tool). VAAST is a probabilistic disease-gene finder that employs a burden test to identify disease-genes using personal genomes data<sup>13,14</sup>. VAAST uses the global amino acid substitution frequencies, nucleotide-level conservation and variant population frequency data to derive a score that reflects the degree of deleteriousness of each allele. The VAAST empirical p-value is derived by comparing the observed VAAST score to the scores obtained by permutation analysis of a background population (N=2,504) that encompasses 26 ethnicities, derived from the 1000 Genomes project. The minimal attainable permutation p value is equal to  $1/(\# \text{ of background genomes} + 1)$ , thus 0.000399. Any variant in any proband with a p-value  $\leq 0.005$  was retained for further analyses. This p-value was chosen so as to be maximally concordant with previous publications<sup>15</sup> and thus retain > 92% of reported positives.

Variants meeting the p-value threshold  $\leq 0.005$  were further analyzed using Phevor<sup>16</sup> (Phenotype Driven Variant Ontological Re-ranking Tool). Phevor re-ranks the outputs of variant prioritization tools using a novel algorithm that propagates information across and between ontologies (e.g., the Human Phenotype Ontology<sup>17</sup>) in order to accurately reprioritize potentially damaging alleles in light of the gene function, disease and phenotype knowledge. We have shown that Phevor is especially useful for single exome and family trio-based diagnostic analyses, the most commonly occurring clinical scenarios<sup>16</sup>. The following HPO terms were used to traverse HPO or HPO+gene ontology (GO) ontologies: Conotruncal Defects (CTD) – abnormality of the pulmonary artery (HP:0004414), double outlet right ventricle (HP:0001719), Tetralogy of Fallot (HP:0001636), transposition of the great arteries (HP:0001669), truncus arteriosus (HP:0001660); Left Ventricular Outflow Tract Obstruction (LVOTO) – abnormality of the left ventricular (HP:0011103), bicuspid aortic valve (HP:0001647), subvalvular aortic stenosis (HP:0001682), supravalvular aortic stenosis (HP:0004381), endocardial fibroelastosis (HP:0001706), coarctation of aorta (HP:0001680); and Heterotaxy (HTX) - ventricular septal defect (HP:0001629), defect in the atrial septum (HP:0001631), pulmonic stenosis (HP:0001642), patent ductus arteriosus (HP:0001643), dextrocardia (HP:0001651), transposition of the great arteries (HP:0001669), complete atrioventricular canal defect (HP:0001674), situs



inversus totalis (HP:0001696), asplenia (HP:0001746), polysplenia (HP:0001748), abnormality of the respiratory system (HP:0002086), Abnormal lung lobation (HP:0002101), abdominal situs inversus (HP:0003363), pulmonary artery atresia (HP:0004935), atrioventricular canal defect (HP:0006695), ectopia of the spleen (HP:0010452), anomalous pulmonary venous return (HP:0010772), right atrial isomerism (HP:0011536), left atrial isomerism (HP:0011537), common atrium (HP:0011565), mesocardia (HP:0011599), and right aortic arch (HP:0012020).

Only genes with final Phevor scores of  $> 2.3$  were retained. This threshold was selected as it corresponds to a neutral (flat) Bayesian prior (0.5). Thus any gene with a VAAST p-value  $\leq 0.005$  and a Phevor prior  $> 0.5$  would have a final score  $> 2.3$  ( $-\log_{10}$ ) for association with the proband's CHD phenotype based upon the contents of the Human Phenotype<sup>17</sup> and Gene Ontologies<sup>18</sup>; see Singleton et al.<sup>16</sup> for details. To reduce the rate of false positives, variants chosen by VAAST and Phevor were subjected to variant adjudication using a modified Smith-Waterman algorithm (Graphite, <http://marthlab.org>).

**Damaging recessive and *de novo* genotypes identified using VAAST/Phevor.** Manhattan plots for recessive genotypes in PCGC trio probands meeting criteria for VAAST p-value  $\leq 0.005$  and  $-\log_{10}$  Phevor scores  $> 2.3$  are displayed in **Supplementary Figure 9**. PCGC trio probands with damaging recessive genotypes in *GDF1*, *MYH6*, *DNAH5* and other selected genes concordant with the analysis pipeline described in the main text are presented. Manhattan plots for damaging *de novo* alleles identified using the VAAST-Phevor pipeline are presented in **Supplementary Figure 18**. As this pipeline compares the degree of burden using a distinct background population and a distinct permutation-based approach, these data provide an orthogonal approach that complements the findings described in the main text.

**Estimating the number of risk genes.** We followed the Monte Carlo simulation strategy described in Homsy et al.<sup>19</sup> to estimate the number of risk genes that are DNM targets<sup>19</sup>. We defined  $K$  to be the number of observed damaging DNMs in HHE genes among cases.  $R_1$  indicates the number of HHE genes mutated exactly twice in cases and  $R_2$  indicates the number of HHE genes mutated three times or more. Defined as  $E = (M_1 - M_2)/M_1$ , where  $M_1$  and  $M_2$  are the observed and expected count of damaging DNMs per trio, respectively. We then simulated the likelihood function as follows: First, we randomly selected  $G$  risk genes from the HHE gene set. Next, we simulated the number of contributing damaging mutations in risk genes, i.e.  $C$ , by sampling once from Binomial( $K, E$ ) distribution. Then, we simulated  $C$  contributing damaging mutations in  $G$  risk genes and  $K - C$  non-contributing damaging mutations in the complete HHE gene set using each gene's damaging mutability score as probability weights. We performed 20,000 simulations for  $G$  from 10 to 1,000, and calculated the likelihood function  $L(G)$  as the proportion of simulations in which the number of genes with two damaging mutations equals to  $R_1$  and the number of genes with three or more damaging mutations equals to  $R_2$ . We then estimated the number of risk genes using the maximum likelihood estimate (MLE). Based on the likelihood function, we calculated

the Fisher information and constructed the confidence interval based on the MLE and estimated Fisher information using the following equation

$$MLE \pm 1.96 \times \left( \frac{1}{\sqrt{\text{Fisher Information}}} \right)$$

## REFERENCES

1. Glessner, J.T. *et al.* Increased frequency of de novo copy number variants in congenital heart disease by integrative analysis of single nucleotide polymorphism array and exome sequence data. *Circ Res* **115**, 884-96 (2014).
2. McKenna, A. *et al.* The Genome Analysis Toolkit: a MapReduce framework for analyzing next-generation DNA sequencing data. *Genome Res* **20**, 1297-303 (2010).
3. Van der Auwera, G.A. *et al.* From FastQ data to high confidence variant calls: the Genome Analysis Toolkit best practices pipeline. *Curr Protoc Bioinformatics* **43**, 11 10 1-33 (2013).
4. Fromer, M. *et al.* Discovery and statistical genotyping of copy-number variation from whole-exome sequencing depth. *Am J Hum Genet* **91**, 597-607 (2012).
5. Fromer, M. & Purcell, S.M. Using XHMM Software to Detect Copy Number Variation in Whole-Exome Sequencing Data. *Curr Protoc Hum Genet* **81**, 7 23 1-7 23 21 (2014).
6. Fahed, A.C., Gelb, B.D., Seidman, J.G. & Seidman, C.E. Genetics of congenital heart disease: the glass half empty. *Circ Res* **112**, 707-20 (2013).
7. Sifrim, A. *et al.* Distinct genetic architectures for syndromic and nonsyndromic congenital heart defects identified by exome sequencing. *Nat Genet* **48**, 1060-5 (2016).
8. Li, Y. *et al.* Global genetic analysis in mice unveils central role for cilia in congenital heart disease. *Nature* **521**, 520-4 (2015).
9. Browning, S.R. & Browning, B.L. Rapid and accurate haplotype phasing and missing-data inference for whole-genome association studies by use of localized haplotype clustering. *Am J Hum Genet* **81**, 1084-97 (2007).
10. Reeve, J.P. & Rannala, B. DMLE+: Bayesian linkage disequilibrium gene mapping. *Bioinformatics* **18**, 894-5 (2002).
11. Lemaire, M. *et al.* Recessive mutations in DGKE cause atypical hemolytic-uremic syndrome. *Nat Genet* **45**, 531-6 (2013).
12. Samocha, K.E. *et al.* A framework for the interpretation of de novo mutation in human disease. *Nat Genet* **46**, 944-50 (2014).
13. Yandell, M. *et al.* A probabilistic disease-gene finder for personal genomes. *Genome Res* **21**, 1529-42 (2011).
14. Hu, H. *et al.* VAAST 2.0: improved variant classification and disease-gene identification using a conservation-controlled amino acid substitution matrix. *Genet Epidemiol* **37**, 622-34 (2013).
15. Zaidi, S. *et al.* De novo mutations in histone-modifying genes in congenital heart disease. *Nature* **498**, 220-3 (2013).
16. Singleton, M.V. *et al.* Phevor combines multiple biomedical ontologies for accurate identification of disease-causing alleles in single individuals and small nuclear families. *Am J Hum Genet* **94**, 599-610 (2014).
17. Groza, T. *et al.* The Human Phenotype Ontology: Semantic Unification of Common and Rare Disease. *Am J Hum Genet* **97**, 111-24 (2015).
18. Harris, M.A. *et al.* The Gene Ontology (GO) database and informatics resource. *Nucleic Acids Res* **32**, D258-61 (2004).
19. Homsy, J. *et al.* De novo mutations in congenital heart disease with neurodevelopmental and other congenital anomalies. *Science* **350**, 1262-6 (2015).
